# Supplementary material for: Network Pharmacology Approach for Predicting Targets of Zishen Yutai Pills on Premature Ovarian Insufficiency
Source: Hindawi journal article supplement (doi:10.1155/2021/8215454), 2021-08-04
Supplement: f1 [file 8215454.f1.zip]

| Supplementary Table S2E. Corresponding Targets of DS |           |                              |                                                     |             |                         |
|------------------------------------------------------|-----------|------------------------------|-----------------------------------------------------|-------------|-------------------------|
| Herb Name                                            | Mol ID    | Chemical Name                | Protein Name                                        | Symbol      | Sources                 |
| <i>Codonopsis Radix (Dang Shen, DS)</i>              | MOL000006 | Luteolin                     | mitogen-activated protein kinase 8                  | MAPK8       | STITCH                  |
| <i>Codonopsis Radix (Dang Shen, DS)</i>              | MOL000006 | Luteolin                     | matrix metalloproteinase 9 (gelatinase B, 92kDa)    | MMP9        | STITCH                  |
| <i>Codonopsis Radix (Dang Shen, DS)</i>              | MOL000006 | Luteolin                     | caspase 3, apoptosis-related cysteine peptidase     | CASP3       | STITCH                  |
| <i>Codonopsis Radix (Dang Shen, DS)</i>              | MOL000006 | Luteolin                     | jun proto-oncogene                                  | JUN         | STITCH                  |
| <i>Codonopsis Radix (Dang Shen, DS)</i>              | MOL000006 | Luteolin                     | FBI murine osteosarcoma viral oncogene homolog      | FOS         | STITCH                  |
| <i>Codonopsis Radix (Dang Shen, DS)</i>              | MOL000006 | Luteolin                     | cyclin-dependent kinase 2                           | CDK2        | STITCH                  |
| <i>Codonopsis Radix (Dang Shen, DS)</i>              | MOL000006 | Luteolin                     | epidermal growth factor receptor (1210 aa)          | EGFR        | STITCH                  |
| <i>Codonopsis Radix (Dang Shen, DS)</i>              | MOL000006 | Luteolin                     | SMAD family member 2                                | SMAD2       | STITCH                  |
| <i>Codonopsis Radix (Dang Shen, DS)</i>              | MOL000006 | Luteolin                     | cyclin A2                                           | CCNA2       | STITCH                  |
| <i>Codonopsis Radix (Dang Shen, DS)</i>              | MOL000006 | Luteolin                     | v-akt murine thymoma viral oncogene homolog         | AKT1        | STITCH                  |
| <i>Codonopsis Radix (Dang Shen, DS)</i>              | MOL000006 | Luteolin                     | 15-hydroxyprostaglandin dehydrogenase               | HPGD        | PubChem                 |
| <i>Codonopsis Radix (Dang Shen, DS)</i>              | MOL000006 | Luteolin                     | Cytochrome P450 Family 1 Subfamily A Member         | CYP1A2      | PubChem                 |
| <i>Codonopsis Radix (Dang Shen, DS)</i>              | MOL000006 | Luteolin                     | casein kinase 1 gamma 2                             | CSNK1G2     | PubChem                 |
| <i>Codonopsis Radix (Dang Shen, DS)</i>              | MOL000006 | Luteolin                     | CDC like kinase 3                                   | CLK3        | PubChem                 |
| <i>Codonopsis Radix (Dang Shen, DS)</i>              | MOL000006 | Luteolin                     | CDC Like Kinase 1                                   | CLK1        | PubChem                 |
| <i>Codonopsis Radix (Dang Shen, DS)</i>              | MOL000006 | Luteolin                     | serine/threonine kinase 16                          | STK16       | PubChem                 |
| <i>Codonopsis Radix (Dang Shen, DS)</i>              | MOL000006 | Luteolin                     | Pim-2 proto-oncogene, serine/threonine kinase       | PIK2        | PubChem                 |
| <i>Codonopsis Radix (Dang Shen, DS)</i>              | MOL000006 | Luteolin                     | carbonyl reductase 3                                | CBR3        | PubChem                 |
| <i>Codonopsis Radix (Dang Shen, DS)</i>              | MOL000006 | Luteolin                     | arachidonate 15-lipoxygenase type B                 | ALOX15B     | PubChem                 |
| <i>Codonopsis Radix (Dang Shen, DS)</i>              | MOL000006 | Luteolin                     | Cytochrome P450 3A4                                 | CYP3A4      | PubChem                 |
| <i>Codonopsis Radix (Dang Shen, DS)</i>              | MOL000006 | Luteolin                     | arachidonate 15-lipoxygenase                        | ALOX15      | PubChem                 |
| <i>Codonopsis Radix (Dang Shen, DS)</i>              | MOL000006 | Luteolin                     | MCL1 apoptosis regulator, BCL2 family member        | MCL1        | PubChem                 |
| <i>Codonopsis Radix (Dang Shen, DS)</i>              | MOL000006 | Luteolin                     | aldehyde dehydrogenase 1 family member A1           | ALDH1A1     | PubChem                 |
| <i>Codonopsis Radix (Dang Shen, DS)</i>              | MOL000006 | Luteolin                     | survival of motor neuron 2, centromeric             | SMN2        | PubChem                 |
| <i>Codonopsis Radix (Dang Shen, DS)</i>              | MOL000006 | Luteolin                     | Microtubule Associated Protein Tau                  | MAPT        | PubChem                 |
| <i>Codonopsis Radix (Dang Shen, DS)</i>              | MOL000006 | Luteolin                     | Cytochrome P450 2D6                                 | CYP2D6      | PubChem                 |
| <i>Codonopsis Radix (Dang Shen, DS)</i>              | MOL000006 | Luteolin                     | Cytochrome P450 2C19                                | CYP2C19     | PubChem                 |
| <i>Codonopsis Radix (Dang Shen, DS)</i>              | MOL000006 | Luteolin                     | Cytochrome P450 family 2 subfamily C member         | CYP2C9      | PubChem                 |
| <i>Codonopsis Radix (Dang Shen, DS)</i>              | MOL000006 | Luteolin                     | glutathione S-transferase omega 1                   | GSTO1       | PubChem                 |
| <i>Codonopsis Radix (Dang Shen, DS)</i>              | MOL000006 | Luteolin                     | glucosidase alpha, acid                             | GAA         | PubChem                 |
| <i>Codonopsis Radix (Dang Shen, DS)</i>              | MOL000006 | Luteolin                     | BLM RecQ like helicase                              | BLM         | PubChem                 |
| <i>Codonopsis Radix (Dang Shen, DS)</i>              | MOL000006 | Luteolin                     | alkaline phosphatase, intestinal                    | ALPI        | PubChem                 |
| <i>Codonopsis Radix (Dang Shen, DS)</i>              | MOL000006 | Luteolin                     | tyrosinase                                          | TYR         | PubChem                 |
| <i>Codonopsis Radix (Dang Shen, DS)</i>              | MOL000006 | Luteolin                     | glycogen synthase kinase 3 alpha                    | GSK3A       | PubChem                 |
| <i>Codonopsis Radix (Dang Shen, DS)</i>              | MOL000006 | Luteolin                     | glycogen synthase kinase 3 beta                     | GSK3B       | PubChem                 |
| <i>Codonopsis Radix (Dang Shen, DS)</i>              | MOL000006 | Luteolin                     | cyclin B2                                           | CCNB2       | PubChem                 |
| <i>Codonopsis Radix (Dang Shen, DS)</i>              | MOL000006 | Luteolin                     | Cyclin-dependent kinase 1                           | CDK1        | PubChem                 |
| <i>Codonopsis Radix (Dang Shen, DS)</i>              | MOL000006 | Luteolin                     | cyclin B1                                           | CCNB1       | PubChem                 |
| <i>Codonopsis Radix (Dang Shen, DS)</i>              | MOL000006 | Luteolin                     | cyclin B3                                           | CCNB3       | PubChem                 |
| <i>Codonopsis Radix (Dang Shen, DS)</i>              | MOL000006 | Luteolin                     | cyclin dependent kinase 5                           | CDK5        | PubChem                 |
| <i>Codonopsis Radix (Dang Shen, DS)</i>              | MOL000006 | Luteolin                     | cyclin dependent kinase 5 regulatory subunit 1      | CDK5R1      | PubChem                 |
| <i>Codonopsis Radix (Dang Shen, DS)</i>              | MOL000006 | Luteolin                     | glyoxalase I                                        | GLO1        | PubChem                 |
| <i>Codonopsis Radix (Dang Shen, DS)</i>              | MOL000006 | Luteolin                     | xanthine dehydrogenase                              | XDH         | PubChem                 |
| <i>Codonopsis Radix (Dang Shen, DS)</i>              | MOL000006 | Luteolin                     | nuclear receptor subfamily 3 group C member 1       | NR3C1       | PubChem                 |
| <i>Codonopsis Radix (Dang Shen, DS)</i>              | MOL000006 | Luteolin                     | androgen receptor                                   | AR          | PubChem                 |
| <i>Codonopsis Radix (Dang Shen, DS)</i>              | MOL000006 | Luteolin                     | monoamine oxidase A                                 | MAOA        | PubChem                 |
| <i>Codonopsis Radix (Dang Shen, DS)</i>              | MOL000006 | Luteolin                     | DNA polymerase beta                                 | POLB        | PubChem                 |
| <i>Codonopsis Radix (Dang Shen, DS)</i>              | MOL000006 | Luteolin                     | platelet activating factor acetylhydrolase 1b cati  | PAFAH1B2    | PubChem                 |
| <i>Codonopsis Radix (Dang Shen, DS)</i>              | MOL000006 | Luteolin                     | platelet activating factor acetylhydrolase 1b cati  | PAFAH1B3    | PubChem                 |
| <i>Codonopsis Radix (Dang Shen, DS)</i>              | MOL000006 | Luteolin                     | cytochrome P450 family 1 subfamily A member         | CYP1A1      | PubChem                 |
| <i>Codonopsis Radix (Dang Shen, DS)</i>              | MOL000006 | Luteolin                     | Cytochrome P450 1B1                                 | CYP1B1      | PubChem                 |
| <i>Codonopsis Radix (Dang Shen, DS)</i>              | MOL000006 | Luteolin                     | bromodomain adjacent to zinc finger domain 2B       | BAZ2B       | PubChem                 |
| <i>Codonopsis Radix (Dang Shen, DS)</i>              | MOL000006 | Luteolin                     | NADPH oxidase 4                                     | NOX4        | PubChem                 |
| <i>Codonopsis Radix (Dang Shen, DS)</i>              | MOL000006 | Luteolin                     | frataxin                                            | FXN         | PubChem                 |
| <i>Codonopsis Radix (Dang Shen, DS)</i>              | MOL000006 | Luteolin                     | TNF receptor superfamily member 10b                 | TNFRSF10B   | PubChem                 |
| <i>Codonopsis Radix (Dang Shen, DS)</i>              | MOL000006 | Luteolin                     | ATP-binding cassette super-family G member 2        | ABCG2       | PubChem                 |
| <i>Codonopsis Radix (Dang Shen, DS)</i>              | MOL000006 | Luteolin                     | DNA polymerase kappa                                | POLK        | PubChem                 |
| <i>Codonopsis Radix (Dang Shen, DS)</i>              | MOL000006 | Luteolin                     | DNA Polymerase iota                                 | POLI        | PubChem                 |
| <i>Codonopsis Radix (Dang Shen, DS)</i>              | MOL000006 | Luteolin                     | DNA Polymerase Eta                                  | POLH        | PubChem                 |
| <i>Codonopsis Radix (Dang Shen, DS)</i>              | MOL000006 | Luteolin                     | flap structure-specific endonuclease 1              | FEN1        | PubChem                 |
| <i>Codonopsis Radix (Dang Shen, DS)</i>              | MOL000006 | Luteolin                     | CD38 molecule                                       | CD38        | PubChem                 |
| <i>Codonopsis Radix (Dang Shen, DS)</i>              | MOL000006 | Luteolin                     | WRN RecQ like helicase                              | WRN         | PubChem                 |
| <i>Codonopsis Radix (Dang Shen, DS)</i>              | MOL000006 | Luteolin                     | T cell receptor alpha locus                         | TRA         | PubChem                 |
| <i>Codonopsis Radix (Dang Shen, DS)</i>              | MOL000006 | Luteolin                     | dopamine receptor D3                                | DRD3        | PubChem                 |
| <i>Codonopsis Radix (Dang Shen, DS)</i>              | MOL000006 | Luteolin                     | phosphatidylinositol-5-phosphate 4-kinase type      | PIPK42A     | PubChem                 |
| <i>Codonopsis Radix (Dang Shen, DS)</i>              | MOL000006 | Luteolin                     | matrix metalloproteinase 2                          | MMP2        | PubChem                 |
| <i>Codonopsis Radix (Dang Shen, DS)</i>              | MOL000006 | Luteolin                     | matrix metalloproteinase 3                          | MMP3        | PubChem                 |
| <i>Codonopsis Radix (Dang Shen, DS)</i>              | MOL000006 | Luteolin                     | matrix metalloproteinase 12                         | MMP12       | PubChem                 |
| <i>Codonopsis Radix (Dang Shen, DS)</i>              | MOL000006 | Luteolin                     | matrix metalloproteinase 13                         | MMP13       | PubChem                 |
| <i>Codonopsis Radix (Dang Shen, DS)</i>              | MOL000006 | Luteolin                     | G protein-coupled receptor 35                       | GPR35       | PubChem                 |
| <i>Codonopsis Radix (Dang Shen, DS)</i>              | MOL000006 | Luteolin                     | ATP binding cassette subfamily B member 1           | ABCB1       | PubChem                 |
| <i>Codonopsis Radix (Dang Shen, DS)</i>              | MOL000006 | Luteolin                     | spleen associated tyrosine kinase                   | SYK         | PubChem                 |
| <i>Codonopsis Radix (Dang Shen, DS)</i>              | MOL000006 | Luteolin                     | cystic fibrosis transmembrane conductance regulator | CFTR        | PubChem                 |
| <i>Codonopsis Radix (Dang Shen, DS)</i>              | MOL000006 | Luteolin                     | Rap guanine nucleotide exchange factor 3            | RAPGEF3     | PubChem                 |
| <i>Codonopsis Radix (Dang Shen, DS)</i>              | MOL000006 | Luteolin                     | poly(ADP-ribose) polymerase 1                       | PARP1       | PubChem                 |
| <i>Codonopsis Radix (Dang Shen, DS)</i>              | MOL000006 | Luteolin                     | frms related tyrosine kinase 3                      | FLT3        | PubChem                 |
| <i>Codonopsis Radix (Dang Shen, DS)</i>              | MOL000006 | Luteolin                     | tankyrase                                           | TNKS        | PubChem                 |
| <i>Codonopsis Radix (Dang Shen, DS)</i>              | MOL000006 | Luteolin                     | tankyrase 2                                         | TNKS2       | PubChem                 |
| <i>Codonopsis Radix (Dang Shen, DS)</i>              | MOL000006 | Luteolin                     | PC4 and SFRS1 interacting protein 1                 | PSIP1       | PubChem                 |
| <i>Codonopsis Radix (Dang Shen, DS)</i>              | MOL000006 | Luteolin                     | cytochrome b-245 beta chain                         | CYBB        | PubChem                 |
| <i>Codonopsis Radix (Dang Shen, DS)</i>              | MOL000006 | Luteolin                     | aldo-keto reductase family 1 member B               | AKR1B1      | PubChem                 |
| <i>Codonopsis Radix (Dang Shen, DS)</i>              | MOL000006 | Luteolin                     | arachidonate 5-lipoxygenase                         | ALOX5       | PubChem                 |
| <i>Codonopsis Radix (Dang Shen, DS)</i>              | MOL000006 | Luteolin                     | amyloid beta precursor protein                      | APP         | PubChem                 |
| <i>Codonopsis Radix (Dang Shen, DS)</i>              | MOL000006 | Luteolin                     | nuclear factor kappa B subunit 1                    | NFKB1       | PubChem                 |
| <i>Codonopsis Radix (Dang Shen, DS)</i>              | MOL000006 | Luteolin                     | nuclear factor kappa B subunit 2                    | NFKB2       | PubChem                 |
| <i>Codonopsis Radix (Dang Shen, DS)</i>              | MOL000006 | Luteolin                     | v-rel reticuloendotheliosis viral oncogene homolog  | RELA        | PubChem                 |
| <i>Codonopsis Radix (Dang Shen, DS)</i>              | MOL000006 | Luteolin                     | Casein kinase II subunit alpha                      | CSNK2A2     | PubChem                 |
| <i>Codonopsis Radix (Dang Shen, DS)</i>              | MOL000006 | Luteolin                     | Casein Kinase 2 Beta                                | CSNK2B      | PubChem                 |
| <i>Codonopsis Radix (Dang Shen, DS)</i>              | MOL000006 | Luteolin                     | Casein Kinase 2 Alpha 1                             | CSNK2A1     | PubChem                 |
| <i>Codonopsis Radix (Dang Shen, DS)</i>              | MOL000006 | Luteolin                     | death associated protein kinase 1                   | DAPK1       | PubChem                 |
| <i>Codonopsis Radix (Dang Shen, DS)</i>              | MOL000006 | Luteolin                     | transferrin                                         | TTR         | PubChem                 |
| <i>Codonopsis Radix (Dang Shen, DS)</i>              | MOL000006 | Luteolin                     | carbonic anhydrase 2                                | CA2         | PubChem                 |
| <i>Codonopsis Radix (Dang Shen, DS)</i>              | MOL000006 | Luteolin                     | carbonic anhydrase 7                                | CA7         | PubChem                 |
| <i>Codonopsis Radix (Dang Shen, DS)</i>              | MOL000006 | Luteolin                     | carbonic anhydrase 12                               | CA12        | PubChem                 |
| <i>Codonopsis Radix (Dang Shen, DS)</i>              | MOL000006 | Luteolin                     | carbonic anhydrase 4                                | CA4         | PubChem                 |
| <i>Codonopsis Radix (Dang Shen, DS)</i>              | MOL000006 | Luteolin                     | aldo-keto reductase family 1 member B10             | AKR1B10     | PubChem                 |
| <i>Codonopsis Radix (Dang Shen, DS)</i>              | MOL000006 | Luteolin                     | polybrom 1                                          | PRBM1       | PubChem                 |
| <i>Codonopsis Radix (Dang Shen, DS)</i>              | MOL000006 | Luteolin                     | dipeptidyl peptidase 4                              | DPPIV       | PubChem                 |
| <i>Codonopsis Radix (Dang Shen, DS)</i>              | MOL000006 | Luteolin                     | interferon beta 1                                   | IFNB1       | PubChem                 |
| <i>Codonopsis Radix (Dang Shen, DS)</i>              | MOL000006 | Luteolin                     | transcription factor binding to IGHM enhancer 3     | TFE3        | PubChem                 |
| <i>Codonopsis Radix (Dang Shen, DS)</i>              | MOL000006 | Luteolin                     | Cyclin-dependent kinase 5/CDK5 activator 1          | CDK5R1 CDK5 | Swiss Target Prediction |
| <i>Codonopsis Radix (Dang Shen, DS)</i>              | MOL000006 | Luteolin                     | Adenosine A1 receptor (by homology)                 | ADORA1      | Swiss Target Prediction |
| <i>Codonopsis Radix (Dang Shen, DS)</i>              | MOL000006 | Luteolin                     | DNA topoisomerase I (by homology)                   | TOP1        | Swiss Target Prediction |
| <i>Codonopsis Radix (Dang Shen, DS)</i>              | MOL003896 | -Methoxy-2-methyl isoflavone | cytochrome P450 family 3 subfamily A member         | CYP3A4      | PubChem                 |
| <i>Codonopsis Radix (Dang Shen, DS)</i>              | MOL003896 | -Methoxy-2-methyl isoflavone | cytochrome P450 family 1 subfamily A member         | CYP1A2      | PubChem                 |
| <i>Codonopsis Radix (Dang Shen, DS)</i>              | MOL003896 | -Methoxy-2-methyl isoflavone | cytochrome P450 family 2 subfamily C member         | CYP2C19     | PubChem                 |
| <i>Codonopsis Radix (Dang Shen, DS)</i>              | MOL003896 | -Methoxy-2-methyl isoflavone | cytochrome P450 family 2 subfamily C member         | CYP2C9      | PubChem                 |
| <i>Codonopsis Radix (Dang Shen, DS)</i>              | MOL003896 | -Methoxy-2-methyl isoflavone | cytochrome P450 family 2 subfamily D member         | CYP2D6      | PubChem                 |
| <i>Codonopsis Radix (Dang Shen, DS)</i>              | MOL003896 | -Methoxy-2-methyl isoflavone | TAR DNA binding protein                             | TARDBP      | PubChem                 |
| <i>Codonopsis Radix (Dang Shen, DS)</i>              | MOL002879 | Diop                         | Androgen Receptor                                   | AR          | PubChem                 |
| <i>Codonopsis Radix (Dang Shen, DS)</i>              | MOL002879 | Diop                         | GLI family zinc finger 3                            | GLI3        | PubChem                 |
| <i>Codonopsis Radix (Dang Shen, DS)</i>              | MOL002879 | Diop                         | nuclear receptor subfamily 1, group I, member 2     | NR1I2       | PubChem                 |
| <i>Codonopsis Radix (Dang Shen, DS)</i>              | MOL000449 | Stigmasteryl                 | DNA polymerase beta                                 | POLB        | PubChem                 |
| <i>Codonopsis Radix (Dang Shen, DS)</i>              | MOL008400 | Glycitein                    | Transcription factor AP-1                           | JUN         | STITCH                  |
| <i>Codonopsis Radix (Dang Shen, DS)</i>              | MOL008400 | Glycitein                    | Mitogen-activated protein kinase 3                  | MAPK3       | STITCH                  |
| <i>Codonopsis Radix (Dang Shen, DS)</i>              | MOL008400 | Glycitein                    | Transcription factor Sp1                            | SP1         | STITCH                  |
| <i>Codonopsis Radix (Dang Shen, DS)</i>              | MOL008400 | Glycitein                    | Collagenase 3                                       | MMP13       | STITCH                  |
| <i>Codonopsis Radix (Dang Shen, DS)</i>              | MOL008400 | Glycitein                    | Mitogen-activated protein kinase 1                  | MAPK1       | STITCH                  |
| <i>Codonopsis Radix (Dang Shen, DS)</i>              | MOL008400 | Glycitein                    | Cyclin-dependent kinase 4                           | CDK4        | STITCH                  |
| <i>Codonopsis Radix (Dang Shen, DS)</i>              | MOL008400 | Glycitein                    | Estrogen Receptor 1                                 | ESR1        | PubChem                 |
| <i>Codonopsis Radix (Dang Shen, DS)</i>              | MOL002140 | Periloryne                   | phosphodiesterase 5A                                | PDE5A       | PubChem                 |
