# Supplementary material for: Network Pharmacology Approach for Predicting Targets of Zishen Yutai Pills on Premature Ovarian Insufficiency
Source: Hindawi journal article supplement (doi:10.1155/2021/8215454), 2021-08-04
Supplement: f1 [file 8215454.f1.zip]

Supplementary Table 6A: Analysed Compound-Target Network

| ID   | Name                            | Type | Degree | AverageShortestPathLength | BetweennessCentrality | ClosenessCentrality | ClusteringCoefficient | Eccentricity | NeighborhoodConnectivity | NumberOfUndirectedEdges | PartnerOfMultiEdgedNodePairs | Radiality | Stress    | TopologicalCoefficient |
|------|---------------------------------|------|--------|---------------------------|-----------------------|---------------------|-----------------------|--------------|--------------------------|-------------------------|------------------------------|-----------|-----------|------------------------|
| D    | Quercetin                       | Herb | 384    | 2.891                     | 0.226                 | 0.346               | 0.000                 | 5.000        | 2.600                    | 384                     | 76                           | 0.982     | 1,431,752 | 0.053                  |
| C    | Kaempferol                      | Herb | 255    | 2.773                     | 0.236                 | 0.361               | 0.000                 | 5.000        | 3.563                    | 255                     | 84                           | 0.983     | 2,000,366 | 0.071                  |
| DS1  | Luteolin                        | Herb | 104    | 2.895                     | 0.243                 | 0.345               | 0.000                 | 5.000        | 2.854                    | 104                     | 1                            | 0.982     | 2,090,456 | 0.071                  |
| B    | Beta-sitosterol                 | Herb | 97     | 3.154                     | 0.091                 | 0.317               | 0.000                 | 7.000        | 4.400                    | 97                      | 11                           | 0.979     | 445,282   | 0.087                  |
| HSW2 | Emodin                          | Herb | 58     | 3.092                     | 0.114                 | 0.323               | 0.000                 | 5.000        | 3.310                    | 58                      | 0                            | 0.980     | 903,626   | 0.083                  |
| DZ7  | Helminthal                      | Herb | 48     | 3.367                     | 0.148                 | 0.297               | 0.000                 | 7.000        | 1.896                    | 48                      | 0                            | 0.977     | 878,370   | 0.045                  |
| HSW7 | Rhein                           | Herb | 47     | 3.031                     | 0.114                 | 0.330               | 0.000                 | 5.000        | 2.702                    | 47                      | 0                            | 0.980     | 497,304   | 0.063                  |
| LIJ1 | Calcium Phosphate               | Herb | 44     | 1.146                     | 0.991                 | 0.873               | 0.000                 | 3.000        | 1.023                    | 44                      | 0                            | 0.997     | 2,236     | 0.023                  |
| DZ1  | Mainin                          | Herb | 29     | 3.473                     | 0.062                 | 0.288               | 0.000                 | 7.000        | 2.519                    | 29                      | 2                            | 0.976     | 340,100   | 0.089                  |
| EJ2  | Histidine                       | Herb | 28     | 3.584                     | 0.123                 | 0.279               | 0.000                 | 7.000        | 2.107                    | 28                      | 0                            | 0.975     | 1,100,752 | 0.092                  |
| AY1  | (2R)-5,7-dihydroxy-2-(4-hydn    | Herb | 20     | 3.461                     | 0.040                 | 0.289               | 0.000                 | 5.000        | 3.550                    | 20                      | 0                            | 0.976     | 262,928   | 0.128                  |
| TSZ2 | Isorhamnetin                    | Herb | 20     | 3.355                     | 0.030                 | 0.298               | 0.000                 | 5.000        | 4.400                    | 20                      | 0                            | 0.977     | 298,758   | 0.200                  |
| EI1  | Arginine                        | Herb | 19     | 3.805                     | 0.090                 | 0.263               | 0.000                 | 7.000        | 1.842                    | 19                      | 0                            | 0.973     | 609,996   | 0.070                  |
| G    | Mandenol                        | Herb | 18     | 3.670                     | 0.018                 | 0.272               | 0.000                 | 7.000        | 4.200                    | 18                      | 8                            | 0.974     | 138,138   | 0.168                  |
| EI3  | Lysine                          | Herb | 16     | 5.260                     | 0.049                 | 0.190               | 0.000                 | 9.000        | 1.375                    | 16                      | 0                            | 0.959     | 536,370   | 0.125                  |
| F    | Glycifen                        | Herb | 16     | 3.773                     | 0.019                 | 0.265               | 0.000                 | 7.000        | 3.222                    | 16                      | 7                            | 0.973     | 72,418    | 0.139                  |
| GQZ4 | Atropine                        | Herb | 15     | 3.703                     | 0.045                 | 0.270               | 0.000                 | 5.000        | 2.133                    | 15                      | 0                            | 0.974     | 172,156   | 0.071                  |
| DZ2  | ent-Epicatechin                 | Herb | 14     | 3.736                     | 0.039                 | 0.268               | 0.000                 | 7.000        | 2.286                    | 14                      | 0                            | 0.973     | 246,400   | 0.092                  |
| HSW1 | Chrysophanol                    | Herb | 13     | 3.822                     | 0.012                 | 0.262               | 0.000                 | 7.000        | 4.077                    | 13                      | 0                            | 0.973     | 136,062   | 0.192                  |
| A    | Stigmastanol                    | Herb | 12     | 3.617                     | 0.011                 | 0.276               | 0.000                 | 7.000        | 5.429                    | 12                      | 1                            | 0.975     | 50,344    | 0.193                  |
| E    | Drip                            | Herb | 12     | 4.031                     | 0.012                 | 0.248               | 0.000                 | 7.000        | 5.167                    | 12                      | 3                            | 0.971     | 76,644    | 0.245                  |
| BIJ1 | Supraene                        | Herb | 11     | 5.023                     | 0.041                 | 0.199               | 0.000                 | 9.000        | 1.273                    | 11                      | 0                            | 0.961     | 188,790   | 0.091                  |
| DZ8  | Beta-Carotene                   | Herb | 10     | 3.932                     | 0.037                 | 0.254               | 0.000                 | 7.000        | 2.100                    | 10                      | 0                            | 0.972     | 134,424   | 0.100                  |
| HSW3 | Guajavarin                      | Herb | 10     | 3.535                     | 0.013                 | 0.283               | 0.000                 | 5.000        | 4.900                    | 10                      | 0                            | 0.975     | 94,070    | 0.260                  |
| GQZ5 | Bthyl isonolate                 | Herb | 9      | 3.596                     | 0.006                 | 0.278               | 0.000                 | 7.000        | 5.333                    | 9                       | 0                            | 0.975     | 50,918    | 0.228                  |
| DZ6  | Cinchonan-9-ol, 6'-methoxy-, (9 | Herb | 8      | 3.395                     | 0.021                 | 0.295               | 0.000                 | 5.000        | 3.875                    | 8                       | 0                            | 0.977     | 63,222    | 0.151                  |
| EI4  | Threonine                       | Herb | 8      | 5.293                     | 0.029                 | 0.189               | 0.000                 | 9.000        | 1.375                    | 8                       | 0                            | 0.958     | 193,088   | 0.125                  |
| GQZ3 | LAN                             | Herb | 8      | 4.412                     | 0.026                 | 0.227               | 0.000                 | 7.000        | 2.250                    | 8                       | 0                            | 0.967     | 153,418   | 0.139                  |
| HSW5 | Piced                           | Herb | 8      | 4.072                     | 0.025                 | 0.246               | 0.000                 | 7.000        | 2.625                    | 8                       | 0                            | 0.970     | 118,000   | 0.163                  |
| DZ2  | 7-Methoxy-2-methyl isoflavone   | Herb | 7      | 3.961                     | 0.003                 | 0.252               | 0.000                 | 5.000        | 5.286                    | 7                       | 0                            | 0.971     | 28,768    | 0.330                  |
| HSW4 | Physcion                        | Herb | 7      | 4.227                     | 0.013                 | 0.237               | 0.000                 | 7.000        | 2.857                    | 7                       | 0                            | 0.969     | 71,598    | 0.206                  |
| RS1  | Fumarine                        | Herb | 7      | 3.707                     | 0.010                 | 0.270               | 0.000                 | 5.000        | 4.571                    | 7                       | 0                            | 0.974     | 56,474    | 0.238                  |
| DZ5  | Cyclopamine                     | Herb | 6      | 3.814                     | 0.010                 | 0.262               | 0.000                 | 7.000        | 4.167                    | 6                       | 0                            | 0.973     | 64,376    | 0.211                  |
| GQZ1 | CLR                             | Herb | 5      | 3.576                     | 0.005                 | 0.280               | 0.000                 | 7.000        | 6.400                    | 5                       | 0                            | 0.975     | 28,222    | 0.300                  |
| RS3  | Arachidonate                    | Herb | 5      | 4.207                     | 0.006                 | 0.238               | 0.000                 | 7.000        | 3.600                    | 5                       | 0                            | 0.969     | 47,920    | 0.260                  |
| TSZ1 | CLR                             | Herb | 5      | 3.654                     | 0.003                 | 0.274               | 0.000                 | 7.000        | 5.800                    | 5                       | 0                            | 0.974     | 15,590    | 0.300                  |
| TSZ3 | Seamen                          | Herb | 5      | 3.699                     | 0.003                 | 0.270               | 0.000                 | 5.000        | 5.600                    | 5                       | 0                            | 0.974     | 25,114    | 0.354                  |
| TSZ4 | Matrine                         | Herb | 5      | 4.068                     | 0.009                 | 0.246               | 0.000                 | 7.000        | 2.800                    | 5                       | 0                            | 0.970     | 32,442    | 0.225                  |
| LIJ2 | Calcium Carbonate               | Herb | 4      | 2.813                     | 0.122                 | 0.356               | 0.000                 | 3.000        | 1.250                    | 4                       | 0                            | 0.959     | 276       | 0.250                  |
| RS2  | Ginsenoside rh2                 | Herb | 4      | 4.494                     | 0.012                 | 0.223               | 0.000                 | 7.000        | 2.500                    | 4                       | 0                            | 0.966     | 50,190    | 0.250                  |
| GQZ2 | Cycloartenol                    | Herb | 3      | 4.432                     | 0.006                 | 0.226               | 0.000                 | 7.000        | 4.333                    | 3                       | 0                            | 0.967     | 43,838    | 0.370                  |
| BIJ2 | Ohioensis-A                     | Herb | 2      | 5.055                     | 0.000                 | 0.198               | 0.000                 | 9.000        | 3.000                    | 2                       | 0                            | 0.961     | 1,170     | 0.500                  |
| DZ3  | Perfolylrine                    | Herb | 2      | 4.605                     | 0.004                 | 0.217               | 0.000                 | 7.000        | 3.500                    | 2                       | 0                            | 0.965     | 24,206    | 0.500                  |
| DZ3  | Yungamini                       | Herb | 2      | 3.961                     | 0.004                 | 0.252               | 0.000                 | 7.000        | 7.000                    | 2                       | 0                            | 0.971     | 15,596    | 0.500                  |
| DZ4  | (-)-Tabernemontanine            | Herb | 2      | 3.965                     | 0.004                 | 0.252               | 0.000                 | 7.000        | 6.500                    | 2                       | 0                            | 0.971     | 14,944    | 0.500                  |
| DZ9  | Syringetin                      | Herb | 2      | 3.965                     | 0.004                 | 0.252               | 0.000                 | 7.000        | 6.500                    | 2                       | 0                            | 0.971     | 14,944    | 0.500                  |
| HSW6 | Procyanidin B1 3'-O-gallate     | Herb | 2      | 4.264                     | 0.000                 | 0.235               | 0.000                 | 7.000        | 6.000                    | 2                       | 0                            | 0.968     | 608       | 0.625                  |
| SR1  | 24-Ethylcholest-4-en-3-one      | Herb | 2      | 5.113                     | 0.004                 | 0.196               | 0.000                 | 9.000        | 2.000                    | 2                       | 0                            | 0.960     | 17,970    | 0.500                  |

median degree 9.5
