# Supplementary material for: Network Pharmacology Approach for Predicting Targets of Zishen Yutai Pills on Premature Ovarian Insufficiency
Source: Hindawi journal article supplement (doi:10.1155/2021/8215454), 2021-08-04
Supplement: f1 [file 8215454.f1.zip]

| Supplementary Table S2A. Corresponding Targets of SDH  |           |               |                     |        |         |
|--------------------------------------------------------|-----------|---------------|---------------------|--------|---------|
| Herb Name                                              | Mol ID    | Chemical Name | Protein Name        | Symbol | Source  |
| <i>Rehmanniae Radix Praeparata (Shu Di Huang, SDH)</i> | MOL000359 | Sitosterol    |                     |        |         |
| <i>Rehmanniae Radix Praeparata (Shu Di Huang, SDH)</i> | MOL000449 | Stigmasterol  | DNA polymerase beta | POLB   | PubChem |
