# Supplementary material for: Network Pharmacology Approach for Predicting Targets of Zishen Yutai Pills on Premature Ovarian Insufficiency
Source: Hindawi journal article supplement (doi:10.1155/2021/8215454), 2021-08-04
Supplement: f1 [file 8215454.f1.zip]

| Herb Name                                      | Supplementary Table S2M. Corresponding Targets of HSW | Symbol                     | Sources                                    |
|------------------------------------------------|-------------------------------------------------------|----------------------------|--------------------------------------------|
| Herb Name                                      | Mol ID                                                | Chemical Name              | Protein Name                               |
| <i>Polygonum Multiflorum</i> (He Shou Wu, HSW) | MOL000358                                             | Beta-sitosterol            | DNA polymerase beta                        |
| <i>Polygonum Multiflorum</i> (He Shou Wu, HSW) | MOL000358                                             | Beta-sitosterol            | glycogen synthase kinase 3 beta            |
| <i>Polygonum Multiflorum</i> (He Shou Wu, HSW) | MOL000358                                             | Beta-sitosterol            | protein kinase AMP-activated non-catal     |
| <i>Polygonum Multiflorum</i> (He Shou Wu, HSW) | MOL000358                                             | Beta-sitosterol            | protein kinase AMP-activated non-catal     |
| <i>Polygonum Multiflorum</i> (He Shou Wu, HSW) | MOL000358                                             | Beta-sitosterol            | protein kinase AMP-activated non-catal     |
| <i>Polygonum Multiflorum</i> (He Shou Wu, HSW) | MOL000358                                             | Beta-sitosterol            | protein kinase AMP-activated catalytic     |
| <i>Polygonum Multiflorum</i> (He Shou Wu, HSW) | MOL000358                                             | Beta-sitosterol            | protein kinase AMP-activated catalytic     |
| <i>Polygonum Multiflorum</i> (He Shou Wu, HSW) | MOL000358                                             | Beta-sitosterol            | protein kinase AMP-activated non-catal     |
| <i>Polygonum Multiflorum</i> (He Shou Wu, HSW) | MOL000358                                             | Beta-sitosterol            | protein kinase AMP-activated non-catal     |
| <i>Polygonum Multiflorum</i> (He Shou Wu, HSW) | MOL000358                                             | Beta-sitosterol            | deipeptidyl peptidase 4                    |
| <i>Polygonum Multiflorum</i> (He Shou Wu, HSW) | MOL000358                                             | Beta-sitosterol            | coagulation factor II, thrombin            |
| <i>Polygonum Multiflorum</i> (He Shou Wu, HSW) | MOL001729                                             | Crysothanol                | NLR family, pyrin domain containing 3      |
| <i>Polygonum Multiflorum</i> (He Shou Wu, HSW) | MOL001729                                             | Crysothanol                | UDP glucucosyltransferase 1 family, p      |
| <i>Polygonum Multiflorum</i> (He Shou Wu, HSW) | MOL001729                                             | Crysothanol                | aldehyde dehydrogenase 1 family mem        |
| <i>Polygonum Multiflorum</i> (He Shou Wu, HSW) | MOL001729                                             | Crysothanol                | elastase, neutrophil expressed             |
| <i>Polygonum Multiflorum</i> (He Shou Wu, HSW) | MOL001729                                             | Crysothanol                | vitamin D receptor                         |
| <i>Polygonum Multiflorum</i> (He Shou Wu, HSW) | MOL001729                                             | Crysothanol                | nuclear factor, erythroid 2 like 2         |
| <i>Polygonum Multiflorum</i> (He Shou Wu, HSW) | MOL001729                                             | Crysothanol                | aryl hydrocarbon receptor                  |
| <i>Polygonum Multiflorum</i> (He Shou Wu, HSW) | MOL001729                                             | Crysothanol                | nuclear receptor subfamily 1 group 1 me    |
| <i>Polygonum Multiflorum</i> (He Shou Wu, HSW) | MOL001729                                             | Crysothanol                | estrogen related receptor alpha            |
| <i>Polygonum Multiflorum</i> (He Shou Wu, HSW) | MOL001729                                             | Crysothanol                | androgen receptor                          |
| <i>Polygonum Multiflorum</i> (He Shou Wu, HSW) | MOL001729                                             | Crysothanol                | histone deacetylase 9                      |
| <i>Polygonum Multiflorum</i> (He Shou Wu, HSW) | MOL001729                                             | Crysothanol                | progesterone receptor                      |
| <i>Polygonum Multiflorum</i> (He Shou Wu, HSW) | MOL000472                                             | Emodin                     | casein kinase 2, alpha 1 polypeptide       |
| <i>Polygonum Multiflorum</i> (He Shou Wu, HSW) | MOL000472                                             | Emodin                     | caspase 3, apoptosis-related cysteine pe   |
| <i>Polygonum Multiflorum</i> (He Shou Wu, HSW) | MOL000472                                             | Emodin                     | vascular endothelial growth factor A (41   |
| <i>Polygonum Multiflorum</i> (He Shou Wu, HSW) | MOL000472                                             | Emodin                     | cytochrome P450, family 1, subfamily B,    |
| <i>Polygonum Multiflorum</i> (He Shou Wu, HSW) | MOL000472                                             | Emodin                     | v-erb-b2 erythroblastic leukemia viral or  |
| <i>Polygonum Multiflorum</i> (He Shou Wu, HSW) | MOL000472                                             | Emodin                     | tumor necrosis factor (233 aa)             |
| <i>Polygonum Multiflorum</i> (He Shou Wu, HSW) | MOL000472                                             | Emodin                     | lymphocyte-specific protein tyrosine kin   |
| <i>Polygonum Multiflorum</i> (He Shou Wu, HSW) | MOL000472                                             | Emodin                     | myeloid cell leukemia sequence 1 (BCL2     |
| <i>Polygonum Multiflorum</i> (He Shou Wu, HSW) | MOL000472                                             | Emodin                     | chemokine (C-X-C motif) receptor 4         |
| <i>Polygonum Multiflorum</i> (He Shou Wu, HSW) | MOL000472                                             | Emodin                     | Pim-1 proto-oncogene, serine/threonine     |
| <i>Polygonum Multiflorum</i> (He Shou Wu, HSW) | MOL000472                                             | Emodin                     | cytochrome P450 family 1 subfamily A n     |
| <i>Polygonum Multiflorum</i> (He Shou Wu, HSW) | MOL000472                                             | Emodin                     | CDC like kinase 1                          |
| <i>Polygonum Multiflorum</i> (He Shou Wu, HSW) | MOL000472                                             | Emodin                     | Pim-2 proto-oncogene, serine/threonine     |
| <i>Polygonum Multiflorum</i> (He Shou Wu, HSW) | MOL000472                                             | Emodin                     | microtubule associated protein tau         |
| <i>Polygonum Multiflorum</i> (He Shou Wu, HSW) | MOL000472                                             | Emodin                     | cytochrome P450 family 2 subfamily D n     |
| <i>Polygonum Multiflorum</i> (He Shou Wu, HSW) | MOL000472                                             | Emodin                     | cytochrome P450 family 3 subfamily A n     |
| <i>Polygonum Multiflorum</i> (He Shou Wu, HSW) | MOL000472                                             | Emodin                     | cytochrome P450 family 2 subfamily C n     |
| <i>Polygonum Multiflorum</i> (He Shou Wu, HSW) | MOL000472                                             | Emodin                     | cytochrome P450 family 2 subfamily C n     |
| <i>Polygonum Multiflorum</i> (He Shou Wu, HSW) | MOL000472                                             | Emodin                     | aldehyde dehydrogenase 1 family mem        |
| <i>Polygonum Multiflorum</i> (He Shou Wu, HSW) | MOL000472                                             | Emodin                     | thrombospondin                             |
| <i>Polygonum Multiflorum</i> (He Shou Wu, HSW) | MOL000472                                             | Emodin                     | SUMO peptidase family member, NEDD         |
| <i>Polygonum Multiflorum</i> (He Shou Wu, HSW) | MOL000472                                             | Emodin                     | potassium voltage-gated channel subfam     |
| <i>Polygonum Multiflorum</i> (He Shou Wu, HSW) | MOL000472                                             | Emodin                     | SUMO specific peptidase 6                  |
| <i>Polygonum Multiflorum</i> (He Shou Wu, HSW) | MOL000472                                             | Emodin                     | estrogen receptor 1                        |
| <i>Polygonum Multiflorum</i> (He Shou Wu, HSW) | MOL000472                                             | Emodin                     | estrogen receptor 2                        |
| <i>Polygonum Multiflorum</i> (He Shou Wu, HSW) | MOL000472                                             | Emodin                     | SUMO specific peptidase 7                  |
| <i>Polygonum Multiflorum</i> (He Shou Wu, HSW) | MOL000472                                             | Emodin                     | phospholipase A2 group VII                 |
| <i>Polygonum Multiflorum</i> (He Shou Wu, HSW) | MOL000472                                             | Emodin                     | DNA polymerase beta                        |
| <i>Polygonum Multiflorum</i> (He Shou Wu, HSW) | MOL000472                                             | Emodin                     | flag structure-specific endonuclease 1     |
| <i>Polygonum Multiflorum</i> (He Shou Wu, HSW) | MOL000472                                             | Emodin                     | chromobox 1                                |
| <i>Polygonum Multiflorum</i> (He Shou Wu, HSW) | MOL000472                                             | Emodin                     | M-phase phosphoprotein 8                   |
| <i>Polygonum Multiflorum</i> (He Shou Wu, HSW) | MOL000472                                             | Emodin                     | protein tyrosine phosphatase 4A3           |
| <i>Polygonum Multiflorum</i> (He Shou Wu, HSW) | MOL000472                                             | Emodin                     | casein kinase 2 beta                       |
| <i>Polygonum Multiflorum</i> (He Shou Wu, HSW) | MOL000472                                             | Emodin                     | nuclear factor, erythroid 2 like 2         |
| <i>Polygonum Multiflorum</i> (He Shou Wu, HSW) | MOL000472                                             | Emodin                     | C-X-C motif chemokine ligand 8             |
| <i>Polygonum Multiflorum</i> (He Shou Wu, HSW) | MOL000472                                             | Emodin                     | aryl hydrocarbon receptor                  |
| <i>Polygonum Multiflorum</i> (He Shou Wu, HSW) | MOL000472                                             | Emodin                     | RAR related orphan receptor C              |
| <i>Polygonum Multiflorum</i> (He Shou Wu, HSW) | MOL000472                                             | Emodin                     | phosphatidylinositol-5-phosphate 4-kin     |
| <i>Polygonum Multiflorum</i> (He Shou Wu, HSW) | MOL000472                                             | Emodin                     | tyrosyl-DNA phosphodiesterase 1            |
| <i>Polygonum Multiflorum</i> (He Shou Wu, HSW) | MOL000472                                             | Emodin                     | nuclear receptor subfamily 3 group C me    |
| <i>Polygonum Multiflorum</i> (He Shou Wu, HSW) | MOL000472                                             | Emodin                     | androgen receptor                          |
| <i>Polygonum Multiflorum</i> (He Shou Wu, HSW) | MOL000472                                             | Emodin                     | cytochrome P450 family 19 subfamily A      |
| <i>Polygonum Multiflorum</i> (He Shou Wu, HSW) | MOL000472                                             | Emodin                     | peroxisome proliferator activated recept   |
| <i>Polygonum Multiflorum</i> (He Shou Wu, HSW) | MOL000472                                             | Emodin                     | nuclear receptor subfamily 1 group II me   |
| <i>Polygonum Multiflorum</i> (He Shou Wu, HSW) | MOL000472                                             | Emodin                     | casein kinase 2 alpha 2                    |
| <i>Polygonum Multiflorum</i> (He Shou Wu, HSW) | MOL000472                                             | Emodin                     | retinoic acid receptor alpha               |
| <i>Polygonum Multiflorum</i> (He Shou Wu, HSW) | MOL000472                                             | Emodin                     | nuclear receptor subfamily 1 group 1 me    |
| <i>Polygonum Multiflorum</i> (He Shou Wu, HSW) | MOL000472                                             | Emodin                     | epoxide hydrolase 2                        |
| <i>Polygonum Multiflorum</i> (He Shou Wu, HSW) | MOL000472                                             | Emodin                     | histone deacetylase 9                      |
| <i>Polygonum Multiflorum</i> (He Shou Wu, HSW) | MOL000472                                             | Emodin                     | GLI family zinc finger 3                   |
| <i>Polygonum Multiflorum</i> (He Shou Wu, HSW) | MOL000472                                             | Emodin                     | aldo-keto reductase family 1 member B      |
| <i>Polygonum Multiflorum</i> (He Shou Wu, HSW) | MOL000472                                             | Emodin                     | progesterone receptor                      |
| <i>Polygonum Multiflorum</i> (He Shou Wu, HSW) | MOL000472                                             | Emodin                     | nuclear receptor subfamily 1, group I, m   |
| <i>Polygonum Multiflorum</i> (He Shou Wu, HSW) | MOL000472                                             | Emodin                     | natriuretic peptide receptor 1             |
| <i>Polygonum Multiflorum</i> (He Shou Wu, HSW) | MOL000472                                             | Emodin                     | N-terminal Xaa-Pro-Lys N-methyltransfe     |
| <i>Polygonum Multiflorum</i> (He Shou Wu, HSW) | MOL000472                                             | Emodin                     | acetylcholinesterase (Cartwright blood g   |
| <i>Polygonum Multiflorum</i> (He Shou Wu, HSW) | MOL000472                                             | Emodin                     | cytochrome P450 family 1 subfamily A n     |
| <i>Polygonum Multiflorum</i> (He Shou Wu, HSW) | MOL000702                                             | Guajavarin                 | enhancer of zeste-2 polycomb repressiv     |
| <i>Polygonum Multiflorum</i> (He Shou Wu, HSW) | MOL000702                                             | Guajavarin                 | Aldehyde reductase (by homology)           |
| <i>Polygonum Multiflorum</i> (He Shou Wu, HSW) | MOL000702                                             | Guajavarin                 | Carbonic anhydrase II                      |
| <i>Polygonum Multiflorum</i> (He Shou Wu, HSW) | MOL000702                                             | Guajavarin                 | Carbonic anhydrase VII                     |
| <i>Polygonum Multiflorum</i> (He Shou Wu, HSW) | MOL000702                                             | Guajavarin                 | Carbonic anhydrase XII                     |
| <i>Polygonum Multiflorum</i> (He Shou Wu, HSW) | MOL000702                                             | Guajavarin                 | Carbonic anhydrase IV                      |
| <i>Polygonum Multiflorum</i> (He Shou Wu, HSW) | MOL000702                                             | Guajavarin                 | NADPH oxidase 4                            |
| <i>Polygonum Multiflorum</i> (He Shou Wu, HSW) | MOL000702                                             | Guajavarin                 | Adrenergic receptor alpha-2                |
| <i>Polygonum Multiflorum</i> (He Shou Wu, HSW) | MOL000702                                             | Guajavarin                 | Acetylcholinesterase                       |
| <i>Polygonum Multiflorum</i> (He Shou Wu, HSW) | MOL000476                                             | Physcion                   | UDP glucucosyltransferase 1 family, p      |
| <i>Polygonum Multiflorum</i> (He Shou Wu, HSW) | MOL000476                                             | Physcion                   | acetyl-CoA carboxylase alpha (2383 aa)     |
| <i>Polygonum Multiflorum</i> (He Shou Wu, HSW) | MOL000476                                             | Physcion                   | maltese glucamylase                        |
| <i>Polygonum Multiflorum</i> (He Shou Wu, HSW) | MOL000476                                             | Physcion                   | elastase, neutrophil expressed             |
| <i>Polygonum Multiflorum</i> (He Shou Wu, HSW) | MOL000476                                             | Physcion                   | vitamin D receptor                         |
| <i>Polygonum Multiflorum</i> (He Shou Wu, HSW) | MOL000476                                             | Physcion                   | phosphogluconate dehydrogenase             |
| <i>Polygonum Multiflorum</i> (He Shou Wu, HSW) | MOL013289                                             | Picidid                    | growth factor, augmentin of liver regene   |
| <i>Polygonum Multiflorum</i> (He Shou Wu, HSW) | MOL013289                                             | Picidid                    | DNA polymerase beta                        |
| <i>Polygonum Multiflorum</i> (He Shou Wu, HSW) | MOL013289                                             | Picidid                    | potassium calcium-activated channel sul    |
| <i>Polygonum Multiflorum</i> (He Shou Wu, HSW) | MOL013289                                             | Picidid                    | leucine rich repeat containing 26          |
| <i>Polygonum Multiflorum</i> (He Shou Wu, HSW) | MOL013289                                             | Picidid                    | potassium calcium-activated channel sul    |
| <i>Polygonum Multiflorum</i> (He Shou Wu, HSW) | MOL013289                                             | Picidid                    | potassium calcium-activated channel sul    |
| <i>Polygonum Multiflorum</i> (He Shou Wu, HSW) | MOL013289                                             | Picidid                    | potassium calcium-activated channel sul    |
| <i>Polygonum Multiflorum</i> (He Shou Wu, HSW) | MOL002268                                             | Procyandin B1 3'-O-gallate | squalene epoxidase                         |
| <i>Polygonum Multiflorum</i> (He Shou Wu, HSW) | MOL002268                                             | Rhien                      | retinoid X receptor, alpha                 |
| <i>Polygonum Multiflorum</i> (He Shou Wu, HSW) | MOL002268                                             | Rhien                      | fat mass and obesity associated            |
| <i>Polygonum Multiflorum</i> (He Shou Wu, HSW) | MOL002268                                             | Rhien                      | peroxisome proliferator-activated recept   |
| <i>Polygonum Multiflorum</i> (He Shou Wu, HSW) | MOL002268                                             | Rhien                      | uncoupling protein 1 (mitochondrial, prot  |
| <i>Polygonum Multiflorum</i> (He Shou Wu, HSW) | MOL002268                                             | Rhien                      | peroxisome proliferator-activated recept   |
| <i>Polygonum Multiflorum</i> (He Shou Wu, HSW) | MOL002268                                             | Rhien                      | dynamin 1-like (736 aa)                    |
| <i>Polygonum Multiflorum</i> (He Shou Wu, HSW) | MOL002268                                             | Rhien                      | v-rel reticuloendotheliosis viral oncogen  |
| <i>Polygonum Multiflorum</i> (He Shou Wu, HSW) | MOL002268                                             | Rhien                      | vascular endothelial growth factor A (41   |
| <i>Polygonum Multiflorum</i> (He Shou Wu, HSW) | MOL002268                                             | Rhien                      | nuclear factor of kappa light polypeptide  |
| <i>Polygonum Multiflorum</i> (He Shou Wu, HSW) | MOL002268                                             | Rhien                      | dynamin 1                                  |
| <i>Polygonum Multiflorum</i> (He Shou Wu, HSW) | MOL002268                                             | Rhien                      | heat shock protein 90 alpha family class   |
| <i>Polygonum Multiflorum</i> (He Shou Wu, HSW) | MOL002268                                             | Rhien                      | protein tyrosine phosphatase non-recept    |
| <i>Polygonum Multiflorum</i> (He Shou Wu, HSW) | MOL002268                                             | Rhien                      | arachidonate 15-lipoxygenase               |
| <i>Polygonum Multiflorum</i> (He Shou Wu, HSW) | MOL002268                                             | Rhien                      | MC11 apoptosis regulator, BCL2 family n    |
| <i>Polygonum Multiflorum</i> (He Shou Wu, HSW) | MOL002268                                             | Rhien                      | microtubule associated protein tau         |
| <i>Polygonum Multiflorum</i> (He Shou Wu, HSW) | MOL002268                                             | Rhien                      | RB binding protein 9, serine hydrolase     |
| <i>Polygonum Multiflorum</i> (He Shou Wu, HSW) | MOL002268                                             | Rhien                      | glutathione S-transferase omega 1          |
| <i>Polygonum Multiflorum</i> (He Shou Wu, HSW) | MOL002268                                             | Rhien                      | BCL2 like 1                                |
| <i>Polygonum Multiflorum</i> (He Shou Wu, HSW) | MOL002268                                             | Rhien                      | BLM RecQ like helicase                     |
| <i>Polygonum Multiflorum</i> (He Shou Wu, HSW) | MOL002268                                             | Rhien                      | phospholipase A2 group VI                  |
| <i>Polygonum Multiflorum</i> (He Shou Wu, HSW) | MOL002268                                             | Rhien                      | DNA polymerase beta                        |
| <i>Polygonum Multiflorum</i> (He Shou Wu, HSW) | MOL002268                                             | Rhien                      | platelet activating factor acetylhydrolasi |
| <i>Polygonum Multiflorum</i> (He Shou Wu, HSW) | MOL002268                                             | Rhien                      | CTD small phosphatase 1                    |
| <i>Polygonum Multiflorum</i> (He Shou Wu, HSW) | MOL002268                                             | Rhien                      | C-X motif chemokine receptor 6             |
| <i>Polygonum Multiflorum</i> (He Shou Wu, HSW) | MOL002268                                             | Rhien                      | hexokinase domain containing 1             |
| <i>Polygonum Multiflorum</i> (He Shou Wu, HSW) | MOL002268                                             | Rhien                      | bromodomain adjacent to zinc finger do     |
| <i>Polygonum Multiflorum</i> (He Shou Wu, HSW) | MOL002268                                             | Rhien                      | DNA methyltransferase 1                    |
| <i>Polygonum Multiflorum</i> (He Shou Wu, HSW) | MOL002268                                             | Rhien                      | DNA polymerase kappa                       |
| <i>Polygonum Multiflorum</i> (He Shou Wu, HSW) | MOL002268                                             | Rhien                      | DNA polymerase iota                        |
| <i>Polygonum Multiflorum</i> (He Shou Wu, HSW) | MOL002268                                             | Rhien                      | DNA polymerase eta                         |
| <i>Polygonum Multiflorum</i> (He Shou Wu, HSW) | MOL002268                                             | Rhien                      | C-X-C motif chemokine receptor 6           |
| <i>Polygonum Multiflorum</i> (He Shou Wu, HSW) | MOL002268                                             | Rhien                      | glutaminase                                |
| <i>Polygonum Multiflorum</i> (He Shou Wu, HSW) | MOL002268                                             | Rhien                      | tumor protein p53                          |
| <i>Polygonum Multiflorum</i> (He Shou Wu, HSW) | MOL002268                                             | Rhien                      | RB binding protein 8, endonuclease         |
| <i>Polygonum Multiflorum</i> (He Shou Wu, HSW) | MOL002268                                             | Rhien                      | SIX homeobox 1                             |
| <i>Polygonum Multiflorum</i> (He Shou Wu, HSW) | MOL002268                                             | Rhien                      | WRN RecQ like helicase                     |
| <i>Polygonum Multiflorum</i> (He Shou Wu, HSW) | MOL002268                                             | Rhien                      | RAR related orphan receptor C              |
| <i>Polygonum Multiflorum</i> (He Shou Wu, HSW) | MOL002268                                             | Rhien                      | phosphatidylinositol-5-phosphate 4-kin     |
| <i>Polygonum Multiflorum</i> (He Shou Wu, HSW) | MOL002268                                             | Rhien                      | SIRT5                                      |
| <i>Polygonum Multiflorum</i> (He Shou Wu, HSW) | MOL002268                                             | Rhien                      | protein arginine methyltransferase 1       |
| <i>Polygonum Multiflorum</i> (He Shou Wu, HSW) | MOL002268                                             | Rhien                      | caspase 6                                  |
| <i>Polygonum Multiflorum</i> (He Shou Wu, HSW) | MOL002268                                             | Rhien                      | Rap structure-specific endonuclease 1      |
| <i>Polygonum Multiflorum</i> (He Shou Wu, HSW) | MOL002268                                             | Rhien                      | estrogen receptor 1                        |
| <i>Polygonum Multiflorum</i> (He Shou Wu, HSW) | MOL002268                                             | Rhien                      | nuclear factor, erythroid 2 like 2         |
| <i>Polygonum Multiflorum</i> (He Shou Wu, HSW) | MOL002268                                             | Rhien                      | butyrylcholinesterase                      |
| <i>Polygonum Multiflorum</i> (He Shou Wu, HSW) | MOL002268                                             | Rhien                      | histone deacetylase 9                      |
