# Supplementary material for: Network Pharmacology Approach for Predicting Targets of Zishen Yutai Pills on Premature Ovarian Insufficiency
Source: Hindawi journal article supplement (doi:10.1155/2021/8215454), 2021-08-04
Supplement: f1 [file 8215454.f1.zip]

Supplementary Table S2D. Corresponding Targets of BJT

| Herb Name                                           | Mol ID    | Chemical Name   | Protein Name                                        | Symbol   | Sources |
|-----------------------------------------------------|-----------|-----------------|-----------------------------------------------------|----------|---------|
| <i>Morindae Officinalis Radix (Ba Ji Tian, BJT)</i> | MOL001506 | Supraene        | farnesyltransferase, CAAX box, alpha                | FNTA     | STITCH  |
| <i>Morindae Officinalis Radix (Ba Ji Tian, BJT)</i> | MOL001506 | Supraene        | GDP dissociation inhibitor 1                        | GDI1     | STITCH  |
| <i>Morindae Officinalis Radix (Ba Ji Tian, BJT)</i> | MOL001506 | Supraene        | farnesyltransferase, CAAX box, beta                 | FNTB     | STITCH  |
| <i>Morindae Officinalis Radix (Ba Ji Tian, BJT)</i> | MOL001506 | Supraene        | Rho GDP dissociation inhibitor (GDI) alpha          | ARHGDI A | STITCH  |
| <i>Morindae Officinalis Radix (Ba Ji Tian, BJT)</i> | MOL001506 | Supraene        | Ras-related C3 botulinum toxin substrate 1 (rho fa  | RAC1     | STITCH  |
| <i>Morindae Officinalis Radix (Ba Ji Tian, BJT)</i> | MOL001506 | Supraene        | cell division cycle 42 (GTP binding protein, 25kDa) | CDC42    | STITCH  |
| <i>Morindae Officinalis Radix (Ba Ji Tian, BJT)</i> | MOL001506 | Supraene        | protein geranylgeranyltransferase type I, beta sul  | PGGT1B   | STITCH  |
| <i>Morindae Officinalis Radix (Ba Ji Tian, BJT)</i> | MOL001506 | Supraene        | Rab geranylgeranyltransferase, beta subunit         | RABGGTB  | STITCH  |
| <i>Morindae Officinalis Radix (Ba Ji Tian, BJT)</i> | MOL001506 | Supraene        | RAB7A, member RAS oncogene family                   | RAB7A    | STITCH  |
| <i>Morindae Officinalis Radix (Ba Ji Tian, BJT)</i> | MOL001506 | Supraene        | Rab geranylgeranyltransferase, alpha subunit        | RABGGTA  | STITCH  |
| <i>Morindae Officinalis Radix (Ba Ji Tian, BJT)</i> | MOL000358 | Beta-sitosterol | DNA polymerase beta                                 | POLB     | PubChem |
| <i>Morindae Officinalis Radix (Ba Ji Tian, BJT)</i> | MOL000358 | Beta-sitosterol | glycogen synthase kinase 3 beta                     | GSK3B    | PubChem |
| <i>Morindae Officinalis Radix (Ba Ji Tian, BJT)</i> | MOL000358 | Beta-sitosterol | protein kinase AMP-activated non-catalytic subur    | PRKAB2   | PubChem |
| <i>Morindae Officinalis Radix (Ba Ji Tian, BJT)</i> | MOL000358 | Beta-sitosterol | protein kinase AMP-activated non-catalytic subur    | PRKAG3   | PubChem |
| <i>Morindae Officinalis Radix (Ba Ji Tian, BJT)</i> | MOL000358 | Beta-sitosterol | protein kinase AMP-activated non-catalytic subur    | PRKAG1   | PubChem |
| <i>Morindae Officinalis Radix (Ba Ji Tian, BJT)</i> | MOL000358 | Beta-sitosterol | protein kinase AMP-activated catalytic subunit al   | PRKAA1   | PubChem |
| <i>Morindae Officinalis Radix (Ba Ji Tian, BJT)</i> | MOL000358 | Beta-sitosterol | protein kinase AMP-activated catalytic subunit al   | PRKAA2   | PubChem |
| <i>Morindae Officinalis Radix (Ba Ji Tian, BJT)</i> | MOL000358 | Beta-sitosterol | protein kinase AMP-activated non-catalytic subur    | PRKAB1   | PubChem |
| <i>Morindae Officinalis Radix (Ba Ji Tian, BJT)</i> | MOL000358 | Beta-sitosterol | protein kinase AMP-activated non-catalytic subur    | PRKAG2   | PubChem |
| <i>Morindae Officinalis Radix (Ba Ji Tian, BJT)</i> | MOL000358 | Beta-sitosterol | dipeptidyl peptidase 4                              | DPP4     | PubChem |
| <i>Morindae Officinalis Radix (Ba Ji Tian, BJT)</i> | MOL000358 | Beta-sitosterol | coagulation factor II, thrombin                     | F2       | PubChem |
| <i>Morindae Officinalis Radix (Ba Ji Tian, BJT)</i> | MOL009562 | Ohioensin-A     | protein tyrosine phosphatase non-receptor type 1    | PTPN1    | PubChem |
| <i>Morindae Officinalis Radix (Ba Ji Tian, BJT)</i> | MOL002879 | Diop            | Androgen Receptor                                   | AR       | PubChem |
| <i>Morindae Officinalis Radix (Ba Ji Tian, BJT)</i> | MOL002879 | Diop            | GLI family zinc finger 3                            | GLI3     | PubChem |
| <i>Morindae Officinalis Radix (Ba Ji Tian, BJT)</i> | MOL002879 | Diop            | nuclear receptor subfamily 1, group I, member 2     | NR112    | PubChem |

Swiss Target Prediction
