# Supplementary material for: Network Pharmacology Approach for Predicting Targets of Zishen Yutai Pills on Premature Ovarian Insufficiency
Source: Hindawi journal article supplement (doi:10.1155/2021/8215454), 2021-08-04
Supplement: f1 [file 8215454.f1.zip]

| Supplementary Table S2N. Corresponding Targets of EJ |           |               |                                         |          |          |                    |        |
|------------------------------------------------------|-----------|---------------|-----------------------------------------|----------|----------|--------------------|--------|
| Herb Name                                            | Mol ID    | Chemical Name | Protein Name                            | Symbol   | Sources  |                    |        |
| <i>Colla Corrii Asini (EJiao, EJ)</i>                | MOL000054 | Arginine      | cytochrome P450 family 1 subfamil       | CYP1A2   | PubChem  | DrugBank<br>STITCH | STITCH |
| <i>Colla Corrii Asini (EJiao, EJ)</i>                | MOL000054 | Arginine      | nitric oxide synthase 3                 | NOS3     | PubChem  |                    |        |
| <i>Colla Corrii Asini (EJiao, EJ)</i>                | MOL000054 | Arginine      | nitric oxide synthase 2                 | NOS2     | PubChem  |                    |        |
| <i>Colla Corrii Asini (EJiao, EJ)</i>                | MOL000054 | Arginine      | nitric oxide synthase 1                 | NOS1     | PubChem  |                    |        |
| <i>Colla Corrii Asini (EJiao, EJ)</i>                | MOL000054 | Arginine      | Solute Carrier Family 7 Member 3        | SLC7A3   | DrugBank | STITCH             |        |
| <i>Colla Corrii Asini (EJiao, EJ)</i>                | MOL000054 | Arginine      | Antizyme Inhibitor 2                    | AZIN2    | DrugBank |                    |        |
| <i>Colla Corrii Asini (EJiao, EJ)</i>                | MOL000054 | Arginine      | Arginine decarboxylase                  | ASL      | DrugBank |                    |        |
| <i>Colla Corrii Asini (EJiao, EJ)</i>                | MOL000054 | Arginine      | Argininosuccinate lyase                 | SLC7A1   | DrugBank |                    |        |
| <i>Colla Corrii Asini (EJiao, EJ)</i>                | MOL000054 | Arginine      | Arginase-2, mitochondrial               | ARG2     | DrugBank | STITCH             |        |
| <i>Colla Corrii Asini (EJiao, EJ)</i>                | MOL000054 | Arginine      | Solute Carrier Family 7 Member 4        | SLC7A4   | DrugBank |                    |        |
| <i>Colla Corrii Asini (EJiao, EJ)</i>                | MOL000054 | Arginine      | Argininosuccinate synthase              | ASS1     | DrugBank |                    |        |
| <i>Colla Corrii Asini (EJiao, EJ)</i>                | MOL000054 | Arginine      | protein arginine methyltransferase 1    | PRMT1    | STITCH   |                    |        |
| <i>Colla Corrii Asini (EJiao, EJ)</i>                | MOL000054 | Arginine      | serum response factor (c-fos serum r    | SRF      | STITCH   | STITCH             |        |
| <i>Colla Corrii Asini (EJiao, EJ)</i>                | MOL000054 | Arginine      | coactivator-associated arginine meth    | CARM1    | STITCH   |                    |        |
| <i>Colla Corrii Asini (EJiao, EJ)</i>                | MOL000054 | Arginine      | protein arginine methyltransferase      | PRMT5    | STITCH   |                    |        |
| <i>Colla Corrii Asini (EJiao, EJ)</i>                | MOL000054 | Arginine      | adenosylmethionine decarboxylase 1      | AMD1     | STITCH   |                    |        |
| <i>Colla Corrii Asini (EJiao, EJ)</i>                | MOL000054 | Arginine      | ornithine decarboxylase 1               | ODC1     | STITCH   | STITCH             |        |
| <i>Colla Corrii Asini (EJiao, EJ)</i>                | MOL000054 | Arginine      | Glucagon                                | GCG      | STITCH   |                    |        |
| <i>Colla Corrii Asini (EJiao, EJ)</i>                | MOL000071 | Histidine     | Carbonic Anhydrase 1                    | CA1      | Pubchem  |                    |        |
| <i>Colla Corrii Asini (EJiao, EJ)</i>                | MOL000071 | Histidine     | Carbonic Anhydrase 2                    | CA2      | Pubchem  | STITCH             |        |
| <i>Colla Corrii Asini (EJiao, EJ)</i>                | MOL000071 | Histidine     | Carbonic Anhydrase 4                    | CA4      | Pubchem  |                    |        |
| <i>Colla Corrii Asini (EJiao, EJ)</i>                | MOL000071 | Histidine     | Carbonic Anhydrase 9                    | CA9      | Pubchem  |                    |        |
| <i>Colla Corrii Asini (EJiao, EJ)</i>                | MOL000071 | Histidine     | Carbonic Anhydrase 7                    | CA7      | Pubchem  |                    |        |
| <i>Colla Corrii Asini (EJiao, EJ)</i>                | MOL000071 | Histidine     | Carbonic Anhydrase 14                   | CA14     | Pubchem  | STITCH             |        |
| <i>Colla Corrii Asini (EJiao, EJ)</i>                | MOL000071 | Histidine     | Carbonic Anhydrase 5A                   | CA5A     | Pubchem  |                    |        |
| <i>Colla Corrii Asini (EJiao, EJ)</i>                | MOL000071 | Histidine     | Carbonic Anhydrase 5B                   | CA5B     | Pubchem  |                    |        |
| <i>Colla Corrii Asini (EJiao, EJ)</i>                | MOL000071 | Histidine     | Carbonic Anhydrase 6                    | CA6      | Pubchem  |                    |        |
| <i>Colla Corrii Asini (EJiao, EJ)</i>                | MOL000071 | Histidine     | solute carrier family 15 member 4       | SLC15A4  | Pubchem  | STITCH             |        |
| <i>Colla Corrii Asini (EJiao, EJ)</i>                | MOL000071 | Histidine     | solute carrier family 15 member 3       | SLC15A3  | Pubchem  |                    |        |
| <i>Colla Corrii Asini (EJiao, EJ)</i>                | MOL000071 | Histidine     | signal regulatory protein alpha         | SIRPA    | Pubchem  |                    |        |
| <i>Colla Corrii Asini (EJiao, EJ)</i>                | MOL000071 | Histidine     | CD47 molecule                           | CD47     | Pubchem  |                    |        |
| <i>Colla Corrii Asini (EJiao, EJ)</i>                | MOL000071 | Histidine     | solute carrier family 7 member 5        | SLC7A5   | Pubchem  | STITCH             |        |
| <i>Colla Corrii Asini (EJiao, EJ)</i>                | MOL000071 | Histidine     | Histidine decarboxylase                 | HDC      | DrugBank |                    |        |
| <i>Colla Corrii Asini (EJiao, EJ)</i>                | MOL000071 | Histidine     | Histidine-tRNA ligase, cytoplasmic      | HARS     | DrugBank |                    |        |
| <i>Colla Corrii Asini (EJiao, EJ)</i>                | MOL000071 | Histidine     | Sodium-coupled neutral amino acid t     | SLC38A3  | DrugBank |                    |        |
| <i>Colla Corrii Asini (EJiao, EJ)</i>                | MOL000071 | Histidine     | Histidine ammonia-lyase                 | HAL      | DrugBank | STITCH             |        |
| <i>Colla Corrii Asini (EJiao, EJ)</i>                | MOL000071 | Histidine     | eukaryotic translation elongation fact  | EEF2     | STITCH   |                    |        |
| <i>Colla Corrii Asini (EJiao, EJ)</i>                | MOL000071 | Histidine     | catalase                                | CAT      | STITCH   |                    |        |
| <i>Colla Corrii Asini (EJiao, EJ)</i>                | MOL000071 | Histidine     | Myoglobin                               | MB       | STITCH   |                    |        |
| <i>Colla Corrii Asini (EJiao, EJ)</i>                | MOL000071 | Histidine     | Tyrosinase                              | TYR      | STITCH   | STITCH             |        |
| <i>Colla Corrii Asini (EJiao, EJ)</i>                | MOL000071 | Histidine     | PR domain containing 10 (1160 aa)       | PRDM10   | STITCH   |                    |        |
| <i>Colla Corrii Asini (EJiao, EJ)</i>                | MOL000071 | Histidine     | glutamate-ammonia ligase                | GLUL     | STITCH   |                    |        |
| <i>Colla Corrii Asini (EJiao, EJ)</i>                | MOL000071 | Histidine     | solute carrier family 39 (zinc transpor | SLC39A6  | STITCH   |                    |        |
| <i>Colla Corrii Asini (EJiao, EJ)</i>                | MOL000071 | Histidine     | heme oxygenase (decycling) 2            | HMOX2    | STITCH   | DrugBank           |        |
| <i>Colla Corrii Asini (EJiao, EJ)</i>                | MOL000055 | Lysine        | solute carrier family 7 member 1        | SLC7A1   | DrugBank |                    |        |
| <i>Colla Corrii Asini (EJiao, EJ)</i>                | MOL000055 | Lysine        | Solute Carrier Family 7 Member 4        | SLC7A4   | DrugBank |                    |        |
| <i>Colla Corrii Asini (EJiao, EJ)</i>                | MOL000055 | Lysine        | Solute Carrier Family 7 Member 3        | SLC7A3   | DrugBank |                    |        |
| <i>Colla Corrii Asini (EJiao, EJ)</i>                | MOL000055 | Lysine        | Solute Carrier Family 7 Member 2        | SLC7A2   | DrugBank | DrugBank           |        |
| <i>Colla Corrii Asini (EJiao, EJ)</i>                | MOL000055 | Lysine        | Lysine-tRNA ligase                      | KARS     | DrugBank |                    |        |
| <i>Colla Corrii Asini (EJiao, EJ)</i>                | MOL000055 | Lysine        | H3 histone, family 3A                   | H3F3A    | STITCH   |                    |        |
| <i>Colla Corrii Asini (EJiao, EJ)</i>                | MOL000055 | Lysine        | H3 histone, family 3B                   | H3F3B    | STITCH   | STITCH             |        |
| <i>Colla Corrii Asini (EJiao, EJ)</i>                | MOL000055 | Lysine        | histone cluster 1, H4a                  | HIST1H4A | STITCH   |                    |        |
| <i>Colla Corrii Asini (EJiao, EJ)</i>                | MOL000055 | Lysine        | histone cluster 1, H4f                  | HIST1H4F | STITCH   |                    |        |
| <i>Colla Corrii Asini (EJiao, EJ)</i>                | MOL000055 | Lysine        | histone cluster 2, H4a                  | HIST2H4A | STITCH   |                    |        |
| <i>Colla Corrii Asini (EJiao, EJ)</i>                | MOL000055 | Lysine        | histone cluster 1, H4c                  | HIST1H4C | STITCH   | STITCH             |        |
| <i>Colla Corrii Asini (EJiao, EJ)</i>                | MOL000055 | Lysine        | histone cluster 1, H4b                  | HIST1H4B | STITCH   |                    |        |
| <i>Colla Corrii Asini (EJiao, EJ)</i>                | MOL000055 | Lysine        | histone cluster 2, H4b                  | HIST2H4B | STITCH   |                    |        |
| <i>Colla Corrii Asini (EJiao, EJ)</i>                | MOL000055 | Lysine        | histone cluster 1, H4e                  | HIST1H4E | STITCH   |                    |        |
| <i>Colla Corrii Asini (EJiao, EJ)</i>                | MOL000055 | Lysine        | histone cluster 4, H4                   | HIST4H4  | STITCH   | DrugBank           |        |
| <i>Colla Corrii Asini (EJiao, EJ)</i>                | MOL003971 | Threonine     | Threonine-tRNA ligase, cytoplasmic      | TARS     | DrugBank |                    |        |
| <i>Colla Corrii Asini (EJiao, EJ)</i>                | MOL003971 | Threonine     | Threonine-tRNA ligase, mitochondria     | TARS2    | DrugBank |                    |        |
| <i>Colla Corrii Asini (EJiao, EJ)</i>                | MOL003971 | Threonine     | neurotensin receptor 2                  | NTSR2    | STITCH   |                    |        |
| <i>Colla Corrii Asini (EJiao, EJ)</i>                | MOL003971 | Threonine     | neurotensin receptor 1 (high affinity   | NTSR1    | STITCH   | STITCH             |        |
| <i>Colla Corrii Asini (EJiao, EJ)</i>                | MOL003971 | Threonine     | taspase, threonine aspartase, 1         | TASP1    | STITCH   |                    |        |
| <i>Colla Corrii Asini (EJiao, EJ)</i>                | MOL003971 | Threonine     | protein phosphatase 1, catalytic subu   | PPP1CB   | STITCH   |                    |        |
| <i>Colla Corrii Asini (EJiao, EJ)</i>                | MOL003971 | Threonine     | Neurotensin                             | NTS      | STITCH   |                    |        |
