# Supplementary material for: Network Pharmacology Approach for Predicting Targets of Zishen Yutai Pills on Premature Ovarian Insufficiency
Source: Hindawi journal article supplement (doi:10.1155/2021/8215454), 2021-08-04
Supplement: f1 [file 8215454.f1.zip]

Supplementary Table S2P. Corresponding Targets of LJJ

| Herb Name                                     | Mol ID | Chemical Name     | Protein Name                               | Symbol  | Sources  |
|-----------------------------------------------|--------|-------------------|--------------------------------------------|---------|----------|
| <i>Colla Cornus Cervi (Lu Jiao Jiao, LJJ)</i> |        | Calcium Phosphate | alpha-2-HS-glycoprotein                    | AHSG    | STITCH   |
| <i>Colla Cornus Cervi (Lu Jiao Jiao, LJJ)</i> |        | Calcium Phosphate | carbonic anhydrase X;                      | CA10    | STITCH   |
| <i>Colla Cornus Cervi (Lu Jiao Jiao, LJJ)</i> |        | Calcium Phosphate | matrix metalloproteinase 20                | MMP20   | STITCH   |
| <i>Colla Cornus Cervi (Lu Jiao Jiao, LJJ)</i> |        | Calcium Phosphate | integrin-binding sialoprotein;             | IBSP    | STITCH   |
| <i>Colla Cornus Cervi (Lu Jiao Jiao, LJJ)</i> |        | Calcium Phosphate | secreted phosphoprotein 1                  | SSP1    | STITCH   |
| <i>Colla Cornus Cervi (Lu Jiao Jiao, LJJ)</i> |        | Calcium Phosphate | ameloblastin (enamel matrix protein)       | AMBN    | STITCH   |
| <i>Colla Cornus Cervi (Lu Jiao Jiao, LJJ)</i> |        | Calcium Phosphate | enamelin                                   | ENAM    | STITCH   |
| <i>Colla Cornus Cervi (Lu Jiao Jiao, LJJ)</i> |        | Calcium Phosphate | dentin sialophosphoprotein                 | DSPP    | STITCH   |
| <i>Colla Cornus Cervi (Lu Jiao Jiao, LJJ)</i> |        | Calcium Phosphate | matrix metalloproteinase 25;               | MMP25   | STITCH   |
| <i>Colla Cornus Cervi (Lu Jiao Jiao, LJJ)</i> |        | Calcium Phosphate | mitochondrially encoded cytochrome c ox    | MT-CO3  | STITCH   |
| <i>Colla Cornus Cervi (Lu Jiao Jiao, LJJ)</i> |        | Calcium Phosphate | Extracellular calcium-sensing receptor     | CASR    | DrugBank |
| <i>Colla Cornus Cervi (Lu Jiao Jiao, LJJ)</i> |        | Calcium Phosphate | Calreticulin                               | CALR    | DrugBank |
| <i>Colla Cornus Cervi (Lu Jiao Jiao, LJJ)</i> |        | Calcium Phosphate | Calcium and integrin-binding protein 1     | CIB1    | DrugBank |
| <i>Colla Cornus Cervi (Lu Jiao Jiao, LJJ)</i> |        | Calcium Phosphate | Programmed cell death protein 6            | PDCD6   | DrugBank |
| <i>Colla Cornus Cervi (Lu Jiao Jiao, LJJ)</i> |        | Calcium Phosphate | Sorcin                                     | SRI     | DrugBank |
| <i>Colla Cornus Cervi (Lu Jiao Jiao, LJJ)</i> |        | Calcium Phosphate | Calcineurin B homologous protein 1         | CHP1    | DrugBank |
| <i>Colla Cornus Cervi (Lu Jiao Jiao, LJJ)</i> |        | Calcium Phosphate | SPARC                                      | SPARC   | DrugBank |
| <i>Colla Cornus Cervi (Lu Jiao Jiao, LJJ)</i> |        | Calcium Phosphate | Calnexin                                   | CANX    | DrugBank |
| <i>Colla Cornus Cervi (Lu Jiao Jiao, LJJ)</i> |        | Calcium Phosphate | Fibrillin-2                                | FBN2    | DrugBank |
| <i>Colla Cornus Cervi (Lu Jiao Jiao, LJJ)</i> |        | Calcium Phosphate | Protein S100-B                             | S100B   | DrugBank |
| <i>Colla Cornus Cervi (Lu Jiao Jiao, LJJ)</i> |        | Calcium Phosphate | Calsequestrin-2                            | CASQ2   | DrugBank |
| <i>Colla Cornus Cervi (Lu Jiao Jiao, LJJ)</i> |        | Calcium Phosphate | Regucalcin                                 | RGN     | DrugBank |
| <i>Colla Cornus Cervi (Lu Jiao Jiao, LJJ)</i> |        | Calcium Phosphate | Peflin                                     | PEF1    | DrugBank |
| <i>Colla Cornus Cervi (Lu Jiao Jiao, LJJ)</i> |        | Calcium Phosphate | Protein S100-A6                            | S100A6  | DrugBank |
| <i>Colla Cornus Cervi (Lu Jiao Jiao, LJJ)</i> |        | Calcium Phosphate | Translationally-controlled tumor protein   | TPT1    | DrugBank |
| <i>Colla Cornus Cervi (Lu Jiao Jiao, LJJ)</i> |        | Calcium Phosphate | Calcium and integrin-binding family men    | CIB2    | DrugBank |
| <i>Colla Cornus Cervi (Lu Jiao Jiao, LJJ)</i> |        | Calcium Phosphate | Protein S100-A13                           | S100A13 | DrugBank |
| <i>Colla Cornus Cervi (Lu Jiao Jiao, LJJ)</i> |        | Calcium Phosphate | Calsequestrin-1                            | CASQ1   | DrugBank |
| <i>Colla Cornus Cervi (Lu Jiao Jiao, LJJ)</i> |        | Calcium Phosphate | Nucleobindin-1                             | NUCB1   | DrugBank |
| <i>Colla Cornus Cervi (Lu Jiao Jiao, LJJ)</i> |        | Calcium Phosphate | Nucleobindin-2                             | NUCB2   | DrugBank |
| <i>Colla Cornus Cervi (Lu Jiao Jiao, LJJ)</i> |        | Calcium Phosphate | Calmodulin                                 | CALM1   | DrugBank |
| <i>Colla Cornus Cervi (Lu Jiao Jiao, LJJ)</i> |        | Calcium Phosphate | Fibrillin-3                                | FBN3    | DrugBank |
| <i>Colla Cornus Cervi (Lu Jiao Jiao, LJJ)</i> |        | Calcium Phosphate | Grancalcin                                 | GCA     | DrugBank |
| <i>Colla Cornus Cervi (Lu Jiao Jiao, LJJ)</i> |        | Calcium Phosphate | Calcium-dependent secretion activator 1    | GADPS   | DrugBank |
| <i>Colla Cornus Cervi (Lu Jiao Jiao, LJJ)</i> |        | Calcium Phosphate | Calmodulin-2                               | CALM2   | DrugBank |
| <i>Colla Cornus Cervi (Lu Jiao Jiao, LJJ)</i> |        | Calcium Phosphate | Calmodulin-3                               | CALM3   | DrugBank |
| <i>Colla Cornus Cervi (Lu Jiao Jiao, LJJ)</i> |        | Calcium Phosphate | Protein S100-A16                           | S100A16 | DrugBank |
| <i>Colla Cornus Cervi (Lu Jiao Jiao, LJJ)</i> |        | Calcium Phosphate | Calretinin                                 | CALB2   | DrugBank |
| <i>Colla Cornus Cervi (Lu Jiao Jiao, LJJ)</i> |        | Calcium Phosphate | Calcyphosin                                | CAPS    | DrugBank |
| <i>Colla Cornus Cervi (Lu Jiao Jiao, LJJ)</i> |        | Calcium Phosphate | Calcium-dependent secretion activator 2    | CADPS2  | DrugBank |
| <i>Colla Cornus Cervi (Lu Jiao Jiao, LJJ)</i> |        | Calcium Phosphate | Calreticulin-3                             | CALR3   | DrugBank |
| <i>Colla Cornus Cervi (Lu Jiao Jiao, LJJ)</i> |        | Calcium Phosphate | Neurexin-1                                 | NRXN1   | DrugBank |
| <i>Colla Cornus Cervi (Lu Jiao Jiao, LJJ)</i> |        | Calcium Phosphate | Neuronal calcium sensor 1                  | NCS1    | DrugBank |
| <i>Colla Cornus Cervi (Lu Jiao Jiao, LJJ)</i> |        | Calcium Carbonate | solute carrier family 4, sodium bicarbonat | SLC4A4  | STITCH   |
| <i>Colla Cornus Cervi (Lu Jiao Jiao, LJJ)</i> |        | Calcium Carbonate | solute carrier family 4, sodium bicarbonat | SLC4A5  | STITCH   |
| <i>Colla Cornus Cervi (Lu Jiao Jiao, LJJ)</i> |        | Calcium Carbonate | solute carrier family 4, sodium bicarbonat | SLC4A9  | STITCH   |
