# Supplementary material for: Network Pharmacology Approach for Predicting Targets of Zishen Yutai Pills on Premature Ovarian Insufficiency
Source: Hindawi journal article supplement (doi:10.1155/2021/8215454), 2021-08-04
Supplement: f1 [file 8215454.f1.zip]

| Supplementary Table S2B. Corresponding Targets of GQZ |           |                  |                                                            |          |                         |                         |
|-------------------------------------------------------|-----------|------------------|------------------------------------------------------------|----------|-------------------------|-------------------------|
| Herb Name                                             | Mol ID    | Chemical Name    | Protein Name                                               | Symbol   | Source                  |                         |
| <i>Lycti Fructus</i> (Gou Q Z, GQZ)                   | MOL000358 | Beta-sitosterol  | DNA polymerase beta                                        | POOL8    | PubChem                 |                         |
| <i>Lycti Fructus</i> (Gou Q Z, GQZ)                   | MOL000358 | Beta-sitosterol  | glycogen synthase kinase 3 beta                            | GSK3B    | PubChem                 |                         |
| <i>Lycti Fructus</i> (Gou Q Z, GQZ)                   | MOL000358 | Beta-sitosterol  | protein kinase AMP-activated non-catalytic subunit         | PRKAB2   | PubChem                 |                         |
| <i>Lycti Fructus</i> (Gou Q Z, GQZ)                   | MOL000358 | Beta-sitosterol  | protein kinase AMP-activated non-catalytic subunit         | PRKAG3   | PubChem                 |                         |
| <i>Lycti Fructus</i> (Gou Q Z, GQZ)                   | MOL000358 | Beta-sitosterol  | protein kinase AMP-activated non-catalytic subunit         | PRKAG1   | PubChem                 |                         |
| <i>Lycti Fructus</i> (Gou Q Z, GQZ)                   | MOL000358 | Beta-sitosterol  | protein kinase AMP-activated catalytic subunit alpha       | PRKA1A   | PubChem                 |                         |
| <i>Lycti Fructus</i> (Gou Q Z, GQZ)                   | MOL000358 | Beta-sitosterol  | protein kinase AMP-activated catalytic subunit alpha       | PRKA2A   | PubChem                 |                         |
| <i>Lycti Fructus</i> (Gou Q Z, GQZ)                   | MOL000358 | Beta-sitosterol  | protein kinase AMP-activated non-catalytic subunit         | PRKA1B   | PubChem                 |                         |
| <i>Lycti Fructus</i> (Gou Q Z, GQZ)                   | MOL000358 | Beta-sitosterol  | protein kinase AMP-activated non-catalytic subunit         | PRKAG2   | PubChem                 |                         |
| <i>Lycti Fructus</i> (Gou Q Z, GQZ)                   | MOL000358 | Beta-sitosterol  | dipeptidyl peptidase 4                                     | DPP4     | PubChem                 |                         |
| <i>Lycti Fructus</i> (Gou Q Z, GQZ)                   | MOL000358 | Beta-sitosterol  | coagulation factor II, thrombin                            | F2       | PubChem                 |                         |
| <i>Lycti Fructus</i> (Gou Q Z, GQZ)                   | MOL000953 | CLR              | nuclear factor, erythroid 2 like 2                         | NFE2L2   | PubChem                 |                         |
| <i>Lycti Fructus</i> (Gou Q Z, GQZ)                   | MOL000953 | CLR              | ATP binding cassette subfamily 8 member 1                  | ABCC1    | PubChem                 |                         |
| <i>Lycti Fructus</i> (Gou Q Z, GQZ)                   | MOL000953 | CLR              | RAR related orphan receptor A                              | RORA     | PubChem                 |                         |
| <i>Lycti Fructus</i> (Gou Q Z, GQZ)                   | MOL000953 | CLR              | RAR related orphan receptor C                              | RORC     | PubChem                 |                         |
| <i>Lycti Fructus</i> (Gou Q Z, GQZ)                   | MOL003578 | Cycloartenol     | APC membrane recruitment protein 1                         | FAM123B  | STITCH                  |                         |
| <i>Lycti Fructus</i> (Gou Q Z, GQZ)                   | MOL003578 | Cycloartenol     | Lanosterol 14-alpha demethylase                            | CYP51A1  | STITCH                  |                         |
| <i>Lycti Fructus</i> (Gou Q Z, GQZ)                   | MOL001494 | Mandanol         | peroxisome proliferator activated receptor gamma           | PPARG    | PubChem                 |                         |
| <i>Lycti Fructus</i> (Gou Q Z, GQZ)                   | MOL001494 | Mandanol         | heat shock protein family B (small) member 1               | HSPB1    | PubChem                 |                         |
| <i>Lycti Fructus</i> (Gou Q Z, GQZ)                   | MOL001494 | Mandanol         | retinoic acid receptor alpha                               | RARA     | PubChem                 |                         |
| <i>Lycti Fructus</i> (Gou Q Z, GQZ)                   | MOL001494 | Mandanol         | G protein-coupled receptor 32                              | GPR32    | PubChem                 |                         |
| <i>Lycti Fructus</i> (Gou Q Z, GQZ)                   | MOL001494 | Mandanol         | nuclear receptor subfamily 1, group 1, member 2            | NR1I2    | PubChem                 |                         |
| <i>Lycti Fructus</i> (Gou Q Z, GQZ)                   | MOL001494 | Mandanol         | nuclear factor, erythroid 2 like 2                         | NFE2L2   | PubChem                 |                         |
| <i>Lycti Fructus</i> (Gou Q Z, GQZ)                   | MOL001494 | Mandanol         | peroxisome proliferator activated receptor delta           | PPARD    | PubChem                 |                         |
| <i>Lycti Fructus</i> (Gou Q Z, GQZ)                   | MOL001494 | Mandanol         | vitamin D receptor                                         | VDR      | PubChem                 |                         |
| <i>Lycti Fructus</i> (Gou Q Z, GQZ)                   | MOL001979 | LAN              | cytochrome P450 family 51 subfamily A member 1             | CYP51A1  | PubChem                 |                         |
| <i>Lycti Fructus</i> (Gou Q Z, GQZ)                   | MOL001979 | LAN              | crystallin alpha A                                         | CRYAA    | PubChem                 |                         |
| <i>Lycti Fructus</i> (Gou Q Z, GQZ)                   | MOL001979 | LAN              | crystallin beta B2                                         | CRYBB2   | PubChem                 |                         |
| <i>Lycti Fructus</i> (Gou Q Z, GQZ)                   | MOL001979 | LAN              | crystallin gamma C                                         | CRYGC    | PubChem                 |                         |
| <i>Lycti Fructus</i> (Gou Q Z, GQZ)                   | MOL001979 | LAN              | crystallin gamma D                                         | CRYGD    | PubChem                 |                         |
| <i>Lycti Fructus</i> (Gou Q Z, GQZ)                   | MOL001979 | LAN              | crystallin alpha B                                         | CRYAB    | PubChem                 |                         |
| <i>Lycti Fructus</i> (Gou Q Z, GQZ)                   | MOL001979 | LAN              | Lanosterol synthase                                        | LSS      | PubChem                 |                         |
| <i>Lycti Fructus</i> (Gou Q Z, GQZ)                   | MOL009650 | Atropine         | Muscarinic acetylcholine receptor M3                       | CHRM3    | STITCH                  | Swiss Target Prediction |
| <i>Lycti Fructus</i> (Gou Q Z, GQZ)                   | MOL009650 | Atropine         | Muscarinic acetylcholine receptor M1                       | CHRM1    | STITCH                  | Swiss Target Prediction |
| <i>Lycti Fructus</i> (Gou Q Z, GQZ)                   | MOL009650 | Atropine         | Muscarinic acetylcholine receptor M4                       | CHRM4    | STITCH                  | Swiss Target Prediction |
| <i>Lycti Fructus</i> (Gou Q Z, GQZ)                   | MOL009650 | Atropine         | Muscarinic acetylcholine receptor M5                       | CHRM5    | STITCH                  | Swiss Target Prediction |
| <i>Lycti Fructus</i> (Gou Q Z, GQZ)                   | MOL009650 | Atropine         | Muscarinic acetylcholine receptor M2                       | CHRM2    | STITCH                  | Swiss Target Prediction |
| <i>Lycti Fructus</i> (Gou Q Z, GQZ)                   | MOL009650 | Atropine         | Armaddillo repeat-containing protein 3                     | ARMC3    | STITCH                  |                         |
| <i>Lycti Fructus</i> (Gou Q Z, GQZ)                   | MOL009650 | Atropine         | Histamine H1 receptor                                      | HRH1     | STITCH                  |                         |
| <i>Lycti Fructus</i> (Gou Q Z, GQZ)                   | MOL009650 | Atropine         | Armaddillo repeat-containing X-linked protein 3            | ARMXC3   | STITCH                  |                         |
| <i>Lycti Fructus</i> (Gou Q Z, GQZ)                   | MOL009650 | Atropine         | Junction plakoglobin                                       | JUP      | STITCH                  |                         |
| <i>Lycti Fructus</i> (Gou Q Z, GQZ)                   | MOL009650 | Atropine         | Cholinesterase                                             | BCHE     | STITCH                  |                         |
| <i>Lycti Fructus</i> (Gou Q Z, GQZ)                   | MOL009650 | Atropine         | lysine acetyltransferase 2A                                | KAT2A    | PubChem                 |                         |
| <i>Lycti Fructus</i> (Gou Q Z, GQZ)                   | MOL009650 | Atropine         | Acetylcholinesterase (by homology)                         | ACHE     | Swiss Target Prediction |                         |
| <i>Lycti Fructus</i> (Gou Q Z, GQZ)                   | MOL009650 | Atropine         | Alpha-1D adrenergic receptor                               | ADORA1D  | Swiss Target Prediction |                         |
| <i>Lycti Fructus</i> (Gou Q Z, GQZ)                   | MOL009650 | Atropine         | Serotonin 2c (5-HT2c) receptor                             | HTR2C    | Swiss Target Prediction |                         |
| <i>Lycti Fructus</i> (Gou Q Z, GQZ)                   | MOL000449 | Stigmatanol      | DNA polymerase beta                                        | POOL8    | PubChem                 |                         |
| <i>Lycti Fructus</i> (Gou Q Z, GQZ)                   | MOL001495 | Ethyl linolenate | cytochrome P450 family 3 subfamily A member 4              | CYP3A4   | PubChem                 |                         |
| <i>Lycti Fructus</i> (Gou Q Z, GQZ)                   | MOL001495 | Ethyl linolenate | arachidonate 15-lipoxygenase                               | ALOX15   | PubChem                 |                         |
| <i>Lycti Fructus</i> (Gou Q Z, GQZ)                   | MOL001495 | Ethyl linolenate | aldehyde dehydrogenase 1 family member A1                  | ALDH1A1* | PubChem                 |                         |
| <i>Lycti Fructus</i> (Gou Q Z, GQZ)                   | MOL001495 | Ethyl linolenate | nuclear factor, erythroid 2 like 2                         | NFE2L2   | PubChem                 |                         |
| <i>Lycti Fructus</i> (Gou Q Z, GQZ)                   | MOL001495 | Ethyl linolenate | nuclear receptor subfamily 3 group C member 1              | NR3C1    | PubChem                 |                         |
| <i>Lycti Fructus</i> (Gou Q Z, GQZ)                   | MOL001495 | Ethyl linolenate | GLI family zinc finger 3                                   | GLI3     | PubChem                 |                         |
| <i>Lycti Fructus</i> (Gou Q Z, GQZ)                   | MOL001495 | Ethyl linolenate | estrogen receptor 2                                        | ESR2     | PubChem                 |                         |
| <i>Lycti Fructus</i> (Gou Q Z, GQZ)                   | MOL001495 | Ethyl linolenate | estrogen related receptor alpha                            | ESRRA    | PubChem                 |                         |
| <i>Lycti Fructus</i> (Gou Q Z, GQZ)                   | MOL000098 | Quercetin        | Induced myeloid leukemia cell differentiation protein M    | MCL1     | STITCH                  |                         |
| <i>Lycti Fructus</i> (Gou Q Z, GQZ)                   | MOL000098 | Quercetin        | Tyrosine-protein kinase HCK                                | HCK      | STITCH                  |                         |
| <i>Lycti Fructus</i> (Gou Q Z, GQZ)                   | MOL000098 | Quercetin        | Solute carrier family 2, facilitated glucose transporter m | SLC2A2   | STITCH                  |                         |
| <i>Lycti Fructus</i> (Gou Q Z, GQZ)                   | MOL000098 | Quercetin        | Cytochrome P450 22A                                        | CYP22B   | STITCH                  |                         |
| <i>Lycti Fructus</i> (Gou Q Z, GQZ)                   | MOL000098 | Quercetin        | ATP synthase subunit beta, mitochondrial                   | ATP5B    | STITCH                  |                         |
| <i>Lycti Fructus</i> (Gou Q Z, GQZ)                   | MOL000098 | Quercetin        | 3-hydroxyisobutyryl-CoA hydrolase, mitochondrial           | HIBCH    | STITCH                  |                         |
| <i>Lycti Fructus</i> (Gou Q Z, GQZ)                   | MOL000098 | Quercetin        | serine/threonine kinase 17b                                | STK17B   | STITCH                  |                         |
| <i>Lycti Fructus</i> (Gou Q Z, GQZ)                   | MOL000098 | Quercetin        | NADPH oxidase 4                                            | NOX4     | Swiss Target Prediction |                         |
| <i>Lycti Fructus</i> (Gou Q Z, GQZ)                   | MOL000098 | Quercetin        | Vasopressin V2 receptor                                    | AVPR2    | Swiss Target Prediction |                         |
| <i>Lycti Fructus</i> (Gou Q Z, GQZ)                   | MOL000098 | Quercetin        | Aldose reductase                                           | AKR1B1   | Swiss Target Prediction |                         |
| <i>Lycti Fructus</i> (Gou Q Z, GQZ)                   | MOL000098 | Quercetin        | Xanthine dehydrogenase                                     | XDH      | Swiss Target Prediction |                         |
| <i>Lycti Fructus</i> (Gou Q Z, GQZ)                   | MOL000098 | Quercetin        | Monooamine oxidase A                                       | MAOA     | Swiss Target Prediction |                         |
| <i>Lycti Fructus</i> (Gou Q Z, GQZ)                   | MOL000098 | Quercetin        | Insulin-like growth factor I receptor                      | IGF1R    | Swiss Target Prediction |                         |
| <i>Lycti Fructus</i> (Gou Q Z, GQZ)                   | MOL000098 | Quercetin        | Tyrosine-protein kinase receptor FLT3                      | FLT3     | Swiss Target Prediction |                         |
| <i>Lycti Fructus</i> (Gou Q Z, GQZ)                   | MOL000098 | Quercetin        | Cytochrome P450 19A1                                       | CYP19A1  | Swiss Target Prediction |                         |
| <i>Lycti Fructus</i> (Gou Q Z, GQZ)                   | MOL000098 | Quercetin        | Epidermal growth factor receptor erbB1                     | EGFR     | Swiss Target Prediction |                         |
| <i>Lycti Fructus</i> (Gou Q Z, GQZ)                   | MOL000098 | Quercetin        | Thrombin                                                   | F2       | Swiss Target Prediction |                         |
| <i>Lycti Fructus</i> (Gou Q Z, GQZ)                   | MOL000098 | Quercetin        | Carbonic anhydrase II                                      | CA2      | Swiss Target Prediction |                         |
| <i>Lycti Fructus</i> (Gou Q Z, GQZ)                   | MOL000098 | Quercetin        | Serine/threonine-protein kinase PIM1                       | PIM1     | Swiss Target Prediction | STITCH                  |
| <i>Lycti Fructus</i> (Gou Q Z, GQZ)                   | MOL000098 | Quercetin        | Arachidonate 5-lipoxygenase                                | ALOX5    | Swiss Target Prediction |                         |
| <i>Lycti Fructus</i> (Gou Q Z, GQZ)                   | MOL000098 | Quercetin        | Serine/threonine-protein kinase Aurora-B                   | AURKB    | Swiss Target Prediction |                         |
| <i>Lycti Fructus</i> (Gou Q Z, GQZ)                   | MOL000098 | Quercetin        | Dopamine D4 receptor                                       | DRD4     | Swiss Target Prediction |                         |
| <i>Lycti Fructus</i> (Gou Q Z, GQZ)                   | MOL000098 | Quercetin        | Adenosine A1 receptor (by homology)                        | ADORA1   | Swiss Target Prediction |                         |
| <i>Lycti Fructus</i> (Gou Q Z, GQZ)                   | MOL000098 | Quercetin        | Carbonic anhydrase VII                                     | CA7      | Swiss Target Prediction |                         |
| <i>Lycti Fructus</i> (Gou Q Z, GQZ)                   | MOL000098 | Quercetin        | Glyoxalase I                                               | GLO1     | Swiss Target Prediction |                         |
| <i>Lycti Fructus</i> (Gou Q Z, GQZ)                   | MOL000098 | Quercetin        | Myeloperoxidase                                            | MPO      | Swiss Target Prediction |                         |
| <i>Lycti Fructus</i> (Gou Q Z, GQZ)                   | MOL000098 | Quercetin        | PI3-kinase p85-alpha subunit                               | PIK3R1   | Swiss Target Prediction |                         |
| <i>Lycti Fructus</i> (Gou Q Z, GQZ)                   | MOL000098 | Quercetin        | Adenosine A2A receptor (by homology)                       | ADORA2A  | Swiss Target Prediction |                         |
| <i>Lycti Fructus</i> (Gou Q Z, GQZ)                   | MOL000098 | Quercetin        | Death-associated protein kinase 1                          | DAPK1    | Swiss Target Prediction |                         |
| <i>Lycti Fructus</i> (Gou Q Z, GQZ)                   | MOL000098 | Quercetin        | Liver glycogen phosphorylase                               | PHGL     | Swiss Target Prediction |                         |
| <i>Lycti Fructus</i> (Gou Q Z, GQZ)                   | MOL000098 | Quercetin        | Carbonic anhydrase I                                       | CA1      | Swiss Target Prediction |                         |
| <i>Lycti Fructus</i> (Gou Q Z, GQZ)                   | MOL000098 | Quercetin        | Glycogen synthase kinase-3 beta                            | GSK3B    | Swiss Target Prediction |                         |
| <i>Lycti Fructus</i> (Gou Q Z, GQZ)                   | MOL000098 | Quercetin        | Tyrosine-protein kinase SRC                                | SRC      | Swiss Target Prediction |                         |
| <i>Lycti Fructus</i> (Gou Q Z, GQZ)                   | MOL000098 | Quercetin        | Focal adhesion kinase 1                                    | PTK2     | Swiss Target Prediction |                         |
| <i>Lycti Fructus</i> (Gou Q Z, GQZ)                   | MOL000098 | Quercetin        | Estradiol 17-beta-dehydrogenase 2                          | HSD17B2  | Swiss Target Prediction |                         |
| <i>Lycti Fructus</i> (Gou Q Z, GQZ)                   | MOL000098 | Quercetin        | Vascular endothelial growth factor receptor 2              | KDR      | Swiss Target Prediction |                         |
| <i>Lycti Fructus</i> (Gou Q Z, GQZ)                   | MOL000098 | Quercetin        | Matrix metalloproteinase 13                                | MMP13    | Swiss Target Prediction |                         |
| <i>Lycti Fructus</i> (Gou Q Z, GQZ)                   | MOL000098 | Quercetin        | Matrix metalloproteinase 3                                 | MMP3     | Swiss Target Prediction |                         |
| <i>Lycti Fructus</i> (Gou Q Z, GQZ)                   | MOL000098 | Quercetin        | Carbonic anhydrase III                                     | CA3      | Swiss Target Prediction |                         |
| <i>Lycti Fructus</i> (Gou Q Z, GQZ)                   | MOL000098 | Quercetin        | Arachidonate 15-lipoxygenase                               | ALOX15   | Swiss Target Prediction |                         |
| <i>Lycti Fructus</i> (Gou Q Z, GQZ)                   | MOL000098 | Quercetin        | Multidrug resistance-associated protein 1                  | ABCC1    | Swiss Target Prediction |                         |
| <i>Lycti Fructus</i> (Gou Q Z, GQZ)                   | MOL000098 | Quercetin        | Serine/threonine-protein kinase PLK1                       | PLK1     | Swiss Target Prediction |                         |
| <i>Lycti Fructus</i> (Gou Q Z, GQZ)                   | MOL000098 | Quercetin        | Carbonic anhydrase VI                                      | CA6      | Swiss Target Prediction |                         |
| <i>Lycti Fructus</i> (Gou Q Z, GQZ)                   | MOL000098 | Quercetin        | Cyclin-dependent kinase 1                                  | CDK1     | Swiss Target Prediction |                         |
| <i>Lycti Fructus</i> (Gou Q Z, GQZ)                   | MOL000098 | Quercetin        | Matrix metalloproteinase 9                                 | MMP9     | Swiss Target Prediction |                         |
| <i>Lycti Fructus</i> (Gou Q Z, GQZ)                   | MOL000098 | Quercetin        | Carbonic anhydrase XII                                     | CA12     | Swiss Target Prediction |                         |
| <i>Lycti Fructus</i> (Gou Q Z, GQZ)                   | MOL000098 | Quercetin        | Matrix metalloproteinase 2                                 | MMP2     | Swiss Target Prediction |                         |
| <i>Lycti Fructus</i> (Gou Q Z, GQZ)                   | MOL000098 | Quercetin        | Protein kinase N1                                          | PKN1     | Swiss Target Prediction |                         |
| <i>Lycti Fructus</i> (Gou Q Z, GQZ)                   | MOL000098 | Quercetin        | Carbonic anhydrase XIV                                     | CA14     | Swiss Target Prediction |                         |
| <i>Lycti Fructus</i> (Gou Q Z, GQZ)                   | MOL000098 | Quercetin        | Carbonic anhydrase IX                                      | CA9      | Swiss Target Prediction |                         |
| <i>Lycti Fructus</i> (Gou Q Z, GQZ)                   | MOL000098 | Quercetin        | Casein kinase II alpha                                     | CSNK2A1  | Swiss Target Prediction |                         |
| <i>Lycti Fructus</i> (Gou Q Z, GQZ)                   | MOL000098 | Quercetin        | Arachidonate 12-lipoxygenase                               | ALOX12   | Swiss Target Prediction |                         |
| <i>Lycti Fructus</i> (Gou Q Z, GQZ)                   | MOL000098 | Quercetin        | Hepatocyte growth factor receptor                          | MET      | Swiss Target Prediction |                         |
| <i>Lycti Fructus</i> (Gou Q Z, GQZ)                   | MOL000098 | Quercetin        | Carbonic anhydrase IV                                      | CA4      | Swiss Target Prediction |                         |
| <i>Lycti Fructus</i> (Gou Q Z, GQZ)                   | MOL000098 | Quercetin        | Serine/threonine-protein kinase NEK2                       | NEK2     | Swiss Target Prediction |                         |
| <i>Lycti Fructus</i> (Gou Q Z, GQZ)                   | MOL000098 | Quercetin        | Interleukin-8 receptor A                                   | CXCR1    | Swiss Target Prediction |                         |
| <i>Lycti Fructus</i> (Gou Q Z, GQZ)                   | MOL000098 | Quercetin        | CAM kinase II beta                                         | CAMK2B   | Swiss Target Prediction |                         |
| <i>Lycti Fructus</i> (Gou Q Z, GQZ)                   | MOL000098 | Quercetin        | ALK tyrosine kinase receptor                               | ALK      | Swiss Target Prediction |                         |
| <i>Lycti Fructus</i> (Gou Q Z, GQZ)                   | MOL000098 | Quercetin        | Serine/threonine-protein kinase AKT                        | AKT1     | Swiss Target Prediction |                         |
| <i>Lycti Fructus</i> (Gou Q Z, GQZ)                   | MOL000098 | Quercetin        | P-glycoprotein 1                                           | ABCB1    | Swiss Target Prediction |                         |
| <i>Lycti Fructus</i> (Gou Q Z, GQZ)                   | MOL000098 | Quercetin        | Serine/threonine-protein kinase NEK6                       | NEK6     | Swiss Target Prediction |                         |
| <i>Lycti Fructus</i> (Gou Q Z, GQZ)                   | MOL000098 | Quercetin        | Phospholipase A2 group 1B                                  | PLA2G1B  | Swiss Target Prediction |                         |
| <i>Lycti Fructus</i> (Gou Q Z, GQZ)                   | MOL000098 | Quercetin        | Carbonic anhydrase VA                                      | CA5A     | Swiss Target Prediction |                         |
| <i>Lycti Fructus</i> (Gou Q Z, GQZ)                   | MOL000098 | Quercetin        | Beta-secretase 1                                           | BACE1    | Swiss Target Prediction |                         |
| <i>Lycti Fructus</i> (Gou Q Z, GQZ)                   | MOL000098 | Quercetin        | Cytochrome P450 11B1                                       | CYP11B1  | Swiss Target Prediction | STITCH                  |
| <i>Lycti Fructus</i> (Gou Q Z, GQZ)                   | MOL000098 | Quercetin        | Tyrosine-protein kinase receptor UFO                       | AXL      | Swiss Target Prediction |                         |
| <i>Lycti Fructus</i> (Gou Q Z, GQZ)                   | MOL000098 | Quercetin        | ATP-binding cassette sub-family G member 2                 | ABCG2    | Swiss Target Prediction |                         |
| <i>Lycti Fructus</i> (Gou Q Z, GQZ)                   | MOL000098 | Quercetin        | NUAK family SNF1-like kinase 1                             | NUAK1    | Swiss Target Prediction |                         |
| <i>Lycti Fructus</i> (Gou Q Z, GQZ)                   | MOL000098 | Quercetin        | Aldo-keto reductase family 1 member C2 (by homology)       | AKR1C2   | Swiss Target Prediction |                         |
| <i>Lycti Fructus</i> (Gou Q Z, GQZ)                   | MOL000098 | Quercetin        | Aldo-keto reductase family 1 member C1 (by homology)       | AKR1C1   | Swiss Target Prediction |                         |
| <i>Lycti Fructus</i> (Gou Q Z, GQZ)                   | MOL000098 | Quercetin        | Aldo-keto reductase family 1 member C3 (by homology)       | AKR1C3   | Swiss Target Prediction |                         |
| <i>Lycti Fructus</i> (Gou Q Z, GQZ)                   | MOL000098 | Quercetin        | Aldo-keto reductase family 1 member C4 (by homology)       | AKR1C4   | Swiss Target Prediction |                         |
| <i>Lycti Fructus</i> (Gou Q Z, GQZ)                   | MOL000098 | Quercetin        | Carbonic anhydrase XIII (by homology)                      | CA13     | Swiss Target Prediction |                         |
| <i>Lycti Fructus</i> (Gou Q Z, GQZ)                   | MOL000098 | Quercetin        | Aldehyde reductase (by homology)                           | AKR1A1   | Swiss Target Prediction |                         |
| <i>Lycti Fructus</i> (Gou Q Z, GQZ)                   | MOL000098 | Quercetin        | G-protein coupled receptor 35                              | GPR35    | Swiss Target Prediction |                         |
| <i>Lycti Fructus</i> (Gou Q Z, GQZ)                   | MOL000098 | Quercetin        | Tyrosine-protein kinase SYK                                | SYK      | Swiss Target Prediction |                         |
| <i>Lycti Fructus</i> (Gou Q Z, GQZ)                   | MOL000400 | Glycine          | Transcription factor AP-1                                  | JUN      | STITCH                  |                         |
| <i>Lycti Fructus</i> (Gou Q Z, GQZ)                   | MOL000400 | Glycine          | Mitogen-activated protein kinase 3                         | MAPK3    | STITCH                  |                         |
| <i>Lycti Fructus</i> (Gou Q Z, GQZ)                   | MOL000400 | Glycine          | Transcription factor Sp1                                   | SP1      | STITCH                  |                         |
| <i>Lycti Fructus</i> (Gou Q Z, GQZ)                   | MOL000400 | Glycine          | Collagenase 3                                              | MMP13    | STITCH                  |                         |
| <i>Lycti Fructus</i> (Gou Q Z, GQZ)                   | MOL000400 | Glycine          | Mitogen-activated protein kinase 1                         | MAPK1    | STITCH                  |                         |
| <i>Lycti Fructus</i> (Gou Q Z, GQZ)                   | MOL000400 | Glycine          | Cyclin-dependent kinase 4                                  | CDK4     | STITCH                  |                         |
| <i>Lycti Fructus</i> (Gou Q Z, GQZ)                   | MOL000400 | Glycine          | Estrogen Receptor 1                                        | ESR1     | PubChem                 |                         |
