# Supplementary material for: Network Pharmacology Approach for Predicting Targets of Zishen Yutai Pills on Premature Ovarian Insufficiency
Source: Hindawi journal article supplement (doi:10.1155/2021/8215454), 2021-08-04
Supplement: f1 [file 8215454.f1.zip]

| Supplementary Table S2L.. Corresponding Targets of AY |           |                        |                                                          |         |                         |
|-------------------------------------------------------|-----------|------------------------|----------------------------------------------------------|---------|-------------------------|
| Herb Name                                             | Mol ID    | Chemical Name          | Protein Name                                             | Symbol  | Sources                 |
| <i>Folium Artemisiae Argi</i> (Ai Ye, AY)             | MOL000358 | Beta-sitosterol        | DNA polymerase beta                                      | POLB    | PubChem                 |
| <i>Folium Artemisiae Argi</i> (Ai Ye, AY)             | MOL000358 | Beta-sitosterol        | glycogen synthase kinase 3 beta                          | GSK3B   | PubChem                 |
| <i>Folium Artemisiae Argi</i> (Ai Ye, AY)             | MOL000358 | Beta-sitosterol        | protein kinase AMP-activated non-catalytic               | PRKAB2  | PubChem                 |
| <i>Folium Artemisiae Argi</i> (Ai Ye, AY)             | MOL000358 | Beta-sitosterol        | protein kinase AMP-activated non-catalytic               | PRKAG3  | PubChem                 |
| <i>Folium Artemisiae Argi</i> (Ai Ye, AY)             | MOL000358 | Beta-sitosterol        | protein kinase AMP-activated non-catalytic               | PRKAG1  | PubChem                 |
| <i>Folium Artemisiae Argi</i> (Ai Ye, AY)             | MOL000358 | Beta-sitosterol        | protein kinase AMP-activated catalytic subunit           | PRKAA1  | PubChem                 |
| <i>Folium Artemisiae Argi</i> (Ai Ye, AY)             | MOL000358 | Beta-sitosterol        | protein kinase AMP-activated catalytic subunit           | PRKAA2  | PubChem                 |
| <i>Folium Artemisiae Argi</i> (Ai Ye, AY)             | MOL000358 | Beta-sitosterol        | protein kinase AMP-activated non-catalytic               | PRKAB1  | PubChem                 |
| <i>Folium Artemisiae Argi</i> (Ai Ye, AY)             | MOL000358 | Beta-sitosterol        | protein kinase AMP-activated non-catalytic               | PRKAG2  | PubChem                 |
| <i>Folium Artemisiae Argi</i> (Ai Ye, AY)             | MOL000358 | Beta-sitosterol        | dipeptidyl peptidase 4                                   | DPPIV   | PubChem                 |
| <i>Folium Artemisiae Argi</i> (Ai Ye, AY)             | MOL000358 | Beta-sitosterol        | coagulation factor II, thrombin                          | F2      | PubChem                 |
| <i>Folium Artemisiae Argi</i> (Ai Ye, AY)             | MOL001494 | Mandenol               | peroxisome proliferator activated receptor               | PPARG   | PubChem                 |
| <i>Folium Artemisiae Argi</i> (Ai Ye, AY)             | MOL001494 | Mandenol               | heat shock protein family B (small) member               | HSPB1   | PubChem                 |
| <i>Folium Artemisiae Argi</i> (Ai Ye, AY)             | MOL001494 | Mandenol               | retinoic acid receptor alpha                             | RARA    | PubChem                 |
| <i>Folium Artemisiae Argi</i> (Ai Ye, AY)             | MOL001494 | Mandenol               | G protein-coupled receptor 32                            | GPCR32  | PubChem                 |
| <i>Folium Artemisiae Argi</i> (Ai Ye, AY)             | MOL001494 | Mandenol               | nuclear receptor subfamily 1, group 1, member            | NR1H2   | PubChem                 |
| <i>Folium Artemisiae Argi</i> (Ai Ye, AY)             | MOL001494 | Mandenol               | nuclear factor, erythroid 2 like 2                       | NFE2L2  | PubChem                 |
| <i>Folium Artemisiae Argi</i> (Ai Ye, AY)             | MOL001494 | Mandenol               | peroxisome proliferator activated receptor               | PPARG   | PubChem                 |
| <i>Folium Artemisiae Argi</i> (Ai Ye, AY)             | MOL001494 | Mandenol               | vitamin D receptor                                       | VDR     | PubChem                 |
| <i>Folium Artemisiae Argi</i> (Ai Ye, AY)             | MOL001040 | xy-2-(4-hydroxyphenyl) | peroxisome proliferator-activated receptor               | PPARA   | STITCH                  |
| <i>Folium Artemisiae Argi</i> (Ai Ye, AY)             | MOL001040 | xy-2-(4-hydroxyphenyl) | ATP-binding cassette, sub-family B (MDR)                 | ABCB1   | STITCH                  |
| <i>Folium Artemisiae Argi</i> (Ai Ye, AY)             | MOL001040 | xy-2-(4-hydroxyphenyl) | cytochrome P450, family 1, subfamily 1                   | CYP1A2  | STITCH                  |
| <i>Folium Artemisiae Argi</i> (Ai Ye, AY)             | MOL001040 | xy-2-(4-hydroxyphenyl) | apolipoprotein B (including Ag(a)) antigen               | APOB    | STITCH                  |
| <i>Folium Artemisiae Argi</i> (Ai Ye, AY)             | MOL001040 | xy-2-(4-hydroxyphenyl) | chemokine (C-C motif) ligand 2                           | CCl2    | STITCH                  |
| <i>Folium Artemisiae Argi</i> (Ai Ye, AY)             | MOL001040 | xy-2-(4-hydroxyphenyl) | heme oxygenase (decycling) 1                             | HMOX1   | STITCH                  |
| <i>Folium Artemisiae Argi</i> (Ai Ye, AY)             | MOL001040 | xy-2-(4-hydroxyphenyl) | low density lipoprotein receptor (860 a)                 | LDLR    | STITCH                  |
| <i>Folium Artemisiae Argi</i> (Ai Ye, AY)             | MOL001040 | xy-2-(4-hydroxyphenyl) | brain-derived neurotrophic factor (329)                  | BDNF    | STITCH                  |
| <i>Folium Artemisiae Argi</i> (Ai Ye, AY)             | MOL001040 | xy-2-(4-hydroxyphenyl) | Rap guanine nucleotide exchange factor                   | RAPGEF1 | STITCH                  |
| <i>Folium Artemisiae Argi</i> (Ai Ye, AY)             | MOL001040 | xy-2-(4-hydroxyphenyl) | stearoyl-CoA desaturase (delta-9 desaturase)             | SCD     | STITCH                  |
| <i>Folium Artemisiae Argi</i> (Ai Ye, AY)             | MOL001040 | xy-2-(4-hydroxyphenyl) | Cytochrome P450 19A1                                     | CYP19A1 | Swiss Target Prediction |
| <i>Folium Artemisiae Argi</i> (Ai Ye, AY)             | MOL001040 | xy-2-(4-hydroxyphenyl) | Carbonic anhydrase VII                                   | CA7     | Swiss Target Prediction |
| <i>Folium Artemisiae Argi</i> (Ai Ye, AY)             | MOL001040 | xy-2-(4-hydroxyphenyl) | Multi-drug resistance-associated protein                 | ABCC1   | Swiss Target Prediction |
| <i>Folium Artemisiae Argi</i> (Ai Ye, AY)             | MOL001040 | xy-2-(4-hydroxyphenyl) | Estradiol 17-beta-dehydrogenase 1                        | HSD17B1 | Swiss Target Prediction |
| <i>Folium Artemisiae Argi</i> (Ai Ye, AY)             | MOL001040 | xy-2-(4-hydroxyphenyl) | Carbonic anhydrase XII                                   | CA12    | Swiss Target Prediction |
| <i>Folium Artemisiae Argi</i> (Ai Ye, AY)             | MOL001040 | xy-2-(4-hydroxyphenyl) | Testis-specific androgen-binding protein                 | SHBG    | Swiss Target Prediction |
| <i>Folium Artemisiae Argi</i> (Ai Ye, AY)             | MOL001040 | xy-2-(4-hydroxyphenyl) | Carbonic anhydrase IV                                    | CA4     | Swiss Target Prediction |
| <i>Folium Artemisiae Argi</i> (Ai Ye, AY)             | MOL001040 | xy-2-(4-hydroxyphenyl) | Cytochrome P450 1B1                                      | CYP1B1  | Swiss Target Prediction |
| <i>Folium Artemisiae Argi</i> (Ai Ye, AY)             | MOL001040 | xy-2-(4-hydroxyphenyl) | Carbonyl reductase [NADPH] 1                             | CBR1    | Swiss Target Prediction |
| <i>Folium Artemisiae Argi</i> (Ai Ye, AY)             | MOL000449 | Stigmasterol           | DNA polymerase beta                                      | POLB    | PubChem                 |
| <i>Folium Artemisiae Argi</i> (Ai Ye, AY)             | MOL000098 | Quercetin              | Induced myeloid leukemia cell differentiation            | MCL1    | STITCH                  |
| <i>Folium Artemisiae Argi</i> (Ai Ye, AY)             | MOL000098 | Quercetin              | Tyrosine-protein kinase HCK                              | HCK     | STITCH                  |
| <i>Folium Artemisiae Argi</i> (Ai Ye, AY)             | MOL000098 | Quercetin              | Solute carrier family 2, facilitated glucose transporter | SLC2A2  | STITCH                  |
| <i>Folium Artemisiae Argi</i> (Ai Ye, AY)             | MOL000098 | Quercetin              | Cytochrome P450 2C8                                      | CYP2C8  | STITCH                  |
| <i>Folium Artemisiae Argi</i> (Ai Ye, AY)             | MOL000098 | Quercetin              | ATP synthase subunit Beta, mitochondrial                 | ATP5B   | STITCH                  |
| <i>Folium Artemisiae Argi</i> (Ai Ye, AY)             | MOL000098 | Quercetin              | 3-hydroxyisobutyryl-CoA hydrolase, mitochondrial         | HIBCH   | STITCH                  |
| <i>Folium Artemisiae Argi</i> (Ai Ye, AY)             | MOL000098 | Quercetin              | serine/threonine kinase 17b                              | STK17B  | STITCH                  |
| <i>Folium Artemisiae Argi</i> (Ai Ye, AY)             | MOL000098 | Quercetin              | NADPH oxidase 4                                          | NOX4    | Swiss Target Prediction |
| <i>Folium Artemisiae Argi</i> (Ai Ye, AY)             | MOL000098 | Quercetin              | Vasopressin V2 receptor                                  | AVPR2   | Swiss Target Prediction |
| <i>Folium Artemisiae Argi</i> (Ai Ye, AY)             | MOL000098 | Quercetin              | Aldose reductase                                         | AKR1B1  | Swiss Target Prediction |
| <i>Folium Artemisiae Argi</i> (Ai Ye, AY)             | MOL000098 | Quercetin              | Xanthine dehydrogenase                                   | XDH     | Swiss Target Prediction |
| <i>Folium Artemisiae Argi</i> (Ai Ye, AY)             | MOL000098 | Quercetin              | Monoamine oxidase A                                      | MAOA    | Swiss Target Prediction |
| <i>Folium Artemisiae Argi</i> (Ai Ye, AY)             | MOL000098 | Quercetin              | Insulin-like growth factor 1 receptor                    | IGF1R   | Swiss Target Prediction |
| <i>Folium Artemisiae Argi</i> (Ai Ye, AY)             | MOL000098 | Quercetin              | Tyrosine-protein kinase receptor FLT3                    | FLT3    | Swiss Target Prediction |
| <i>Folium Artemisiae Argi</i> (Ai Ye, AY)             | MOL000098 | Quercetin              | Cytochrome P450 19A1                                     | CYP19A1 | Swiss Target Prediction |
| <i>Folium Artemisiae Argi</i> (Ai Ye, AY)             | MOL000098 | Quercetin              | Epidermal growth factor receptor erbB1                   | EGFR    | Swiss Target Prediction |
| <i>Folium Artemisiae Argi</i> (Ai Ye, AY)             | MOL000098 | Quercetin              | Thrombin                                                 | F2      | Swiss Target Prediction |
| <i>Folium Artemisiae Argi</i> (Ai Ye, AY)             | MOL000098 | Quercetin              | Carbonic anhydrase II                                    | CA2     | Swiss Target Prediction |
| <i>Folium Artemisiae Argi</i> (Ai Ye, AY)             | MOL000098 | Quercetin              | Serine/threonine-protein kinase PIM1                     | PIM1    | Swiss Target Prediction |
| <i>Folium Artemisiae Argi</i> (Ai Ye, AY)             | MOL000098 | Quercetin              | Arachidonate 5-lipoxygenase                              | ALOX5   | Swiss Target Prediction |
| <i>Folium Artemisiae Argi</i> (Ai Ye, AY)             | MOL000098 | Quercetin              | Serine/threonine-protein kinase Aurora-B                 | AURKB   | Swiss Target Prediction |
| <i>Folium Artemisiae Argi</i> (Ai Ye, AY)             | MOL000098 | Quercetin              | Dopamine D4 receptor                                     | DRD4    | Swiss Target Prediction |
| <i>Folium Artemisiae Argi</i> (Ai Ye, AY)             | MOL000098 | Quercetin              | Adenosine A1 receptor (by homology)                      | ADORA1  | Swiss Target Prediction |
| <i>Folium Artemisiae Argi</i> (Ai Ye, AY)             | MOL000098 | Quercetin              | Carbonic anhydrase VII                                   | CA7     | Swiss Target Prediction |
| <i>Folium Artemisiae Argi</i> (Ai Ye, AY)             | MOL000098 | Quercetin              | Glyoxalase I                                             | GLO1    | Swiss Target Prediction |
| <i>Folium Artemisiae Argi</i> (Ai Ye, AY)             | MOL000098 | Quercetin              | Myeloperoxidase                                          | MPO     | Swiss Target Prediction |
| <i>Folium Artemisiae Argi</i> (Ai Ye, AY)             | MOL000098 | Quercetin              | P13-kinase p85-alpha subunit                             | PIK3R1  | Swiss Target Prediction |
| <i>Folium Artemisiae Argi</i> (Ai Ye, AY)             | MOL000098 | Quercetin              | Adenosine A2a receptor (by homology)                     | ADORA2A | Swiss Target Prediction |
| <i>Folium Artemisiae Argi</i> (Ai Ye, AY)             | MOL000098 | Quercetin              | Death-associated protein kinase 1                        | DAPK1   | Swiss Target Prediction |
| <i>Folium Artemisiae Argi</i> (Ai Ye, AY)             | MOL000098 | Quercetin              | Liver glycogen phosphorylase                             | PYGL    | Swiss Target Prediction |
| <i>Folium Artemisiae Argi</i> (Ai Ye, AY)             | MOL000098 | Quercetin              | Carbonic anhydrase I                                     | CA1     | Swiss Target Prediction |
| <i>Folium Artemisiae Argi</i> (Ai Ye, AY)             | MOL000098 | Quercetin              | Glycogen synthase kinase-3 beta                          | GSK3B   | Swiss Target Prediction |
| <i>Folium Artemisiae Argi</i> (Ai Ye, AY)             | MOL000098 | Quercetin              | Tyrosine-protein kinase SRC                              | SRC     | Swiss Target Prediction |
| <i>Folium Artemisiae Argi</i> (Ai Ye, AY)             | MOL000098 | Quercetin              | Focal adhesion kinase 1                                  | PTK2    | Swiss Target Prediction |
| <i>Folium Artemisiae Argi</i> (Ai Ye, AY)             | MOL000098 | Quercetin              | Estradiol 17-Beta-dehydrogenase 2                        | HSD17B2 | Swiss Target Prediction |
| <i>Folium Artemisiae Argi</i> (Ai Ye, AY)             | MOL000098 | Quercetin              | Vascular endothelial growth factor receptor 2            | KDR     | Swiss Target Prediction |
| <i>Folium Artemisiae Argi</i> (Ai Ye, AY)             | MOL000098 | Quercetin              | Matrix metalloproteinase 13                              | MMP13   | Swiss Target Prediction |
| <i>Folium Artemisiae Argi</i> (Ai Ye, AY)             | MOL000098 | Quercetin              | Matrix metalloproteinase 3                               | MMP3    | Swiss Target Prediction |
| <i>Folium Artemisiae Argi</i> (Ai Ye, AY)             | MOL000098 | Quercetin              | Carbonic anhydrase III                                   | CA3     | Swiss Target Prediction |
| <i>Folium Artemisiae Argi</i> (Ai Ye, AY)             | MOL000098 | Quercetin              | Arachidonate 15-lipoxygenase                             | ALOX15  | Swiss Target Prediction |
| <i>Folium Artemisiae Argi</i> (Ai Ye, AY)             | MOL000098 | Quercetin              | Multi-drug resistance-associated protein 1               | ABCC1   | Swiss Target Prediction |
| <i>Folium Artemisiae Argi</i> (Ai Ye, AY)             | MOL000098 | Quercetin              | Serine/threonine-protein kinase PLK1                     | PLK1    | Swiss Target Prediction |
| <i>Folium Artemisiae Argi</i> (Ai Ye, AY)             | MOL000098 | Quercetin              | Carbonic anhydrase VI                                    | CA6     | Swiss Target Prediction |
| <i>Folium Artemisiae Argi</i> (Ai Ye, AY)             | MOL000098 | Quercetin              | Cyclin-dependent kinase 1                                | CDK1    | Swiss Target Prediction |
| <i>Folium Artemisiae Argi</i> (Ai Ye, AY)             | MOL000098 | Quercetin              | Matrix metalloproteinase 9                               | MMP9    | Swiss Target Prediction |
| <i>Folium Artemisiae Argi</i> (Ai Ye, AY)             | MOL000098 | Quercetin              | Carbonic anhydrase XII                                   | CA12    | Swiss Target Prediction |
| <i>Folium Artemisiae Argi</i> (Ai Ye, AY)             | MOL000098 | Quercetin              | Matrix metalloproteinase 2                               | MMP2    | Swiss Target Prediction |
| <i>Folium Artemisiae Argi</i> (Ai Ye, AY)             | MOL000098 | Quercetin              | Protein kinase N1                                        | PKN1    | Swiss Target Prediction |
| <i>Folium Artemisiae Argi</i> (Ai Ye, AY)             | MOL000098 | Quercetin              | Carbonic anhydrase XIV                                   | CA14    | Swiss Target Prediction |
| <i>Folium Artemisiae Argi</i> (Ai Ye, AY)             | MOL000098 | Quercetin              | Carbonic anhydrase IX                                    | CA9     | Swiss Target Prediction |
| <i>Folium Artemisiae Argi</i> (Ai Ye, AY)             | MOL000098 | Quercetin              | Casein kinase II alpha                                   | CSNK2A1 | Swiss Target Prediction |
| <i>Folium Artemisiae Argi</i> (Ai Ye, AY)             | MOL000098 | Quercetin              | Arachidonate 12-lipoxygenase                             | ALOX12  | Swiss Target Prediction |
| <i>Folium Artemisiae Argi</i> (Ai Ye, AY)             | MOL000098 | Quercetin              | Hepatocyte growth factor receptor                        | MET     | Swiss Target Prediction |
| <i>Folium Artemisiae Argi</i> (Ai Ye, AY)             | MOL000098 | Quercetin              | Carbonic anhydrase IV                                    | CA4     | Swiss Target Prediction |
| <i>Folium Artemisiae Argi</i> (Ai Ye, AY)             | MOL000098 | Quercetin              | Serine/threonine-protein kinase NEK2                     | NEK2    | Swiss Target Prediction |
| <i>Folium Artemisiae Argi</i> (Ai Ye, AY)             | MOL000098 | Quercetin              | Interleukin-8 receptor A                                 | CXCR1   | Swiss Target Prediction |
| <i>Folium Artemisiae Argi</i> (Ai Ye, AY)             | MOL000098 | Quercetin              | CaM kinase II beta                                       | CAMK2B  | Swiss Target Prediction |
| <i>Folium Artemisiae Argi</i> (Ai Ye, AY)             | MOL000098 | Quercetin              | ALK tyrosine kinase receptor                             | ALK     | Swiss Target Prediction |
| <i>Folium Artemisiae Argi</i> (Ai Ye, AY)             | MOL000098 | Quercetin              | Serine/threonine-protein kinase AKT                      | AKT1    | Swiss Target Prediction |
| <i>Folium Artemisiae Argi</i> (Ai Ye, AY)             | MOL000098 | Quercetin              | p-glycoprotein 1                                         | ABCB1   | Swiss Target Prediction |
| <i>Folium Artemisiae Argi</i> (Ai Ye, AY)             | MOL000098 | Quercetin              | Serine/threonine-protein kinase NEK6                     | NEK6    | Swiss Target Prediction |
| <i>Folium Artemisiae Argi</i> (Ai Ye, AY)             | MOL000098 | Quercetin              | Phospholipase A2 group 1B                                | PLA2G1B | Swiss Target Prediction |
| <i>Folium Artemisiae Argi</i> (Ai Ye, AY)             | MOL000098 | Quercetin              | Carbonic anhydrase VA                                    | CASA    | Swiss Target Prediction |
| <i>Folium Artemisiae Argi</i> (Ai Ye, AY)             | MOL000098 | Quercetin              | Beta-secretase 1                                         | BACE1   | Swiss Target Prediction |
| <i>Folium Artemisiae Argi</i> (Ai Ye, AY)             | MOL000098 | Quercetin              | Cytochrome P450 1B1                                      | CYP1B1  | Swiss Target Prediction |
| <i>Folium Artemisiae Argi</i> (Ai Ye, AY)             | MOL000098 | Quercetin              | Tyrosine-protein kinase receptor UFO                     | AXL     | Swiss Target Prediction |
| <i>Folium Artemisiae Argi</i> (Ai Ye, AY)             | MOL000098 | Quercetin              | ATP-binding cassette sub-family G member 2               | ABCG2   | Swiss Target Prediction |
| <i>Folium Artemisiae Argi</i> (Ai Ye, AY)             | MOL000098 | Quercetin              | NUAK family SNF1-like kinase 1                           | NUAK1   | Swiss Target Prediction |
| <i>Folium Artemisiae Argi</i> (Ai Ye, AY)             | MOL000098 | Quercetin              | Aldo-keto reductase family 1 member C2 (b)               | AKR1C2  | Swiss Target Prediction |
| <i>Folium Artemisiae Argi</i> (Ai Ye, AY)             | MOL000098 | Quercetin              | Aldo-keto reductase family 1 member C1 (b)               | AKR1C1  | Swiss Target Prediction |
| <i>Folium Artemisiae Argi</i> (Ai Ye, AY)             | MOL000098 | Quercetin              | Aldo-keto reductase family 1 member C3 (b)               | AKR1C3  | Swiss Target Prediction |
| <i>Folium Artemisiae Argi</i> (Ai Ye, AY)             | MOL000098 | Quercetin              | Aldo-keto reductase family 1 member C4 (b)               | AKR1C4  | Swiss Target Prediction |
| <i>Folium Artemisiae Argi</i> (Ai Ye, AY)             | MOL000098 | Quercetin              | Carbonic anhydrase XIII (by homology)                    | CA13    | Swiss Target Prediction |
| <i>Folium Artemisiae Argi</i> (Ai Ye, AY)             | MOL000098 | Quercetin              | Aldehyde reductase (by homology)                         | AKR1A1  | Swiss Target Prediction |
| <i>Folium Artemisiae Argi</i> (Ai Ye, AY)             | MOL000098 | Quercetin              | G-protein coupled receptor 35                            | GPCR35  | Swiss Target Prediction |
| <i>Folium Artemisiae Argi</i> (Ai Ye, AY)             | MOL000098 | Quercetin              | Tyrosine-protein kinase SYK                              | SYK     | Swiss Target Prediction |
