# Supplementary material for: Network Pharmacology Approach for Predicting Targets of Zishen Yutai Pills on Premature Ovarian Insufficiency
Source: Hindawi journal article supplement (doi:10.1155/2021/8215454), 2021-08-04
Supplement: f1 [file 8215454.f1.zip]

Supplementary Table S2H. Corresponding Targets of RS

| Herb Name                           | Mol ID    | Chemical Name   | Protein Name                               | Symbol   | Sources                         |
|-------------------------------------|-----------|-----------------|--------------------------------------------|----------|---------------------------------|
| <i>Panax Ginseng (Ren Shen, RS)</i> | MOL000787 | Fumarine        | Histamine H1 receptor                      | HRH1     | STITCH                          |
| <i>Panax Ginseng (Ren Shen, RS)</i> | MOL000787 | Fumarine        | KIAA0101                                   | KIAA0101 | STITCH                          |
| <i>Panax Ginseng (Ren Shen, RS)</i> | MOL000787 | Fumarine        | coagulation factor II (thrombin)           | F2       | STITCH                          |
| <i>Panax Ginseng (Ren Shen, RS)</i> | MOL000787 | Fumarine        | cytochrome P450 family 1 subfamih          | CYP1A2   | Pubchem                         |
| <i>Panax Ginseng (Ren Shen, RS)</i> | MOL000787 | Fumarine        | cytochrome P450 family 2 subfamih          | CYP2D6   | Pubchem                         |
| <i>Panax Ginseng (Ren Shen, RS)</i> | MOL000787 | Fumarine        | cytochrome P450 family 2 subfamih          | CYP2C19  | Pubchem                         |
| <i>Panax Ginseng (Ren Shen, RS)</i> | MOL000449 | Stigmasterol    | DNA polymerase beta                        | POLB     | PubChem                         |
| <i>Panax Ginseng (Ren Shen, RS)</i> | MOL002879 | Diop            | Androgen Receptor                          | AR       | PubChem                         |
| <i>Panax Ginseng (Ren Shen, RS)</i> | MOL002879 | Diop            | GLI family zinc finger 3                   | GLI3     | PubChem                         |
| <i>Panax Ginseng (Ren Shen, RS)</i> | MOL002879 | Diop            | nuclear receptor subfamily 1, group 1, me  | NR112    | PubChem                         |
| <i>Panax Ginseng (Ren Shen, RS)</i> | MOL000422 | Kaempferol      | cyclin-dependent kinase 1                  | CDK1     | STITCH                          |
| <i>Panax Ginseng (Ren Shen, RS)</i> | MOL000422 | Kaempferol      | nuclear receptor subfamily 1, group 1, me  | NR112    | STITCH                          |
| <i>Panax Ginseng (Ren Shen, RS)</i> | MOL000422 | Kaempferol      | UDP glycosyltransferase 3 family, polype   | UGT3A1   | STITCH                          |
| <i>Panax Ginseng (Ren Shen, RS)</i> | MOL000422 | Kaempferol      | cytochrome P450, family 1, subfamily B, f  | CYP1B1   | STITCH Swiss Target Prediction  |
| <i>Panax Ginseng (Ren Shen, RS)</i> | MOL000422 | Kaempferol      | ribosomal protein S6 kinase, 90kDa, poly   | RPS6KA3  | STITCH                          |
| <i>Panax Ginseng (Ren Shen, RS)</i> | MOL000422 | Kaempferol      | aryl hydrocarbon receptor                  | AHR      | STITCH Swiss Target Prediction  |
| <i>Panax Ginseng (Ren Shen, RS)</i> | MOL000422 | Kaempferol      | UDP glucuronosyltransferase 1 family, po   | UGT1A3   | STITCH                          |
| <i>Panax Ginseng (Ren Shen, RS)</i> | MOL000422 | Kaempferol      | UDP glucuronosyltransferase 1 family, po   | UGT1A8   | STITCH                          |
| <i>Panax Ginseng (Ren Shen, RS)</i> | MOL000422 | Kaempferol      | UDP glucuronosyltransferase 1 family, po   | UGT1A7   | STITCH                          |
| <i>Panax Ginseng (Ren Shen, RS)</i> | MOL000422 | Kaempferol      | UDP glucuronosyltransferase 1 family, po   | UGT1A9   | STITCH                          |
| <i>Panax Ginseng (Ren Shen, RS)</i> | MOL000422 | Kaempferol      | cytochrome P450 family 1 subfamily A m     | CYP1A2   | PubChem                         |
| <i>Panax Ginseng (Ren Shen, RS)</i> | MOL000422 | Kaempferol      | CDC like kinase 1                          | CLK1     | PubChem                         |
| <i>Panax Ginseng (Ren Shen, RS)</i> | MOL000422 | Kaempferol      | serine/threonine kinase 16                 | STK16    | PubChem                         |
| <i>Panax Ginseng (Ren Shen, RS)</i> | MOL000422 | Kaempferol      | Pim-2 proto-oncogene, serine/threonine l   | PIM2     | PubChem                         |
| <i>Panax Ginseng (Ren Shen, RS)</i> | MOL000422 | Kaempferol      | microtubule associated protein tau         | MAPT     | PubChem                         |
| <i>Panax Ginseng (Ren Shen, RS)</i> | MOL000422 | Kaempferol      | cytochrome P450 family 2 subfamily D m     | CYP2D6   | PubChem                         |
| <i>Panax Ginseng (Ren Shen, RS)</i> | MOL000422 | Kaempferol      | cytochrome P450 family 3 subfamily A m     | CYP3A4   | PubChem                         |
| <i>Panax Ginseng (Ren Shen, RS)</i> | MOL000422 | Kaempferol      | cytochrome P450 family 2 subfamily C m     | CYP2C9   | PubChem                         |
| <i>Panax Ginseng (Ren Shen, RS)</i> | MOL000422 | Kaempferol      | 15-hydroxyprostaglandin dehydrogenase      | HPGD     | PubChem                         |
| <i>Panax Ginseng (Ren Shen, RS)</i> | MOL000422 | Kaempferol      | hypoxia inducible factor 1 subunit alpha   | HIF1A    | PubChem                         |
| <i>Panax Ginseng (Ren Shen, RS)</i> | MOL000422 | Kaempferol      | Cytochrome P450 2C19                       | CYP2C19  | PubChem                         |
| <i>Panax Ginseng (Ren Shen, RS)</i> | MOL000422 | Kaempferol      | glycogen synthase kinase 3 alpha           | GSK3A    | PubChem                         |
| <i>Panax Ginseng (Ren Shen, RS)</i> | MOL000422 | Kaempferol      | glycogen synthase kinase 3 Beta            | GSK3B    | PubChem                         |
| <i>Panax Ginseng (Ren Shen, RS)</i> | MOL000422 | Kaempferol      | cyclin B2                                  | CN82     | PubChem                         |
| <i>Panax Ginseng (Ren Shen, RS)</i> | MOL000422 | Kaempferol      | cyclin B1                                  | CN81     | PubChem                         |
| <i>Panax Ginseng (Ren Shen, RS)</i> | MOL000422 | Kaempferol      | cyclin B3                                  | CN83     | PubChem                         |
| <i>Panax Ginseng (Ren Shen, RS)</i> | MOL000422 | Kaempferol      | cyclin dependent kinase 6                  | CDK6     | PubChem                         |
| <i>Panax Ginseng (Ren Shen, RS)</i> | MOL000422 | Kaempferol      | arachidonate 5-lipoxygenase                | ALOX5    | PubChem Swiss Target Prediction |
| <i>Panax Ginseng (Ren Shen, RS)</i> | MOL000422 | Kaempferol      | glyoxalase I                               | GLO1     | PubChem                         |
| <i>Panax Ginseng (Ren Shen, RS)</i> | MOL000422 | Kaempferol      | xanthine dehydrogenase                     | XDH      | PubChem Swiss Target Prediction |
| <i>Panax Ginseng (Ren Shen, RS)</i> | MOL000422 | Kaempferol      | hydroxysteroid 17-Beta dehydrogenase 1     | HS1D17B1 | PubChem                         |
| <i>Panax Ginseng (Ren Shen, RS)</i> | MOL000422 | Kaempferol      | hydroxysteroid 17-Beta dehydrogenase 2     | HS1D17B2 | PubChem Swiss Target Prediction |
| <i>Panax Ginseng (Ren Shen, RS)</i> | MOL000422 | Kaempferol      | ATP binding cassette subfamily C membe     | ABCC1    | PubChem                         |
| <i>Panax Ginseng (Ren Shen, RS)</i> | MOL000422 | Kaempferol      | androgen receptor                          | AR       | PubChem                         |
| <i>Panax Ginseng (Ren Shen, RS)</i> | MOL000422 | Kaempferol      | butyrylcholinesterase                      | BCHE     | PubChem                         |
| <i>Panax Ginseng (Ren Shen, RS)</i> | MOL000422 | Kaempferol      | platelet activating factor acetylhydrolase | PAFAH1B3 | PubChem                         |
| <i>Panax Ginseng (Ren Shen, RS)</i> | MOL000422 | Kaempferol      | CTD small phosphatase 1                    | CTDSP1   | PubChem                         |
| <i>Panax Ginseng (Ren Shen, RS)</i> | MOL000422 | Kaempferol      | cytochrome P450 family 1 subfamily A m     | CYP1A1   | PubChem                         |
| <i>Panax Ginseng (Ren Shen, RS)</i> | MOL000422 | Kaempferol      | NADPH oxidase 4                            | NOX4     | PubChem Swiss Target Prediction |
| <i>Panax Ginseng (Ren Shen, RS)</i> | MOL000422 | Kaempferol      | ATP binding cassette subfamily G membe     | ABCG2    | PubChem                         |
| <i>Panax Ginseng (Ren Shen, RS)</i> | MOL000422 | Kaempferol      | estrogen receptor 1                        | ESR1     | PubChem                         |
| <i>Panax Ginseng (Ren Shen, RS)</i> | MOL000422 | Kaempferol      | DNA polymerase iota                        | POLI     | PubChem                         |
| <i>Panax Ginseng (Ren Shen, RS)</i> | MOL000422 | Kaempferol      | DNA polymerase eta                         | POLH     | PubChem                         |
| <i>Panax Ginseng (Ren Shen, RS)</i> | MOL000422 | Kaempferol      | cholinergic receptor muscarinic 1          | CHRM     | PubChem                         |
| <i>Panax Ginseng (Ren Shen, RS)</i> | MOL000422 | Kaempferol      | ATP binding cassette subfamily B membe     | ABCB1    | PubChem Swiss Target Prediction |
| <i>Panax Ginseng (Ren Shen, RS)</i> | MOL000422 | Kaempferol      | Rac GTPase activating protein 1            | RACGAP1  | PubChem                         |
| <i>Panax Ginseng (Ren Shen, RS)</i> | MOL000422 | Kaempferol      | aldo-keto reductase family 1 member B      | AKR1B1   | PubChem Swiss Target Prediction |
| <i>Panax Ginseng (Ren Shen, RS)</i> | MOL000422 | Kaempferol      | nuclear factor, erythroid 2 like 2         | NFE2L2   | PubChem                         |
| <i>Panax Ginseng (Ren Shen, RS)</i> | MOL000422 | Kaempferol      | phosphatidylinositol-5-phosphate 4-kinas   | PIP4K2A  | PubChem                         |
| <i>Panax Ginseng (Ren Shen, RS)</i> | MOL000422 | Kaempferol      | ADAM metalloproteinase domain 10           | ADAM10   | PubChem                         |
| <i>Panax Ginseng (Ren Shen, RS)</i> | MOL000422 | Kaempferol      | ADAM metalloproteinase domain 17           | ADAM17   | PubChem                         |
| <i>Panax Ginseng (Ren Shen, RS)</i> | MOL000422 | Kaempferol      | nuclear receptor subfamily 3 group C mer   | NR3C1    | PubChem                         |
| <i>Panax Ginseng (Ren Shen, RS)</i> | MOL000422 | Kaempferol      | fms related tyrosine kinase 3              | FLT3     | PubChem Swiss Target Prediction |
| <i>Panax Ginseng (Ren Shen, RS)</i> | MOL000422 | Kaempferol      | peroxisome proliferator activated recepto  | PPARG    | PubChem                         |
| <i>Panax Ginseng (Ren Shen, RS)</i> | MOL000422 | Kaempferol      | cytochrome P450 family 19 subfamily A r    | CYP19A1  | PubChem                         |
| <i>Panax Ginseng (Ren Shen, RS)</i> | MOL000422 | Kaempferol      | estrogen related receptor alpha            | ESRRA    | PubChem Swiss Target Prediction |
| <i>Panax Ginseng (Ren Shen, RS)</i> | MOL000422 | Kaempferol      | sialic acid acetyltransferase              | SIAE     | PubChem                         |
| <i>Panax Ginseng (Ren Shen, RS)</i> | MOL000422 | Kaempferol      | Beta-secretase 1                           | BACE1    | PubChem                         |
| <i>Panax Ginseng (Ren Shen, RS)</i> | MOL000422 | Kaempferol      | retinoic acid receptor alpha               | RARA     | PubChem                         |
| <i>Panax Ginseng (Ren Shen, RS)</i> | MOL000422 | Kaempferol      | nuclear receptor subfamily 1 group 1 men   | NR113    | PubChem                         |
| <i>Panax Ginseng (Ren Shen, RS)</i> | MOL000422 | Kaempferol      | nuclear factor kappa B subunit 1           | NFKB1    | PubChem                         |
| <i>Panax Ginseng (Ren Shen, RS)</i> | MOL000422 | Kaempferol      | nuclear factor kappa B subunit 2           | NFKB2    | PubChem                         |
| <i>Panax Ginseng (Ren Shen, RS)</i> | MOL000422 | Kaempferol      | RELA proto-oncogene, NF-kB subunit         | RELA     | PubChem                         |
| <i>Panax Ginseng (Ren Shen, RS)</i> | MOL000422 | Kaempferol      | casein kinase 2 alpha 2                    | CSNK2A2  | PubChem                         |
| <i>Panax Ginseng (Ren Shen, RS)</i> | MOL000422 | Kaempferol      | casein kinase 2 Beta                       | CSNK2B   | PubChem                         |
| <i>Panax Ginseng (Ren Shen, RS)</i> | MOL000422 | Kaempferol      | casein kinase 2 alpha 1                    | CSNK2A1  | PubChem                         |
| <i>Panax Ginseng (Ren Shen, RS)</i> | MOL000422 | Kaempferol      | death associated protein kinase 1          | DAPK1    | PubChem                         |
| <i>Panax Ginseng (Ren Shen, RS)</i> | MOL000422 | Kaempferol      | carbonic anhydrase 2                       | CA2      | PubChem Swiss Target Prediction |
| <i>Panax Ginseng (Ren Shen, RS)</i> | MOL000422 | Kaempferol      | carbonic anhydrase 7                       | CA7      | PubChem Swiss Target Prediction |
| <i>Panax Ginseng (Ren Shen, RS)</i> | MOL000422 | Kaempferol      | carbonic anhydrase 12                      | CA12     | PubChem Swiss Target Prediction |
| <i>Panax Ginseng (Ren Shen, RS)</i> | MOL000422 | Kaempferol      | histone deacetylase 9                      | HDA9     | PubChem                         |
| <i>Panax Ginseng (Ren Shen, RS)</i> | MOL000422 | Kaempferol      | GLI family zinc finger 3                   | GLI3     | PubChem                         |
| <i>Panax Ginseng (Ren Shen, RS)</i> | MOL000422 | Kaempferol      | estrogen receptor 2                        | ESR2     | PubChem                         |
| <i>Panax Ginseng (Ren Shen, RS)</i> | MOL000422 | Kaempferol      | amyloid Beta precursor protein             | APP      | PubChem                         |
| <i>Panax Ginseng (Ren Shen, RS)</i> | MOL000422 | Kaempferol      | CDGSH iron sulfur domain 1                 | CISD1    | PubChem                         |
| <i>Panax Ginseng (Ren Shen, RS)</i> | MOL000422 | Kaempferol      | Tyrosinase                                 | TYR      | PubChem Swiss Target Prediction |
| <i>Panax Ginseng (Ren Shen, RS)</i> | MOL000422 | Kaempferol      | Progesterone receptor                      | PGR      | PubChem                         |
| <i>Panax Ginseng (Ren Shen, RS)</i> | MOL000422 | Kaempferol      | SMAD family member 2                       | SMAD2    | PubChem                         |
| <i>Panax Ginseng (Ren Shen, RS)</i> | MOL000422 | Kaempferol      | SMAD family member 3                       | SMAD3    | PubChem                         |
| <i>Panax Ginseng (Ren Shen, RS)</i> | MOL000422 | Kaempferol      | solute carrier family 2 member 1           | SLC2A1   | PubChem                         |
| <i>Panax Ginseng (Ren Shen, RS)</i> | MOL000422 | Kaempferol      | dipeptidyl peptidase 4                     | DPPIA    | PubChem                         |
| <i>Panax Ginseng (Ren Shen, RS)</i> | MOL000422 | Kaempferol      | myeloperoxidase                            | MPO      | PubChem                         |
| <i>Panax Ginseng (Ren Shen, RS)</i> | MOL000422 | Kaempferol      | Adenosine A1 receptor (by homology)        | ADORA1   | Swiss Target Prediction         |
| <i>Panax Ginseng (Ren Shen, RS)</i> | MOL000422 | Kaempferol      | Carbonic anhydrase IV                      | CA4      | Swiss Target Prediction         |
| <i>Panax Ginseng (Ren Shen, RS)</i> | MOL000358 | Beta-sitosterol | DNA polymerase beta                        | POLB     | PubChem                         |
| <i>Panax Ginseng (Ren Shen, RS)</i> | MOL000358 | Beta-sitosterol | glycogen synthase kinase 3 beta            | GSK3B    | PubChem                         |
| <i>Panax Ginseng (Ren Shen, RS)</i> | MOL000358 | Beta-sitosterol | protein kinase AMP-activated non-cataly    | PRKAB2   | PubChem                         |
| <i>Panax Ginseng (Ren Shen, RS)</i> | MOL000358 | Beta-sitosterol | protein kinase AMP-activated non-cataly    | PRKAG3   | PubChem                         |
| <i>Panax Ginseng (Ren Shen, RS)</i> | MOL000358 | Beta-sitosterol | protein kinase AMP-activated non-cataly    | PRKAG1   | PubChem                         |
| <i>Panax Ginseng (Ren Shen, RS)</i> | MOL000358 | Beta-sitosterol | protein kinase AMP-activated catalytic s   | PRKAA1   | PubChem                         |
| <i>Panax Ginseng (Ren Shen, RS)</i> | MOL000358 | Beta-sitosterol | protein kinase AMP-activated catalytic s   | PRKAA2   | PubChem                         |
| <i>Panax Ginseng (Ren Shen, RS)</i> | MOL000358 | Beta-sitosterol | protein kinase AMP-activated non-cataly    | PRKAB1   | PubChem                         |
| <i>Panax Ginseng (Ren Shen, RS)</i> | MOL000358 | Beta-sitosterol | protein kinase AMP-activated non-cataly    | PRKAG2   | PubChem                         |
| <i>Panax Ginseng (Ren Shen, RS)</i> | MOL000358 | Beta-sitosterol | dipeptidyl peptidase 4                     | DPPIA    | PubChem                         |
| <i>Panax Ginseng (Ren Shen, RS)</i> | MOL000358 | Beta-sitosterol | coagulation factor II, thrombin            | F2       | PubChem                         |
| <i>Panax Ginseng (Ren Shen, RS)</i> | MOL005344 | Ginsenoside rh2 | BCL2-related protein A1                    | BCL2A1   | STITCH                          |
| <i>Panax Ginseng (Ren Shen, RS)</i> | MOL005344 | Ginsenoside rh2 | Rh-associated glycoprotein                 | RHAG     | STITCH                          |
| <i>Panax Ginseng (Ren Shen, RS)</i> | MOL005344 | Ginsenoside rh2 | sirtuin 1                                  | SIRT1    | PubChem                         |
| <i>Panax Ginseng (Ren Shen, RS)</i> | MOL005320 | Arachidonate    | Fatty acid binding protein adipocyte       | FABP4    | Swiss Target Prediction         |
| <i>Panax Ginseng (Ren Shen, RS)</i> | MOL005320 | Arachidonate    | Peroxisome proliferator-activated re       | PPARG    | Swiss Target Prediction         |
| <i>Panax Ginseng (Ren Shen, RS)</i> | MOL005320 | Arachidonate    | Peroxisome proliferator-activated re       | PPARA    | Swiss Target Prediction         |
| <i>Panax Ginseng (Ren Shen, RS)</i> | MOL005320 | Arachidonate    | Peroxisome proliferator-activated re       | PPARD    | Swiss Target Prediction         |
