# Supplementary material for: Network Pharmacology Approach for Predicting Targets of Zishen Yutai Pills on Premature Ovarian Insufficiency
Source: Hindawi journal article supplement (doi:10.1155/2021/8215454), 2021-08-04
Supplement: f1 [file 8215454.f1.zip]

| Supplementary Table S2H. Corresponding Targets of SR |           |                            |                                                      |        |                         |
|------------------------------------------------------|-----------|----------------------------|------------------------------------------------------|--------|-------------------------|
| Herb Name                                            | Mol ID    | Chemical Name              | Protein Name                                         | Symbol | Sources                 |
| <i>Amomum Aurantiacum</i> (Sha Ren, SR)              | MOL000358 | Beta-sitosterol            | DNA polymerase beta                                  | POLB   | PubChem                 |
| <i>Amomum Aurantiacum</i> (Sha Ren, SR)              | MOL000358 | Beta-sitosterol            | glycogen synthase kinase 3 beta                      | GSK3B  | PubChem                 |
| <i>Amomum Aurantiacum</i> (Sha Ren, SR)              | MOL000358 | Beta-sitosterol            | protein kinase AMP-activated non-catalytic subunit   | PRKAB2 | PubChem                 |
| <i>Amomum Aurantiacum</i> (Sha Ren, SR)              | MOL000358 | Beta-sitosterol            | protein kinase AMP-activated non-catalytic subunit   | PRKAG3 | PubChem                 |
| <i>Amomum Aurantiacum</i> (Sha Ren, SR)              | MOL000358 | Beta-sitosterol            | protein kinase AMP-activated non-catalytic subunit   | PRKAG1 | PubChem                 |
| <i>Amomum Aurantiacum</i> (Sha Ren, SR)              | MOL000358 | Beta-sitosterol            | protein kinase AMP-activated catalytic subunit alpha | PRKAA1 | PubChem                 |
| <i>Amomum Aurantiacum</i> (Sha Ren, SR)              | MOL000358 | Beta-sitosterol            | protein kinase AMP-activated catalytic subunit alpha | PRKAA2 | PubChem                 |
| <i>Amomum Aurantiacum</i> (Sha Ren, SR)              | MOL000358 | Beta-sitosterol            | protein kinase AMP-activated non-catalytic subunit   | PRKAB1 | PubChem                 |
| <i>Amomum Aurantiacum</i> (Sha Ren, SR)              | MOL000358 | Beta-sitosterol            | protein kinase AMP-activated non-catalytic subunit   | PRKAG2 | PubChem                 |
| <i>Amomum Aurantiacum</i> (Sha Ren, SR)              | MOL000358 | Beta-sitosterol            | dipeptidyl peptidase 4                               | DPP4   | PubChem                 |
| <i>Amomum Aurantiacum</i> (Sha Ren, SR)              | MOL000358 | Beta-sitosterol            | coagulation factor II, thrombin                      | F2     | PubChem                 |
| <i>Amomum Aurantiacum</i> (Sha Ren, SR)              | MOL000449 | Stigmasterol               | DNA polymerase beta                                  | POLB   | PubChem                 |
| <i>Amomum Aurantiacum</i> (Sha Ren, SR)              | MOL001755 | 24-Ethylcholest-4-en-3-one | Steroid 5-alpha-reductase 1                          | SRD5A1 | Swiss Target Prediction |
