# Supplementary material for: Network Pharmacology Approach for Predicting Targets of Zishen Yutai Pills on Premature Ovarian Insufficiency
Source: Hindawi journal article supplement (doi:10.1155/2021/8215454), 2021-08-04
Supplement: f1 [file 8215454.f1.zip]

| Supplementary Table S2F. Corresponding Targets of BZ  |           |                 |                                                        |        |         |
|-------------------------------------------------------|-----------|-----------------|--------------------------------------------------------|--------|---------|
| Herb Name                                             | Mol ID    | Chemical Name   | Protein Name                                           | Symbol | Sources |
| <i>Atractylodes Macrocephala</i> Koidz. (Bai Zhu, BZ) | MOL000358 | Beta-sitosterol | DNA polymerase beta                                    | POLB   | PubChem |
| <i>Atractylodes Macrocephala</i> Koidz. (Bai Zhu, BZ) | MOL000358 | Beta-sitosterol | glycogen synthase kinase 3 beta                        | GSK3B  | PubChem |
| <i>Atractylodes Macrocephala</i> Koidz. (Bai Zhu, BZ) | MOL000358 | Beta-sitosterol | protein kinase AMP-activated non-catalytic subunit be  | PRKAB2 | PubChem |
| <i>Atractylodes Macrocephala</i> Koidz. (Bai Zhu, BZ) | MOL000358 | Beta-sitosterol | protein kinase AMP-activated non-catalytic subunit ga  | PRKAG3 | PubChem |
| <i>Atractylodes Macrocephala</i> Koidz. (Bai Zhu, BZ) | MOL000358 | Beta-sitosterol | protein kinase AMP-activated non-catalytic subunit ga  | PRKAG1 | PubChem |
| <i>Atractylodes Macrocephala</i> Koidz. (Bai Zhu, BZ) | MOL000358 | Beta-sitosterol | protein kinase AMP-activated catalytic subunit alpha 1 | PRKAA1 | PubChem |
| <i>Atractylodes Macrocephala</i> Koidz. (Bai Zhu, BZ) | MOL000358 | Beta-sitosterol | protein kinase AMP-activated catalytic subunit alpha 2 | PRKAA2 | PubChem |
| <i>Atractylodes Macrocephala</i> Koidz. (Bai Zhu, BZ) | MOL000358 | Beta-sitosterol | protein kinase AMP-activated non-catalytic subunit be  | PRKAB1 | PubChem |
| <i>Atractylodes Macrocephala</i> Koidz. (Bai Zhu, BZ) | MOL000358 | Beta-sitosterol | protein kinase AMP-activated non-catalytic subunit ga  | PRKAG2 | PubChem |
| <i>Atractylodes Macrocephala</i> Koidz. (Bai Zhu, BZ) | MOL000358 | Beta-sitosterol | dipeptidyl peptidase 4                                 | DPP4   | PubChem |
| <i>Atractylodes Macrocephala</i> Koidz. (Bai Zhu, BZ) | MOL000358 | Beta-sitosterol | coagulation factor II, thrombin                        | F2     | PubChem |
