# Supplementary material for: Network Pharmacology Approach for Predicting Targets of Zishen Yutai Pills on Premature Ovarian Insufficiency
Source: Hindawi journal article supplement (doi:10.1155/2021/8215454), 2021-08-04
Supplement: f1 [file 8215454.f1.zip]

| Table S8D Kyoto Encyclopedia of Genes and Genomes (KEGG) Pathway analysis |                              |              |              |                                                                                                                                                                                                           |
|---------------------------------------------------------------------------|------------------------------|--------------|--------------|-----------------------------------------------------------------------------------------------------------------------------------------------------------------------------------------------------------|
| GO ID                                                                     | GO Term                      | Term P value | No. of Genes | Associated Genes Found                                                                                                                                                                                    |
| KEGG:05203                                                                | Viral carcinogenesis         | 6.19E-17     | 30           | [ACTN1, ACTN4, CCND1, CDKN2A, CHD4, CHEK1, H2BC21, H4-16, H4C1, H4C11, H4C12, H4C13, H4C14, H4C15, H4C2, H4C3, H4C4, H4C5, H4C6, H4C8, H4C9, HDAC3, HDAC5, HDAC6, HNRNPK, JAK1, KAT2A, PIK3R2, PKM, SKP2] |
| KEGG:03040                                                                | Spliceosome                  | 1.28E-15     | 25           | [ALYREF, DDX5, DHX15, EFTUD2, HNRNPK, HNRNPM, HSPA6, NCBP1, PRPF19, PRPF40A, PRPF8, RBMX, SF3A1, SF3B1, SF3B2, SF3B3, SNRNP200, SNRNP70, SNRPA1, SNRPB, SRSF1, SRSF2, SRSF3, TRA2A, U2AF2]                |
| KEGG:05322                                                                | Systemic lupus erythematosus | 1.53E-12     | 21           | [ACTN1, ACTN4, H2AC20, H2AX, H2BC21, H4-16, H4C1, H4C11, H4C12, H4C13, H4C14, H4C15, H4C2, H4C3, H4C4, H4C5, H4C6, H4C8, H4C9, MACROH2A1, SNRPB]                                                          |
| KEGG:03010                                                                | Ribosome                     | 2.98E-11     | 21           | [RPL10A, RPL11, RPL13, RPL14, RPL23, RPL5, RPL6, RPL7, RPL8, RPL9, RPLP0, RPS16, RPS19, RPS2, RPS20, RPS21, RPS3, RPS4X, RPS6, RPS8, RPSA]                                                                |
| KEGG:05034                                                                | Alcoholism                   | 7.36E-10     | 21           | [H2AC20, H2AX, H2BC21, H4-16, H4C1, H4C11, H4C12, H4C13, H4C14, H4C15, H4C2, H4C3, H4C4, H4C5, H4C6, H4C8, H4C9, HDAC3, HDAC5, HDAC6, MACROH2A1]                                                          |
| KEGG:04110                                                                | Cell cycle                   | 5.43E-07     | 14           | [ATR, CCND1, CDC27, CDK7, CDKN2A, CHEK1, E2F1, PRKDC, RAD21, RBX1, SKP1, SKP2, SMC1A, SMC3]                                                                                                               |
| KEGG:04066                                                                | HIF-1 signaling pathway      | 2.73E-05     | 11           | [ALDOA, ENO1, GAPDH, IGF1R, LDHA, LDHB, PIK3R2, PRKCB, RBX1, RPS6, RPS6KB2]                                                                                                                               |
| KEGG:05225                                                                | Hepatocellular carcinoma     | 8.62E-05     | 13           | [ACTB, CCND1, CDKN2A, CSNK1A1, E2F1, IGF1R, PIK3R2, PRKCB, RPS6KB2, SMARCA4, SMARCB1, SMARCC1, SMARCC2]                                                                                                   |
| KEGG:00010                                                                | Glycolysis / Gluconeogenesis | 7.28E-04     | 7            | [ALDOA, ENO1, GAPDH, LDHA, LDHB, PKM, TPI1]                                                                                                                                                               |
