# Supplementary material for: Network Pharmacology Approach for Predicting Targets of Zishen Yutai Pills on Premature Ovarian Insufficiency
Source: Hindawi journal article supplement (doi:10.1155/2021/8215454), 2021-08-04
Supplement: f1 [file 8215454.f1.zip]

| Supplementary Table S2K. Corresponding Targets of SJS |           |               |                                    |         |                         |
|-------------------------------------------------------|-----------|---------------|------------------------------------|---------|-------------------------|
| Herb Name                                             | Mol ID    | Chemical Name | Protein Name                       | Symbol  | Sources                 |
| Herba Taxili (Sang Ji Sheng, SJS)                     | MOL000098 | Quercetin     | Induced myeloid leukemia cel       | MCL1    | STITCH                  |
| Herba Taxili (Sang Ji Sheng, SJS)                     | MOL000098 | Quercetin     | Tyrosine-protein kinase HCK        | HCK     | STITCH                  |
| Herba Taxili (Sang Ji Sheng, SJS)                     | MOL000098 | Quercetin     | Solute carrier family 2, facilitat | SLC2A2  | STITCH                  |
| Herba Taxili (Sang Ji Sheng, SJS)                     | MOL000098 | Quercetin     | Cytochrome P450 2C8                | CYP2C8  | STITCH                  |
| Herba Taxili (Sang Ji Sheng, SJS)                     | MOL000098 | Quercetin     | ATP synthase subunit Beta, mi      | ATP5B   | STITCH                  |
| Herba Taxili (Sang Ji Sheng, SJS)                     | MOL000098 | Quercetin     | 3-hydroxyisobutyryl-CoA hydr       | HIBCH   | STITCH                  |
| Herba Taxili (Sang Ji Sheng, SJS)                     | MOL000098 | Quercetin     | serine/threonine kinase 17b        | STK17B  | STITCH                  |
| Herba Taxili (Sang Ji Sheng, SJS)                     | MOL000098 | Quercetin     | NADPH oxidase 4                    | NOX4    | Swiss Target Prediction |
| Herba Taxili (Sang Ji Sheng, SJS)                     | MOL000098 | Quercetin     | Vasopressin V2 receptor            | AVPR2   | Swiss Target Prediction |
| Herba Taxili (Sang Ji Sheng, SJS)                     | MOL000098 | Quercetin     | Aldose reductase                   | AKR1B1  | Swiss Target Prediction |
| Herba Taxili (Sang Ji Sheng, SJS)                     | MOL000098 | Quercetin     | Xanthine dehydrogenase             | XDH     | Swiss Target Prediction |
| Herba Taxili (Sang Ji Sheng, SJS)                     | MOL000098 | Quercetin     | Monoamine oxidase A                | MAOA    | Swiss Target Prediction |
| Herba Taxili (Sang Ji Sheng, SJS)                     | MOL000098 | Quercetin     | Insulin-like growth factor I rec   | IGF1R   | Swiss Target Prediction |
| Herba Taxili (Sang Ji Sheng, SJS)                     | MOL000098 | Quercetin     | Tyrosine-protein kinase recep      | FLT3    | Swiss Target Prediction |
| Herba Taxili (Sang Ji Sheng, SJS)                     | MOL000098 | Quercetin     | Cytochrome P450 19A1               | CYP19A1 | Swiss Target Prediction |
| Herba Taxili (Sang Ji Sheng, SJS)                     | MOL000098 | Quercetin     | Epidermal growth factor recep      | EGFR    | Swiss Target Prediction |
| Herba Taxili (Sang Ji Sheng, SJS)                     | MOL000098 | Quercetin     | Thrombin                           | F2      | Swiss Target Prediction |
| Herba Taxili (Sang Ji Sheng, SJS)                     | MOL000098 | Quercetin     | Carbonic anhydrase II              | CA2     | Swiss Target Prediction |
| Herba Taxili (Sang Ji Sheng, SJS)                     | MOL000098 | Quercetin     | Serine/threonine-protein kina      | PIM1    | Swiss Target Prediction |
| Herba Taxili (Sang Ji Sheng, SJS)                     | MOL000098 | Quercetin     | Arachidonate 5-lipoxygenase        | ALOX5   | Swiss Target Prediction |
| Herba Taxili (Sang Ji Sheng, SJS)                     | MOL000098 | Quercetin     | Serine/threonine-protein kina      | AURKB   | Swiss Target Prediction |
| Herba Taxili (Sang Ji Sheng, SJS)                     | MOL000098 | Quercetin     | Dopamine D4 receptor               | DRD4    | Swiss Target Prediction |
| Herba Taxili (Sang Ji Sheng, SJS)                     | MOL000098 | Quercetin     | Adenosine A1 receptor (by ho       | ADORA1  | Swiss Target Prediction |
| Herba Taxili (Sang Ji Sheng, SJS)                     | MOL000098 | Quercetin     | Carbonic anhydrase VII             | CA7     | Swiss Target Prediction |
| Herba Taxili (Sang Ji Sheng, SJS)                     | MOL000098 | Quercetin     | Glyoxalase I                       | GLO1    | Swiss Target Prediction |
| Herba Taxili (Sang Ji Sheng, SJS)                     | MOL000098 | Quercetin     | Myeloperoxidase                    | MPO     | Swiss Target Prediction |
| Herba Taxili (Sang Ji Sheng, SJS)                     | MOL000098 | Quercetin     | PI3-kinase p85-alpha subunit       | PIK3R1  | Swiss Target Prediction |
| Herba Taxili (Sang Ji Sheng, SJS)                     | MOL000098 | Quercetin     | Adenosine A2a receptor (by I       | ADORA2A | Swiss Target Prediction |
| Herba Taxili (Sang Ji Sheng, SJS)                     | MOL000098 | Quercetin     | Death-associated protein kina      | DAPK1   | Swiss Target Prediction |
| Herba Taxili (Sang Ji Sheng, SJS)                     | MOL000098 | Quercetin     | Liver glycogen phosphorylase       | PYGL    | Swiss Target Prediction |
| Herba Taxili (Sang Ji Sheng, SJS)                     | MOL000098 | Quercetin     | Carbonic anhydrase I               | CA1     | Swiss Target Prediction |
| Herba Taxili (Sang Ji Sheng, SJS)                     | MOL000098 | Quercetin     | Glycogen synthase kinase-3 B       | GSK3B   | Swiss Target Prediction |
| Herba Taxili (Sang Ji Sheng, SJS)                     | MOL000098 | Quercetin     | Tyrosine-protein kinase SRC        | SRC     | Swiss Target Prediction |
| Herba Taxili (Sang Ji Sheng, SJS)                     | MOL000098 | Quercetin     | Focal adhesion kinase 1            | PTK2    | Swiss Target Prediction |
| Herba Taxili (Sang Ji Sheng, SJS)                     | MOL000098 | Quercetin     | Estradiol 17-Beta-dehydrogen       | HSD17B2 | Swiss Target Prediction |
| Herba Taxili (Sang Ji Sheng, SJS)                     | MOL000098 | Quercetin     | Vascular endothelial growth fa     | KDR     | Swiss Target Prediction |
| Herba Taxili (Sang Ji Sheng, SJS)                     | MOL000098 | Quercetin     | Matrix metalloproteinase 13        | MMP13   | Swiss Target Prediction |
| Herba Taxili (Sang Ji Sheng, SJS)                     | MOL000098 | Quercetin     | Matrix metalloproteinase 3         | MMP3    | Swiss Target Prediction |
| Herba Taxili (Sang Ji Sheng, SJS)                     | MOL000098 | Quercetin     | Carbonic anhydrase III             | CA3     | Swiss Target Prediction |
| Herba Taxili (Sang Ji Sheng, SJS)                     | MOL000098 | Quercetin     | Arachidonate 15-lipoxygenase       | ALOX15  | Swiss Target Prediction |
| Herba Taxili (Sang Ji Sheng, SJS)                     | MOL000098 | Quercetin     | Multidrug resistance-associat      | ABCC1   | Swiss Target Prediction |
| Herba Taxili (Sang Ji Sheng, SJS)                     | MOL000098 | Quercetin     | Serine/threonine-protein kina      | PLK1    | Swiss Target Prediction |
| Herba Taxili (Sang Ji Sheng, SJS)                     | MOL000098 | Quercetin     | Carbonic anhydrase VI              | CA6     | Swiss Target Prediction |
| Herba Taxili (Sang Ji Sheng, SJS)                     | MOL000098 | Quercetin     | Cyclin-dependent kinase 1          | CDK1    | Swiss Target Prediction |
| Herba Taxili (Sang Ji Sheng, SJS)                     | MOL000098 | Quercetin     | Matrix metalloproteinase 9         | MMP9    | Swiss Target Prediction |
| Herba Taxili (Sang Ji Sheng, SJS)                     | MOL000098 | Quercetin     | Carbonic anhydrase XII             | CA12    | Swiss Target Prediction |
| Herba Taxili (Sang Ji Sheng, SJS)                     | MOL000098 | Quercetin     | Matrix metalloproteinase 2         | MMP2    | Swiss Target Prediction |
| Herba Taxili (Sang Ji Sheng, SJS)                     | MOL000098 | Quercetin     | Protein kinase N1                  | PKN1    | Swiss Target Prediction |
| Herba Taxili (Sang Ji Sheng, SJS)                     | MOL000098 | Quercetin     | Carbonic anhydrase XIV             | CA14    | Swiss Target Prediction |
| Herba Taxili (Sang Ji Sheng, SJS)                     | MOL000098 | Quercetin     | Carbonic anhydrase IX              | CA9     | Swiss Target Prediction |
| Herba Taxili (Sang Ji Sheng, SJS)                     | MOL000098 | Quercetin     | Casein kinase II alpha             | CSNK2A1 | Swiss Target Prediction |
| Herba Taxili (Sang Ji Sheng, SJS)                     | MOL000098 | Quercetin     | Arachidonate 12-lipoxygenase       | ALOX12  | Swiss Target Prediction |
| Herba Taxili (Sang Ji Sheng, SJS)                     | MOL000098 | Quercetin     | Hepatocyte growth factor rece      | MET     | Swiss Target Prediction |
| Herba Taxili (Sang Ji Sheng, SJS)                     | MOL000098 | Quercetin     | Carbonic anhydrase IV              | CA4     | Swiss Target Prediction |
| Herba Taxili (Sang Ji Sheng, SJS)                     | MOL000098 | Quercetin     | Serine/threonine-protein kina      | NEK2    | Swiss Target Prediction |
| Herba Taxili (Sang Ji Sheng, SJS)                     | MOL000098 | Quercetin     | Interleukin-8 receptor A           | CXCR1   | Swiss Target Prediction |
| Herba Taxili (Sang Ji Sheng, SJS)                     | MOL000098 | Quercetin     | CaM kinase II Beta                 | CAMK2B  | Swiss Target Prediction |
| Herba Taxili (Sang Ji Sheng, SJS)                     | MOL000098 | Quercetin     | ALK tyrosine kinase receptor       | ALK     | Swiss Target Prediction |
| Herba Taxili (Sang Ji Sheng, SJS)                     | MOL000098 | Quercetin     | Serine/threonine-protein kina      | AKT1    | Swiss Target Prediction |
| Herba Taxili (Sang Ji Sheng, SJS)                     | MOL000098 | Quercetin     | P-glycoprotein 1                   | ABCB1   | Swiss Target Prediction |
| Herba Taxili (Sang Ji Sheng, SJS)                     | MOL000098 | Quercetin     | Serine/threonine-protein kina      | NEK6    | Swiss Target Prediction |
| Herba Taxili (Sang Ji Sheng, SJS)                     | MOL000098 | Quercetin     | Phospholipase A2 group 1B          | PLA2G1B | Swiss Target Prediction |
| Herba Taxili (Sang Ji Sheng, SJS)                     | MOL000098 | Quercetin     | Carbonic anhydrase VA              | CA5A    | Swiss Target Prediction |
| Herba Taxili (Sang Ji Sheng, SJS)                     | MOL000098 | Quercetin     | Beta-secretase 1                   | BACE1   | Swiss Target Prediction |
| Herba Taxili (Sang Ji Sheng, SJS)                     | MOL000098 | Quercetin     | Cytochrome P450 1B1                | CYP1B1  | Swiss Target Prediction |
| Herba Taxili (Sang Ji Sheng, SJS)                     | MOL000098 | Quercetin     | Tyrosine-protein kinase recep      | AXL     | Swiss Target Prediction |
| Herba Taxili (Sang Ji Sheng, SJS)                     | MOL000098 | Quercetin     | ATP-binding cassette sub-fam       | ABCG2   | Swiss Target Prediction |
| Herba Taxili (Sang Ji Sheng, SJS)                     | MOL000098 | Quercetin     | NUAK family SNF1-like kinase       | NUAK1   | Swiss Target Prediction |
| Herba Taxili (Sang Ji Sheng, SJS)                     | MOL000098 | Quercetin     | Aldo-keto reductase family 1 r     | AKR1C2  | Swiss Target Prediction |
| Herba Taxili (Sang Ji Sheng, SJS)                     | MOL000098 | Quercetin     | Aldo-keto reductase family 1 r     | AKR1C1  | Swiss Target Prediction |
| Herba Taxili (Sang Ji Sheng, SJS)                     | MOL000098 | Quercetin     | Aldo-keto-reductase family 1 i     | AKR1C3  | Swiss Target Prediction |
| Herba Taxili (Sang Ji Sheng, SJS)                     | MOL000098 | Quercetin     | Aldo-keto reductase family 1 r     | AKR1C4  | Swiss Target Prediction |
| Herba Taxili (Sang Ji Sheng, SJS)                     | MOL000098 | Quercetin     | Carbonic anhydrase XIII (by f      | CA13    | Swiss Target Prediction |
| Herba Taxili (Sang Ji Sheng, SJS)                     | MOL000098 | Quercetin     | Aldehyde reductase (by hom         | AKR1A1  | Swiss Target Prediction |
| Herba Taxili (Sang Ji Sheng, SJS)                     | MOL000098 | Quercetin     | G-protein coupled receptor 35      | GPR35   | Swiss Target Prediction |
| Herba Taxili (Sang Ji Sheng, SJS)                     | MOL000098 | Quercetin     | Tyrosine-protein kinase SYK        | SYK     | Swiss Target Prediction |
