# Supplementary material for: Network Pharmacology Approach for Predicting Targets of Zishen Yutai Pills on Premature Ovarian Insufficiency
Source: Hindawi journal article supplement (doi:10.1155/2021/8215454), 2021-08-04
Supplement: f1 [file 8215454.f1.zip]

Table S3 POI targets

| Protein Name                                                                              | Gene Symbol |
|-------------------------------------------------------------------------------------------|-------------|
| BRCA2 DNA repair associated                                                               | BRCA2       |
| FMRP translational regulator 1                                                            | FMR1        |
| tumour protein p53                                                                        | TP53        |
| forkhead box L2                                                                           | FOXK2       |
| follicle stimulating hormone receptor                                                     | FSHR        |
| nuclear receptor subfamily 5 group A member 1                                             | NR5A1       |
| Tumour necrosis Factor                                                                    | TNF         |
| methylenetetrahydrofolate reductase                                                       | MTHFR       |
| interleukin 6                                                                             | IL6         |
| vascular endothelial growth factor A                                                      | VEGFA       |
| Sirtuin 1                                                                                 | SIRT1       |
| Estrogen Receptor 2                                                                       | ESR2        |
| Growth differentiation factor 9                                                           | GDF9        |
| Transforming Growth factor beta 1                                                         | TGFB1       |
| Androgen receptor                                                                         | AR          |
| adiponectin, C1Q and collagen domain containing                                           | ADIPOQ      |
| matrix metalloproteinase 9                                                                | MMP9        |
| X-ray repair cross complementing 2                                                        | XRCC2       |
| Leptin                                                                                    | LEP         |
| C-reactive Protein                                                                        | CRP         |
| Angiotensin I converting enzyme                                                           | ACE         |
| insulin like growth factor 1                                                              | IGF1        |
| CF transmembrane conductance regulator                                                    | CFTR        |
| interleukin 10                                                                            | IL10        |
| Toll like receptor 4                                                                      | TLR4        |
| bone morphogenetic protein 15                                                             | BMP15       |
| brain derived neurotrophic factor                                                         | BDNF        |
| anti-Mullerian Hormone                                                                    | AMH         |
| matrix metalloproteinase 2                                                                | MMP2        |
| cyclin dependent kinase inhibitor 1B                                                      | CDKN1B      |
| catechol-O-methyltransferase                                                              | COMT        |
| GC vitamin D binding protein                                                              | GC          |
| poly(ADP-ribose) polymerase 1                                                             | PARP1       |
| tumour protein p53                                                                        | TP53        |
| NOBOX oogenesis homeobox                                                                  | NOBOX       |
| FA complementation group M                                                                | FANCM       |
| lamin A/C                                                                                 | LMNA        |
| minichromosome maintenance 8 homologous recombination repair factor                       | MCM8        |
| major histocompatibility complex, class I, G                                              | HLA-G       |
| intercellular adhesion molecule 1                                                         | ICAM1       |
| Nitric Oxide Synthase 3                                                                   | NOS3        |
| Inhibin subunit alpha                                                                     | INHBA       |
| endothelin 1                                                                              | EDN1        |
| advanced glycosylation end-product specific receptor                                      | AGER        |
| glutathione S-transferase theta 1                                                         | GSTT1       |
| Galectin 3                                                                                | LGALS3      |
| WT1 Transcription factor                                                                  | WT1         |
| Forkhead box O3                                                                           | FOXO3       |
| mutS homolog 5                                                                            | MSH5        |
| basonuclin 1                                                                              | BNC1        |
| fms related receptor tyrosine kinase 1                                                    | FLT1        |
| angiotensin II receptor type 1                                                            | AGTR1       |
| BUB1 mitotic checkpoint serine/threonine kinase B                                         | BUB1B       |
| interleukin 17A                                                                           | IL17A       |
| natriuretic peptide B                                                                     | NPPB        |
| synuclein alpha                                                                           | SNCA        |
| cytochrome P450 family 11 subfamily A member 1                                            | CYP11A1     |
| mannose binding lectin 2                                                                  | MBL2        |
| matrix metalloproteinase 3                                                                | MMP3        |
| Stromal antigen 3                                                                         | STAG3       |
| diaphanous related formin 2                                                               | DIAPH2      |
| collagen type I alpha 1 chain                                                             | COL1A1      |
| TIMP metalloproteinase inhibitor 1                                                        | TIMP1       |
| folliculogenesis specific bHLH transcription factor                                       | FIGLA       |
| TNF receptor superfamily member 11b                                                       | TNFRSF11B   |
| nuclear receptor subfamily 3 group C member 1                                             | NR3C1       |
| Fibrillin 1                                                                               | FBN1        |
| FTO alpha-ketoglutarate dependent dioxygenase                                             | FTO         |
| alkaline phosphatase, biomineralization associated                                        | ALPL        |
| fragile site, folic acid type, rare, fra(X)(q27.3) A (macroorchidism, mental retardation) | FRAXA       |
| C-C motif chemokine ligand 5                                                              | CCL5        |
| bone morphogenetic protein 4                                                              | BMP4        |
| synaptonemal complex central element protein 1                                            | SYCE1       |
| aldehyde dehydrogenase 2 family member                                                    | ALDH2       |
| fibroblast growth factor receptor 3                                                       | FGFR3       |
| von Hippel-Lindau tumor suppressor                                                        | VHL         |
| TNF superfamily member 11                                                                 | TNFSF11     |
| helicase for meiosis 1                                                                    | HFM1        |
| DNA polymerase gamma, catalytic subunit                                                   | POLG        |
| galactose-1-phosphate uridylyltransferase                                                 | GALT        |
| Prolactin                                                                                 | PRL         |
| insulin like growth factor binding protein 1                                              | IGFBP1      |
| exportin 1                                                                                | XPO1        |
| Y-box binding protein 1                                                                   | YBX1        |
| vascular cell adhesion molecule 1                                                         | VCAM1       |
| Retinol binding protein 4                                                                 | RBP4        |
| beta-2-microglobulin                                                                      | B2M         |
| S100 calcium binding protein A9                                                           | S100A9      |
| matrix metalloproteinase 13                                                               | MMP13       |
| serine peptidase inhibitor Kazal type 1                                                   | SPINK1      |
| X-ray repair cross complementing 6                                                        | XRCC6       |
| minichromosome maintenance 9 homologous recombination repair factor                       | MCM9        |
| spalt like transcription factor 4                                                         | SALL4       |
| FA complementation group A                                                                | FANCA       |
| PSMC3 interacting protein                                                                 | PSMC3IP     |
| notch receptor 2                                                                          | NOTCH2      |
| paired like homeodomain 2                                                                 | PITX2       |
| alanyl-tRNA synthetase 2, mitochondrial                                                   | AARS2       |
| nuclear receptor interacting protein 1                                                    | NRIP1       |
| phosphomannomutase 2                                                                      | PMM2        |
| hydroxysteroid 17-beta dehydrogenase 4                                                    | HSD17B4     |
| ADAM metalloproteinase with thrombospondin type 1 motif 4                                 | ADAMTS4     |
| DNA meiotic recombinase 1                                                                 | DMC1        |
| Leptin                                                                                    | LEPQTL1     |
| leucyl-tRNA synthetase 2, mitochondrial                                                   | LARS2       |
| mitochondrially encoded cytochrome c oxidase I                                            | MT-CO1      |
| propionyl-CoA carboxylase subunit alpha                                                   | PCCA        |
| microtubule actin crosslinking factor 1                                                   | MACF1       |
| propionyl-CoA carboxylase subunit beta                                                    | PCCB        |
| WD repeat domain 62                                                                       | WDR62       |
| cytoplasmic polyadenylation element binding protein 1                                     | CPEB1       |
| FKBP prolyl isomerase 14                                                                  | FKBP14      |
| HLA complex P5                                                                            | HCPS5       |
| tousled like kinase 1                                                                     | TLK1        |
| abraxas 1, BRCA1 A complex subunit                                                        | ABRAXAS1    |
| nanos C2HC-type zinc finger 3                                                             | NANOS3      |
| microRNA 449b                                                                             | MIR449B     |
| microRNA 379                                                                              | MIR379      |
| transmembrane protein 150B                                                                | TMEM150B    |
