# Supplementary material for: Network Pharmacology Approach for Predicting Targets of Zishen Yutai Pills on Premature Ovarian Insufficiency
Source: Hindawi journal article supplement (doi:10.1155/2021/8215454), 2021-08-04
Supplement: f1 [file 8215454.f1.zip]

Marín V, Díaz K. The effects of oral agonists on its metabolic profile in *Spodoptera frugiperda* (L.). *Bull Entomol Res*. 2010; 102(2):133-144.

MarquesNaYc, SzeNhuu and Hottelien application requires insulin resistance through dopaminergic information in obese women with the metabolic syndrome: A randomized controlled trial (J). *Diabetologia*. 2013; 56(5): 985-994.

Kim T, Yu S, Sugawara T. Regulation of skeletal muscle protein degradation and synthesis by oral administration of lysine in rats (J). *J Nutr Sci Res Vitaminol* (Tokyo). 2013; 59(5): 412-419.

Makarewicz A V. Reasons for individuality of responses in humans and other mammals in comparative aspect (J). *Biochemistry*. 2007; 52(9): 105-109.

BATMAN-PTM

Wang Y, Xu C, Wang P, Sun S, Chen J, Li J, Chen T, and Wang J. 2011. Analysis and identification of different animal hosts by a three-stage infrared spectroscopy. *Spectrochimica Acta Part A: Molecular and Biomolecular Spectroscopy*, 63(1), pp.365-378.

Cao Q, Xu C, Yu Y, and Sadler P. 2011. *Chemical in biology and medicine*. RSC Advances, 1(4), pp.1019-1051.

BATMAN-PTM
