# Supplementary material for: Network Pharmacology Approach for Predicting Targets of Zishen Yutai Pills on Premature Ovarian Insufficiency
Source: Evid Based Complement Alternat Med. 2021 Aug 4;2021:8215454. doi: 10.1155/2021/8215454 (PMC8357500; doi:10.1155/2021/8215454)
Supplement: Supplementary Materials — Supplementary Table 1: active compounds of each herb in ZSYTP. Supplementary Table 2: corresponding targets of active compounds: (A) two target genes of SDH; (B) 138 target genes of GQZ; (C) 202 target genes of TSZ; (D) 25 target genes of BJT; (E) 121 target genes of DS; (F) 11 target genes of BZ; (G) 283 target genes of DZ; (H) 13 target genes of SR; (J) 112 target genes of RS; (K) 76 target genes of SJS; (L) 115 target genes of AY; (M) 149 target genes of HSW; (N) 68 target genes of EJ; (P) 46 target genes of LJJ. Supplementary Table 3: POI targets. Supplementary Table 4: compounds and targets attributes of C-T network. Supplementary Table 5: data of compound-target network. Supplementary Table 6: analysed C-T network: (A) active compounds of C-T network and corresponding degrees; (B) targets of C-T network and corresponding degrees. Supplementary Table 7: ZSYTP core PPI network. Supplementary Table 8: gene ontology and KEGG analysis: (A) GO-BP analysis; (B) GO-MF analysis; (C) GO-CC analysis; (D) KEGG pathway enrichment analysis. [file 8215454.f1.zip]

Archive with 25 entries (25 files):
- 8215454.f1/ST1 Active compounds of each herb in ZSYT.pdf
- 8215454.f1/ST2A SDH Herb Targets.pdf
- 8215454.f1/ST2B GQZ Herb Targets.pdf
- 8215454.f1/ST2C TSZ Herb Targets.pdf
- 8215454.f1/ST2D BJT Herb Targets.pdf
- 8215454.f1/ST2E DS Herb Targets.pdf
- 8215454.f1/ST2F BZ Herb Targets.pdf
- 8215454.f1/ST2G DZ Herb Targets.pdf
- 8215454.f1/ST2H SR Herb Targets.pdf
- 8215454.f1/ST2J RS Herb Targets.pdf
- 8215454.f1/ST2K SJS Herb Targets.pdf
- 8215454.f1/ST2L AY Herb Targets.pdf
- 8215454.f1/ST2M HSW Herb Targets.pdf
- 8215454.f1/ST2N EJ Herb Targets.pdf
- 8215454.f1/ST2P LJJ Herb Targets.pdf
- 8215454.f1/ST3 POI Targets.pdf
- 8215454.f1/ST4 Compounds and Targets Attributes of C-T network.pdf
- 8215454.f1/ST5 Data of Compound-Target Network.pdf
- 8215454.f1/ST6A Analysed C-T Network active compounds.pdf
- 8215454.f1/ST6B Analysed C-T Network Potential Targets.pdf
- 8215454.f1/ST7 ZSYT Core PPI Network.pdf
- 8215454.f1/ST8A GO-BP.pdf
- 8215454.f1/ST8B GO-MF.pdf
- 8215454.f1/ST8C GO-CC.pdf
- 8215454.f1/ST8D KEGG.pdf
