# Supplementary material for: Network Pharmacology Approach for Predicting Targets of Zishen Yutai Pills on Premature Ovarian Insufficiency
Source: Evid Based Complement Alternat Med. 2021 Aug 4;2021:8215454. doi: 10.1155/2021/8215454 (PMC8357500; doi:10.1155/2021/8215454)
Supplement: Supplementary Materials — Supplementary Table 1: active compounds of each herb in ZSYTP. Supplementary Table 2: corresponding targets of active compounds: (A) two target genes of SDH; (B) 138 target genes of GQZ; (C) 202 target genes of TSZ; (D) 25 target genes of BJT; (E) 121 target genes of DS; (F) 11 target genes of BZ; (G) 283 target genes of DZ; (H) 13 target genes of SR; (J) 112 target genes of RS; (K) 76 target genes of SJS; (L) 115 target genes of AY; (M) 149 target genes of HSW; (N) 68 target genes of EJ; (P) 46 target genes of LJJ. Supplementary Table 3: POI targets. Supplementary Table 4: compounds and targets attributes of C-T network. Supplementary Table 5: data of compound-target network. Supplementary Table 6: analysed C-T network: (A) active compounds of C-T network and corresponding degrees; (B) targets of C-T network and corresponding degrees. Supplementary Table 7: ZSYTP core PPI network. Supplementary Table 8: gene ontology and KEGG analysis: (A) GO-BP analysis; (B) GO-MF analysis; (C) GO-CC analysis; (D) KEGG pathway enrichment analysis. [file 8215454.f1.zip › 8215454.f1/ST8C GO-CC.pdf]

| Table 3B. Gene locations along a single chromosome |                |             | Accumulated Gene Weight |                         |
|----------------------------------------------------|----------------|-------------|-------------------------|-------------------------|
| Gene ID                                            | Gene Name      | Gene Weight | Accumulated Gene Weight | Accumulated Gene Weight |
| 00000001                                           | chromosome 1   | 1.00E+00    | 1.00E+00                | 1.00E+00                |
| 00000002                                           | chromosome 2   | 1.00E+00    | 2.00E+00                | 2.00E+00                |
| 00000003                                           | chromosome 3   | 1.00E+00    | 3.00E+00                | 3.00E+00                |
| 00000004                                           | chromosome 4   | 1.00E+00    | 4.00E+00                | 4.00E+00                |
| 00000005                                           | chromosome 5   | 1.00E+00    | 5.00E+00                | 5.00E+00                |
| 00000006                                           | chromosome 6   | 1.00E+00    | 6.00E+00                | 6.00E+00                |
| 00000007                                           | chromosome 7   | 1.00E+00    | 7.00E+00                | 7.00E+00                |
| 00000008                                           | chromosome 8   | 1.00E+00    | 8.00E+00                | 8.00E+00                |
| 00000009                                           | chromosome 9   | 1.00E+00    | 9.00E+00                | 9.00E+00                |
| 00000010                                           | chromosome 10  | 1.00E+00    | 1.00E+01                | 1.00E+01                |
| 00000011                                           | chromosome 11  | 1.00E+00    | 1.10E+01                | 1.10E+01                |
| 00000012                                           | chromosome 12  | 1.00E+00    | 1.20E+01                | 1.20E+01                |
| 00000013                                           | chromosome 13  | 1.00E+00    | 1.30E+01                | 1.30E+01                |
| 00000014                                           | chromosome 14  | 1.00E+00    | 1.40E+01                | 1.40E+01                |
| 00000015                                           | chromosome 15  | 1.00E+00    | 1.50E+01                | 1.50E+01                |
| 00000016                                           | chromosome 16  | 1.00E+00    | 1.60E+01                | 1.60E+01                |
| 00000017                                           | chromosome 17  | 1.00E+00    | 1.70E+01                | 1.70E+01                |
| 00000018                                           | chromosome 18  | 1.00E+00    | 1.80E+01                | 1.80E+01                |
| 00000019                                           | chromosome 19  | 1.00E+00    | 1.90E+01                | 1.90E+01                |
| 00000020                                           | chromosome 20  | 1.00E+00    | 2.00E+01                | 2.00E+01                |
| 00000021                                           | chromosome 21  | 1.00E+00    | 2.10E+01                | 2.10E+01                |
| 00000022                                           | chromosome 22  | 1.00E+00    | 2.20E+01                | 2.20E+01                |
| 00000023                                           | chromosome 23  | 1.00E+00    | 2.30E+01                | 2.30E+01                |
| 00000024                                           | chromosome 24  | 1.00E+00    | 2.40E+01                | 2.40E+01                |
| 00000025                                           | chromosome 25  | 1.00E+00    | 2.50E+01                | 2.50E+01                |
| 00000026                                           | chromosome 26  | 1.00E+00    | 2.60E+01                | 2.60E+01                |
| 00000027                                           | chromosome 27  | 1.00E+00    | 2.70E+01                | 2.70E+01                |
| 00000028                                           | chromosome 28  | 1.00E+00    | 2.80E+01                | 2.80E+01                |
| 00000029                                           | chromosome 29  | 1.00E+00    | 2.90E+01                | 2.90E+01                |
| 00000030                                           | chromosome 30  | 1.00E+00    | 3.00E+01                | 3.00E+01                |
| 00000031                                           | chromosome 31  | 1.00E+00    | 3.10E+01                | 3.10E+01                |
| 00000032                                           | chromosome 32  | 1.00E+00    | 3.20E+01                | 3.20E+01                |
| 00000033                                           | chromosome 33  | 1.00E+00    | 3.30E+01                | 3.30E+01                |
| 00000034                                           | chromosome 34  | 1.00E+00    | 3.40E+01                | 3.40E+01                |
| 00000035                                           | chromosome 35  | 1.00E+00    | 3.50E+01                | 3.50E+01                |
| 00000036                                           | chromosome 36  | 1.00E+00    | 3.60E+01                | 3.60E+01                |
| 00000037                                           | chromosome 37  | 1.00E+00    | 3.70E+01                | 3.70E+01                |
| 00000038                                           | chromosome 38  | 1.00E+00    | 3.80E+01                | 3.80E+01                |
| 00000039                                           | chromosome 39  | 1.00E+00    | 3.90E+01                | 3.90E+01                |
| 00000040                                           | chromosome 40  | 1.00E+00    | 4.00E+01                | 4.00E+01                |
| 00000041                                           | chromosome 41  | 1.00E+00    | 4.10E+01                | 4.10E+01                |
| 00000042                                           | chromosome 42  | 1.00E+00    | 4.20E+01                | 4.20E+01                |
| 00000043                                           | chromosome 43  | 1.00E+00    | 4.30E+01                | 4.30E+01                |
| 00000044                                           | chromosome 44  | 1.00E+00    | 4.40E+01                | 4.40E+01                |
| 00000045                                           | chromosome 45  | 1.00E+00    | 4.50E+01                | 4.50E+01                |
| 00000046                                           | chromosome 46  | 1.00E+00    | 4.60E+01                | 4.60E+01                |
| 00000047                                           | chromosome 47  | 1.00E+00    | 4.70E+01                | 4.70E+01                |
| 00000048                                           | chromosome 48  | 1.00E+00    | 4.80E+01                | 4.80E+01                |
| 00000049                                           | chromosome 49  | 1.00E+00    | 4.90E+01                | 4.90E+01                |
| 00000050                                           | chromosome 50  | 1.00E+00    | 5.00E+01                | 5.00E+01                |
| 00000051                                           | chromosome 51  | 1.00E+00    | 5.10E+01                | 5.10E+01                |
| 00000052                                           | chromosome 52  | 1.00E+00    | 5.20E+01                | 5.20E+01                |
| 00000053                                           | chromosome 53  | 1.00E+00    | 5.30E+01                | 5.30E+01                |
| 00000054                                           | chromosome 54  | 1.00E+00    | 5.40E+01                | 5.40E+01                |
| 00000055                                           | chromosome 55  | 1.00E+00    | 5.50E+01                | 5.50E+01                |
| 00000056                                           | chromosome 56  | 1.00E+00    | 5.60E+01                | 5.60E+01                |
| 00000057                                           | chromosome 57  | 1.00E+00    | 5.70E+01                | 5.70E+01                |
| 00000058                                           | chromosome 58  | 1.00E+00    | 5.80E+01                | 5.80E+01                |
| 00000059                                           | chromosome 59  | 1.00E+00    | 5.90E+01                | 5.90E+01                |
| 00000060                                           | chromosome 60  | 1.00E+00    | 6.00E+01                | 6.00E+01                |
| 00000061                                           | chromosome 61  | 1.00E+00    | 6.10E+01                | 6.10E+01                |
| 00000062                                           | chromosome 62  | 1.00E+00    | 6.20E+01                | 6.20E+01                |
| 00000063                                           | chromosome 63  | 1.00E+00    | 6.30E+01                | 6.30E+01                |
| 00000064                                           | chromosome 64  | 1.00E+00    | 6.40E+01                | 6.40E+01                |
| 00000065                                           | chromosome 65  | 1.00E+00    | 6.50E+01                | 6.50E+01                |
| 00000066                                           | chromosome 66  | 1.00E+00    | 6.60E+01                | 6.60E+01                |
| 00000067                                           | chromosome 67  | 1.00E+00    | 6.70E+01                | 6.70E+01                |
| 00000068                                           | chromosome 68  | 1.00E+00    | 6.80E+01                | 6.80E+01                |
| 00000069                                           | chromosome 69  | 1.00E+00    | 6.90E+01                | 6.90E+01                |
| 00000070                                           | chromosome 70  | 1.00E+00    | 7.00E+01                | 7.00E+01                |
| 00000071                                           | chromosome 71  | 1.00E+00    | 7.10E+01                | 7.10E+01                |
| 00000072                                           | chromosome 72  | 1.00E+00    | 7.20E+01                | 7.20E+01                |
| 00000073                                           | chromosome 73  | 1.00E+00    | 7.30E+01                | 7.30E+01                |
| 00000074                                           | chromosome 74  | 1.00E+00    | 7.40E+01                | 7.40E+01                |
| 00000075                                           | chromosome 75  | 1.00E+00    | 7.50E+01                | 7.50E+01                |
| 00000076                                           | chromosome 76  | 1.00E+00    | 7.60E+01                | 7.60E+01                |
| 00000077                                           | chromosome 77  | 1.00E+00    | 7.70E+01                | 7.70E+01                |
| 00000078                                           | chromosome 78  | 1.00E+00    | 7.80E+01                | 7.80E+01                |
| 00000079                                           | chromosome 79  | 1.00E+00    | 7.90E+01                | 7.90E+01                |
| 00000080                                           | chromosome 80  | 1.00E+00    | 8.00E+01                | 8.00E+01                |
| 00000081                                           | chromosome 81  | 1.00E+00    | 8.10E+01                | 8.10E+01                |
| 00000082                                           | chromosome 82  | 1.00E+00    | 8.20E+01                | 8.20E+01                |
| 00000083                                           | chromosome 83  | 1.00E+00    | 8.30E+01                | 8.30E+01                |
| 00000084                                           | chromosome 84  | 1.00E+00    | 8.40E+01                | 8.40E+01                |
| 00000085                                           | chromosome 85  | 1.00E+00    | 8.50E+01                | 8.50E+01                |
| 00000086                                           | chromosome 86  | 1.00E+00    | 8.60E+01                | 8.60E+01                |
| 00000087                                           | chromosome 87  | 1.00E+00    | 8.70E+01                | 8.70E+01                |
| 00000088                                           | chromosome 88  | 1.00E+00    | 8.80E+01                | 8.80E+01                |
| 00000089                                           | chromosome 89  | 1.00E+00    | 8.90E+01                | 8.90E+01                |
| 00000090                                           | chromosome 90  | 1.00E+00    | 9.00E+01                | 9.00E+01                |
| 00000091                                           | chromosome 91  | 1.00E+00    | 9.10E+01                | 9.10E+01                |
| 00000092                                           | chromosome 92  | 1.00E+00    | 9.20E+01                | 9.20E+01                |
| 00000093                                           | chromosome 93  | 1.00E+00    | 9.30E+01                | 9.30E+01                |
| 00000094                                           | chromosome 94  | 1.00E+00    | 9.40E+01                | 9.40E+01                |
| 00000095                                           | chromosome 95  | 1.00E+00    | 9.50E+01                | 9.50E+01                |
| 00000096                                           | chromosome 96  | 1.00E+00    | 9.60E+01                | 9.60E+01                |
| 00000097                                           | chromosome 97  | 1.00E+00    | 9.70E+01                | 9.70E+01                |
| 00000098                                           | chromosome 98  | 1.00E+00    | 9.80E+01                | 9.80E+01                |
| 00000099                                           | chromosome 99  | 1.00E+00    | 9.90E+01                | 9.90E+01                |
| 00000100                                           | chromosome 100 | 1.00E+00    | 1.00E+02                | 1.00E+02                |
